# Supplementary material for: Incidence of clinical malaria, acute respiratory illness, and diarrhoea in children in southern Malawi: a prospective cohort study
Source: Malar J. 2021 Dec 20;20:473. doi: 10.1186/s12936-021-04013-5 (PMC8685799; doi:10.1186/s12936-021-04013-5)
Supplement: Supplementary file 4 — Additional file 4. Appendix 4: Acute respiratory infections (ARIs) events. [file 12936_2021_4013_MOESM4_ESM.csv]

	openhdsindividualId	visit_date	Age_days	visit	follow_upcinical_event_count	numofcough	cough_event_count	event_date1	other_dx_specify1	cough_date1	diagnoses_code_cough1	event_date2	other_dx_specify2	cough_date2	diagnoses_code_cough2	event_date3	other_dx_specify3	cough_date3	diagnoses_code_cough3	event_month	event_year	event_month2	event_year2	event_month3	event_year3	event_month4	event_year4	event_month5	event_year5	event_month6	event_year6
1218	ALI000010004	2018-09-27	1320	12	NA	1	1	NA		2018-07-07	c2	NA		NA		NA		NA		7	2018	NA	NA	NA	NA	NA	NA	NA	NA	NA	NA
21	BWA000092006	2018-02-19	353	4	2	NA	NA	2018-01-12	COUGH	NA		2017-12-04		NA		NA		NA		NA	NA	NA	NA	NA	NA	1	2018	12	2017	NA	NA
482	BWA000117005	2018-10-09	873	12	1	1	1	NA		2018-10-01	c2	NA		NA		NA		NA		10	2018	NA	NA	NA	NA	NA	NA	NA	NA	NA	NA
420	BWA000126006	2018-10-09	1214	8	1	1	1	NA		2018-09-26	c2	NA		NA		NA		NA		9	2018	NA	NA	NA	NA	NA	NA	NA	NA	NA	NA
284	C2H000009006	2018-05-08	459	4	NA	1	1	NA		2018-04-14	c2	NA		NA		NA		NA		4	2018	NA	NA	NA	NA	NA	NA	NA	NA	NA	NA
66	C2H000067003	2019-03-27	1031	6	2	1	1	NA		2019-03-05	c2	NA		NA		NA		NA		3	2019	NA	NA	NA	NA	NA	NA	NA	NA	NA	NA
1144	C3H000113004	2018-07-25	549	2	1	1	1	NA		2018-06-01	c2	NA		NA		NA		NA		6	2018	NA	NA	NA	NA	NA	NA	NA	NA	NA	NA
586	C3H000113004	2018-10-03	619	4	1	1	1	NA		2018-10-03	c2	NA		NA		NA		NA		10	2018	NA	NA	NA	NA	NA	NA	NA	NA	NA	NA
256	C3H000137007	2018-04-25	1111	2	1	1	1	NA		2018-04-06	c2	NA		NA		NA		NA		4	2018	NA	NA	NA	NA	NA	NA	NA	NA	NA	NA
588	C3I000001004	2018-05-17	746	8	1	1	1	NA		2018-04-17	c2	NA		2018-04-17	c2	NA		2018-04-17	c2	4	2018	4	2018	4	2018	NA	NA	NA	NA	NA	NA
487	C4H000077005	2018-04-19	1463	2	4	1	1	NA		2018-04-09	c2	NA		NA		NA		NA		4	2018	NA	NA	NA	NA	NA	NA	NA	NA	NA	NA
943	C4H000181004	2018-04-19	1198	2	1	1	1	NA		2018-03-15	c2	NA		NA		NA		NA		3	2018	NA	NA	NA	NA	NA	NA	NA	NA	NA	NA
442	C4H000181004	2018-06-12	1245	4	1	1	1	NA		2018-05-18	c2	NA		NA		NA		NA		5	2018	NA	NA	NA	NA	NA	NA	NA	NA	NA	NA
716	C4H000187005	2018-09-26	1021	10	1	1	1	NA		2018-06-11	c2	NA		NA		NA		NA		6	2018	NA	NA	NA	NA	NA	NA	NA	NA	NA	NA
583	C5H000008007	2018-10-04	1290	12	NA	1	1	NA		2018-08-08	c2	NA		NA		NA		NA		8	2018	NA	NA	NA	NA	NA	NA	NA	NA	NA	NA
1273	C5H000043005	2018-04-26	949	2	1	1	1	NA		2018-04-12	c2	NA		NA		NA		NA		4	2018	NA	NA	NA	NA	NA	NA	NA	NA	NA	NA
155	C5H000052008	2018-07-11	1714	10	NA	1	1	NA		2018-06-04	c1	NA		NA		NA		NA		6	2018	NA	NA	NA	NA	NA	NA	NA	NA	NA	NA
399	C5H000052008	2018-07-11	1720	10	1	1	1	NA		2018-04-04	c2	NA		NA		NA		NA		4	2018	NA	NA	NA	NA	NA	NA	NA	NA	NA	NA
267	CH6000011005	2018-07-10	740	8	NA	1	1	NA		2018-06-05	c2	NA		NA		NA		NA		6	2018	NA	NA	NA	NA	NA	NA	NA	NA	NA	NA
636	CH6000089005	2018-11-08	1381	6	NA	1	1	NA		2018-11-08	c2	NA		NA		NA		NA		11	2018	NA	NA	NA	NA	NA	NA	NA	NA	NA	NA
850	CHM000143006	2018-10-08	427	6	1	1	1	NA		2018-08-10	c2	NA		NA		NA		NA		8	2018	NA	NA	NA	NA	NA	NA	NA	NA	NA	NA
1049	FEL000023009	2018-06-27	480	8	2	1	1	NA		2018-06-16	c2	NA		NA		NA		NA		6	2018	NA	NA	NA	NA	NA	NA	NA	NA	NA	NA
905	FEL000023009	2018-09-27	572	12	NA	2	2	NA		2018-09-19	c2	NA		2018-09-05	c2	NA		NA		9	2018	9	2018	NA	NA	NA	NA	NA	NA	NA	NA
1279	GAL000023007	2018-05-16	444	8	2	1	1	NA		2018-05-03	c6	NA		NA		NA		NA		5	2018	NA	NA	NA	NA	NA	NA	NA	NA	NA	NA
159	GAL000023007	2018-07-06	495	10	1	1	1	NA		2018-06-03	c6	NA		NA		NA		NA		6	2018	NA	NA	NA	NA	NA	NA	NA	NA	NA	NA
975	GAL000023007	2018-09-20	571	12	1	1	1	NA		2018-08-03	c2	NA		NA		NA		NA		8	2018	NA	NA	NA	NA	NA	NA	NA	NA	NA	NA
550	GAW000009004	2018-07-17	446	8	3	3	3	NA		2018-05-23	c1	NA		2018-05-06	c1	NA		2018-07-13	c1	5	2018	5	2018	7	2018	NA	NA	NA	NA	NA	NA
869	GAW000009004	2018-10-03	524	10	1	1	1	NA		2018-09-23	c1	NA		NA		NA		NA		9	2018	NA	NA	NA	NA	NA	NA	NA	NA	NA	NA
887	GAW000035005	2018-05-03	1426	8	2	2	2	NA		2018-03-26	c1	NA		2018-04-19	c1	NA		NA		3	2018	4	2018	NA	NA	NA	NA	NA	NA	NA	NA
342	GAW000035006	2018-07-18	558	8	1	1	1	NA		2018-06-24	c1	NA		NA		NA		NA		6	2018	NA	NA	NA	NA	NA	NA	NA	NA	NA	NA
92	GAW000035006	2018-08-15	586	10	1	1	1	NA		2018-06-25	c1	NA		NA		NA		NA		6	2018	NA	NA	NA	NA	NA	NA	NA	NA	NA	NA
771	GOL000029009	2018-05-16	586	6	3	3	3	NA		2018-03-16	c1	NA		2018-04-09	c1	NA		2018-04-14	c1	3	2018	4	2018	4	2018	NA	NA	NA	NA	NA	NA
872	GOL000029009	2018-07-22	653	8	1	1	1	NA		2018-07-10	c1	NA		NA		NA		NA		7	2018	NA	NA	NA	NA	NA	NA	NA	NA	NA	NA
183	HAR000047006	2018-09-27	946	12	NA	1	1	NA		2018-09-21	c2	NA		NA		NA		NA		9	2018	NA	NA	NA	NA	NA	NA	NA	NA	NA	NA
673	JAN000025007	2018-07-17	606	2	1	1	1	NA		2018-05-22	c2	NA		NA		NA		NA		5	2018	NA	NA	NA	NA	NA	NA	NA	NA	NA	NA
525	K1A000004007	2018-03-12	1035	4	2	NA	NA	2018-02-27	Sepsis	NA		2018-01-10	TONSILITIS	NA		NA		NA		NA	NA	NA	NA	NA	NA	2	2018	1	2018	NA	NA
803	K1A000005008	2018-07-04	339	4	3	3	3	NA		2018-04-24	c1	NA		2018-04-09	c1	NA		2018-06-06	c1	4	2018	4	2018	6	2018	NA	NA	NA	NA	NA	NA
98	K1A000005008	2018-10-24	451	6	4	1	1	NA		2018-09-20	c1	NA		NA		NA		NA		9	2018	NA	NA	NA	NA	NA	NA	NA	NA	NA	NA
1032	K1A000010003	2018-07-04	1184	8	3	1	1	NA		2018-04-22	c1	NA		NA		NA		NA		4	2018	NA	NA	NA	NA	NA	NA	NA	NA	NA	NA
635	K1A000016005	2018-07-04	392	4	3	2	2	NA		2018-05-30	c1	NA		2018-04-04	c1	NA		NA		5	2018	4	2018	NA	NA	NA	NA	NA	NA	NA	NA
1060	K1A000030009	2018-07-04	668	4	1	1	1	NA		2018-03-21	c1	NA		NA		NA		NA		3	2018	NA	NA	NA	NA	NA	NA	NA	NA	NA	NA
1243	K1A000030010	2018-07-04	668	4	1	1	1	NA		2018-04-21	c2	NA		NA		NA		NA		4	2018	NA	NA	NA	NA	NA	NA	NA	NA	NA	NA
996	K1A000032003	2018-05-09	1220	8	2	2	2	NA		2018-05-07	c1	NA		2018-05-07	c1	NA		NA		5	2018	5	2018	NA	NA	NA	NA	NA	NA	NA	NA
1029	K3A000018004	2018-04-25	559	2	1	1	1	NA		2018-04-09	c2	NA		NA		NA		NA		4	2018	NA	NA	NA	NA	NA	NA	NA	NA	NA	NA
295	K3A000018004	2018-09-26	713	8	1	1	1	NA		2018-09-07	c2	NA		NA		NA		NA		9	2018	NA	NA	NA	NA	NA	NA	NA	NA	NA	NA
219	K4I000029004	2018-05-03	588	8	1	1	1	NA		2018-03-19	c2	NA		NA		NA		NA		3	2018	NA	NA	NA	NA	NA	NA	NA	NA	NA	NA
376	K4I000032006	2018-07-12	367	4	1	1	1	NA		2018-04-19	c2	NA		NA		NA		NA		4	2018	NA	NA	NA	NA	NA	NA	NA	NA	NA	NA
1154	K4I000050005	2018-07-11	364	4	2	2	2	NA		2018-05-04	c2	NA		2018-05-28	c2	NA		NA		5	2018	5	2018	NA	NA	NA	NA	NA	NA	NA	NA
203	KA3000011003	2018-05-31	751	8	2	1	1	NA		2018-03-14	c1	NA		NA		NA		NA		3	2018	NA	NA	NA	NA	NA	NA	NA	NA	NA	NA
999	KA3000012005	2018-02-14	446	4	2	NA	NA	2018-01-29	URTI	NA		2018-01-11	OTITIS MEDIA	NA		NA		NA		NA	NA	NA	NA	NA	NA	1	2018	1	2018	NA	NA
566	KA3000012005	2018-05-31	552	8	1	1	1	NA		2018-04-05	c1	NA		NA		NA		NA		4	2018	NA	NA	NA	NA	NA	NA	NA	NA	NA	NA
524	KA3000014004	2018-05-31	1244	8	1	1	1	NA		2018-05-28	c1	NA		NA		NA		NA		5	2018	NA	NA	NA	NA	NA	NA	NA	NA	NA	NA
706	KA3000014004	2018-08-30	1335	10	2	1	1	NA		2018-08-06	c1	NA		NA		NA		NA		8	2018	NA	NA	NA	NA	NA	NA	NA	NA	NA	NA
113	KAI000166005	2018-04-24	999	2	2	2	2	NA		2018-02-18	c2	NA		2018-03-14	c2	NA		NA		2	2018	3	2018	NA	NA	NA	NA	NA	NA	NA	NA
615	KAL000012007	2018-08-23	477	6	1	2	2	NA		2018-07-10	c2	NA		2018-06-16	c2	NA		NA		7	2018	6	2018	NA	NA	NA	NA	NA	NA	NA	NA
530	KAN000093006	2018-05-09	991	4	2	1	1	NA		2018-04-12	c2	NA		NA		NA		NA		4	2018	NA	NA	NA	NA	NA	NA	NA	NA	NA	NA
471	KAU000025004	2018-05-02	719	8	1	1	1	NA		2018-03-27	c2	NA		NA		NA		NA		3	2018	NA	NA	NA	NA	NA	NA	NA	NA	NA	NA
285	KAU000043005	2018-05-16	766	4	3	1	1	NA		2018-03-26	c1	NA		NA		NA		NA		3	2018	NA	NA	NA	NA	NA	NA	NA	NA	NA	NA
429	LIW000141009	2018-05-17	883	8	2	1	1	NA		2018-04-09	c2	NA		NA		NA		NA		4	2018	NA	NA	NA	NA	NA	NA	NA	NA	NA	NA
548	M2I000013007	2018-09-25	1352	12	NA	1	1	NA		2018-09-22	c2	NA		NA		NA		NA		9	2018	NA	NA	NA	NA	NA	NA	NA	NA	NA	NA
254	MA2000065011	2018-07-17	313	4	1	1	1	NA		2018-05-04	c1	NA		NA		NA		NA		5	2018	NA	NA	NA	NA	NA	NA	NA	NA	NA	NA
732	MAI000123003	2018-08-15	759	4	1	1	1	NA		2018-06-21	c2	NA		NA		NA		NA		6	2018	NA	NA	NA	NA	NA	NA	NA	NA	NA	NA
674	MBI000083006	2018-03-13	538	4	1	NA	NA	2018-03-06	ARI	NA		NA		NA		NA		NA		NA	NA	NA	NA	NA	NA	3	2018	NA	NA	NA	NA
974	MBI000083006	2018-05-09	595	6	1	1	1	NA		2018-03-06	c1	NA		NA		NA		NA		3	2018	NA	NA	NA	NA	NA	NA	NA	NA	NA	NA
1264	MKA000014007	2018-10-01	1506	8	1	1	1	NA		2018-07-31	c2	NA		NA		NA		NA		7	2018	NA	NA	NA	NA	NA	NA	NA	NA	NA	NA
272	MKA000036005	2017-11-09	581	2	3	NA	NA	2017-10-19	CONJUNCTIVITIS	NA		2017-09-28	RTI	NA		2017-11-03	DIARRHOEA	NA		NA	NA	NA	NA	NA	NA	10	2017	9	2017	11	2017
1083	MKA000036005	2018-07-06	820	10	NA	1	1	NA		2018-07-04	c1	NA		NA		NA		NA		7	2018	NA	NA	NA	NA	NA	NA	NA	NA	NA	NA
979	MKA000061005	2018-11-20	293	2	1	1	1	NA		2018-10-10	c2	NA		NA		NA		NA		10	2018	NA	NA	NA	NA	NA	NA	NA	NA	NA	NA
728	MKI000020005	2018-11-02	1335	12	1	1	1	NA		2018-09-03	c2	NA		NA		NA		NA		9	2018	NA	NA	NA	NA	NA	NA	NA	NA	NA	NA
283	MKI000073007	2019-01-10	572	2	2	1	1	NA		2018-11-22	c2	NA		NA		NA		NA		11	2018	NA	NA	NA	NA	NA	NA	NA	NA	NA	NA
1208	MKI000073007	2019-03-27	648	6	1	1	1	NA		2019-01-28	c2	NA		NA		NA		NA		1	2019	NA	NA	NA	NA	NA	NA	NA	NA	NA	NA
838	MKW000068005	2018-05-10	460	8	1	1	1	NA		2018-04-16	c1	NA		NA		NA		NA		4	2018	NA	NA	NA	NA	NA	NA	NA	NA	NA	NA
917	MKW000076004	2018-04-25	730	4	1	1	1	NA		2018-03-23	c1	NA		NA		NA		NA		3	2018	NA	NA	NA	NA	NA	NA	NA	NA	NA	NA
85	MKW000076005	2018-04-25	730	4	1	1	1	NA		2018-03-23	c1	NA		NA		NA		NA		3	2018	NA	NA	NA	NA	NA	NA	NA	NA	NA	NA
244	MKW000080006	2018-08-21	1084	4	1	1	1	NA		2018-08-15	c1	NA		NA		NA		NA		8	2018	NA	NA	NA	NA	NA	NA	NA	NA	NA	NA
1217	MP2000007003	2018-07-22	1399	8	1	1	1	NA		2018-05-11	c1	NA		NA		NA		NA		5	2018	NA	NA	NA	NA	NA	NA	NA	NA	NA	NA
260	MP2000008005	2018-03-14	870	6	1	NA	NA	2018-03-14	URTI	NA		NA		NA		NA		NA		NA	NA	NA	NA	NA	NA	3	2018	NA	NA	NA	NA
1075	MTE000048006	2018-05-16	546	6	1	1	1	NA		2018-05-04	c1	NA		NA		NA		NA		5	2018	NA	NA	NA	NA	NA	NA	NA	NA	NA	NA
592	MTE000048006	2018-11-13	727	12	1	1	1	NA		2018-10-18	c1	NA		NA		NA		NA		10	2018	NA	NA	NA	NA	NA	NA	NA	NA	NA	NA
235	MTE000050005	2018-05-03	989	6	1	1	1	NA		2018-04-24	c1	NA		NA		NA		NA		4	2018	NA	NA	NA	NA	NA	NA	NA	NA	NA	NA
216	MTE000051005	2018-05-16	350	2	2	1	1	NA		2018-03-19	c1	NA		NA		NA		NA		3	2018	NA	NA	NA	NA	NA	NA	NA	NA	NA	NA
853	MTE000052008	2018-05-31	633	8	1	1	1	NA		2018-04-24	c1	NA		NA		NA		NA		4	2018	NA	NA	NA	NA	NA	NA	NA	NA	NA	NA
313	MTE000058009	2018-05-31	871	4	1	1	1	NA		2018-05-03	c1	NA		NA		NA		NA		5	2018	NA	NA	NA	NA	NA	NA	NA	NA	NA	NA
202	MU2000035003	2018-11-08	1503	6	1	1	1	NA		2018-10-08	c2	NA		NA		NA		NA		10	2018	NA	NA	NA	NA	NA	NA	NA	NA	NA	NA
1252	MWA000039004	2018-04-19	360	2	3	1	1	NA		2018-03-05	c2	NA		NA		NA		NA		3	2018	NA	NA	NA	NA	NA	NA	NA	NA	NA	NA
1254	MWA000039004	2018-12-05	583	10	1	1	1	NA		2018-11-21	c2	NA		NA		NA		NA		11	2018	NA	NA	NA	NA	NA	NA	NA	NA	NA	NA
820	MWA000144006	2018-03-16	708	4	1	NA	NA	2018-02-25	Cough	NA		NA		NA		NA		NA		NA	NA	NA	NA	NA	NA	2	2018	NA	NA	NA	NA
711	NJE000070005	2018-11-21	1568	4	1	1	1	NA		2018-08-27	c2	NA		NA		NA		NA		8	2018	NA	NA	NA	NA	NA	NA	NA	NA	NA	NA
571	NJE000302007	2018-04-19	613	2	2	2	2	NA		2018-03-25		NA		2018-03-29		NA		NA		3	2018	3	2018	NA	NA	NA	NA	NA	NA	NA	NA
1026	NJE000347005	2018-04-19	1531	2	2	2	2	NA		2018-03-09		NA		2018-03-08		NA		NA		3	2018	3	2018	NA	NA	NA	NA	NA	NA	NA	NA
1070	NJE000347005	2018-06-05	1578	4	2	1	1	NA		2018-05-16	c2	NA		NA		NA		NA		5	2018	NA	NA	NA	NA	NA	NA	NA	NA	NA	NA
294	NJE000401006	2018-04-19	1504	2	1	1	1	NA		2018-04-16		NA		NA		NA		NA		4	2018	NA	NA	NA	NA	NA	NA	NA	NA	NA	NA
1185	NOV000054006	2018-02-14	399	4	1	NA	NA	2018-01-20	COUGHING	NA		NA		NA		NA		NA		NA	NA	NA	NA	NA	NA	1	2018	NA	NA	NA	NA
676	NOV000054006	2018-09-27	624	12	NA	1	1	NA		2018-09-24	c2	NA		NA		NA		NA		9	2018	NA	NA	NA	NA	NA	NA	NA	NA	NA	NA
171	SAU000010003	2018-09-04	673	4	1	1	1	NA		2018-05-20	c2	NA		NA		NA		NA		5	2018	NA	NA	NA	NA	NA	NA	NA	NA	NA	NA
143	SAU000010003	2018-11-13	743	8	1	1	1	NA		2018-10-12	c2	NA		NA		NA		NA		10	2018	NA	NA	NA	NA	NA	NA	NA	NA	NA	NA
1113	SAU000010003	2019-03-20	870	12	1	1	1	NA		2019-03-14	c1	NA		NA		NA		NA		3	2019	NA	NA	NA	NA	NA	NA	NA	NA	NA	NA
258	SAU000046008	2018-05-03	754	6	2	2	2	NA		2018-04-19	c2	NA		2018-03-03	c2	NA		NA		4	2018	3	2018	NA	NA	NA	NA	NA	NA	NA	NA
389	SAU000046008	2018-07-05	817	8	1	1	1	NA		2018-07-03	c2	NA		NA		NA		NA		7	2018	NA	NA	NA	NA	NA	NA	NA	NA	NA	NA
1121	SAU000059007	2018-03-14	800	6	2	NA	NA	2018-03-14	URTI	NA		2018-03-14	DYSENTERY	NA		NA		NA		NA	NA	NA	NA	NA	NA	3	2018	3	2018	NA	NA
1110	SAU000059007	2018-06-05	883	8	1	1	1	NA		2018-03-17	c1	NA		NA		NA		NA		3	2018	NA	NA	NA	NA	NA	NA	NA	NA	NA	NA
703	SEK000055008	2018-12-06	1047	8	1	1	1	NA		2018-11-15	c2	NA		NA		NA		NA		11	2018	NA	NA	NA	NA	NA	NA	NA	NA	NA	NA
881	SIM000016003	2018-07-10	1028	8	1	1	1	NA		2018-06-10	c1	NA		NA		NA		NA		6	2018	NA	NA	NA	NA	NA	NA	NA	NA	NA	NA
1260	SIM000042006	2018-08-16	723	4	1	1	1	NA		2018-06-07	c1	NA		NA		NA		NA		6	2018	NA	NA	NA	NA	NA	NA	NA	NA	NA	NA
269	SIM000058006	2018-05-10	1291	8	1	1	1	NA		2018-04-24	c1	NA		NA		NA		NA		4	2018	NA	NA	NA	NA	NA	NA	NA	NA	NA	NA
637	SIM000079008	2018-07-10	1137	8	1	1	1	NA		2018-06-01	c1	NA		NA		NA		NA		6	2018	NA	NA	NA	NA	NA	NA	NA	NA	NA	NA
987	TSE000004006	2018-10-11	1044	10	1	1	1	NA		2018-10-02	c1	NA		NA		NA		NA		10	2018	NA	NA	NA	NA	NA	NA	NA	NA	NA	NA
346	TSE000015006	2018-06-18	778	4	1	1	1	NA		2018-05-21	c1	NA		NA		NA		NA		5	2018	NA	NA	NA	NA	NA	NA	NA	NA	NA	NA
783	TSE000053013	2018-05-09	1326	4	2	2	2	NA		2018-05-03	c1	NA		2018-04-14	c1	NA		NA		5	2018	4	2018	NA	NA	NA	NA	NA	NA	NA	NA
516	WAI000023003	2018-05-02	1403	4	2	1	1	NA		2018-04-04	c1	NA		NA		NA		NA		4	2018	NA	NA	NA	NA	NA	NA	NA	NA	NA	NA
727	WAI000044006	2018-05-02	1628	6	1	1	1	NA		2018-04-16	c1	NA		NA		NA		NA		4	2018	NA	NA	NA	NA	NA	NA	NA	NA	NA	NA
1061	WAI000048006	2018-03-14	929	6	1	NA	NA	2018-03-14	URTI	NA		NA		NA		NA		NA		NA	NA	NA	NA	NA	NA	3	2018	NA	NA	NA	NA
574	WAI000048006	2018-05-02	978	8	1	1	1	NA		2018-04-24	c1	NA		NA		NA		NA		4	2018	NA	NA	NA	NA	NA	NA	NA	NA	NA	NA
867	WER000010004	2018-02-13	427	2	3	NA	NA	2018-01-13	SEPSIS	NA		2017-11-30		NA		2018-01-08	URTI	NA		NA	NA	NA	NA	NA	NA	1	2018	11	2017	1	2018
777	WER000010004	2018-05-09	512	6	1	1	1	NA		2018-04-01	c2	NA		NA		NA		NA		4	2018	NA	NA	NA	NA	NA	NA	NA	NA	NA	NA
104	WER000016004	2018-05-10	847	6	1	1	1	NA		2018-04-16	c1	NA		NA		NA		NA		4	2018	NA	NA	NA	NA	NA	NA	NA	NA	NA	NA
818	WER000026006	2018-05-02	798	8	1	1	1	NA		2018-03-23	c1	NA		NA		NA		NA		3	2018	NA	NA	NA	NA	NA	NA	NA	NA	NA	NA
744	ZAB000020003	2018-05-10	1374	8	2	1	1	NA		2018-04-23	c1	NA		NA		NA		NA		4	2018	NA	NA	NA	NA	NA	NA	NA	NA	NA	NA
1134	ZAB000031007	2018-03-15	1182	6	4	NA	NA	2018-03-06	URTI	NA		2018-03-04	URTI	NA		2018-02-18	GE	NA		NA	NA	NA	NA	NA	NA	3	2018	3	2018	2	2018
438	ZAB000053005	2018-07-03	1630	8	1	1	1	NA		2018-06-29	c1	NA		NA		NA		NA		6	2018	NA	NA	NA	NA	NA	NA	NA	NA	NA	NA
