# Supplementary material for: Incidence of clinical malaria, acute respiratory illness, and diarrhoea in children in southern Malawi: a prospective cohort study
Source: Malar J. 2021 Dec 20;20:473. doi: 10.1186/s12936-021-04013-5 (PMC8685799; doi:10.1186/s12936-021-04013-5)
Supplement: Supplementary file 6 — Additional file 6. Appendix 6: MMP focal area A weather data. [file 12936_2021_4013_MOESM6_ESM.csv]

Date	Time	TempC	RH	Rainmm	WaterContentmm	WindSpeedms	GustSpeedms	WindDirectionø	BattVc5
22-May-17	14:24.0	17.106	94.9	0		0	0	164.3	4.206
10-Jul-17	14:24.0	26.989	46.4	0	0.0013	0	0	223.2	4.393
19-Jun-17	14:24.0	17.296	84.6	0	0.0013	0	0	144.6	4.218
17-May-17	14:24.0	21.246	95.6	0	0.0013	0	0	150.2	4.267
29-Jun-17	14:24.0	28.667	53.1	0		0	0	64.6	4.393
21-May-17	14:24.0	19.484	76	0	0.0029	0	0	160	4.224
15-May-17	14:24.0	18.2	97.5	0		0	0	199.4	4.188
15-Jun-17	14:24.0	30.571	47.2	0		0	0	57.6	4.351
19-Jun-17	14:24.0	17.415	78.4	0	0.004	0	0	157.2	4.224
14-Jun-17	14:24.0	27.579	56.1	0	0.005	0	0	57.6	4.339
9-Jun-17	14:24.0	27.308	46.7	0		0	0	143.2	4.333
3-Jul-17	14:24.0	24.291	55.1	0	0.0056	0	0	108.1	4.333
15-Jun-17	14:24.0	28.419	54	0	0.0056	0	0	63.2	4.357
24-May-17	14:24.0	14.936	90.3	0	0.0056	0	0	158.6	4.206
15-May-17	14:24.0	18.057	97.8	0	0.0056	0	0	353.8	4.188
5-Jun-17	14:24.0	23.785	70.1	0		0	0	21.1	4.333
23-May-17	14:24.0	18.39	87.3	0		0	0	158.6	4.224
16-May-17	14:24.0	21.795	86.1	0	0.0081	0	0	155.8	4.224
4-Jul-17	14:24.0	26.818	46.7	0		0.5	3.52	209.2	4.339
5-Jun-17	14:24.0	28.32	47.1	0	0.0087	0	0	230.2	4.369
30-Jun-17	14:24.0	18.913	92.7	0	0.0087	0	0	151.6	4.188
14-Jun-17	14:24.0	29.19	51.7	0	0.0087	0	0	50.5	4.4
15-Jun-17	14:24.0	30.343	42.4	0		0	0	132	4.339
21-May-17	14:24.0	18.937	79.3	0		0	0	160	4.224
21-May-17	14:24.0	17.486	89.4	0	0.0107	0	0	155.8	4.224
16-May-17	14:24.0	21.628	87	0		0	0	154.4	4.224
8-Jun-17	14:24.0	26.989	61.5	0		0	0	248.5	4.357
19-Jun-17	14:24.0	24.653	56.1	0		0	0	147.4	4.339
21-Jun-17	14:24.0	16.773	80.6	0		0	0	151.6	4.2
15-May-17	14:24.0	18.747	96.1	0		0	0	334.1	4.194
23-Jun-17	14:24.0	27.949	38.5	0	0.0122	0	0	207.8	4.363
5-Jun-17	14:24.0	25.162	57.9	0	0.0127	0	0	110.9	4.369
20-May-17	14:24.0	20.007	80.8	0		0	0	154.4	4.237
12-May-17	14:24.0	19.08	82.6	0	0.0137	0	0	344	4.212
20-May-17	14:24.0	19.936	81.4	0	0.0137	0	0	154.4	4.224
9-Jun-17	14:24.0	26.573	52.9	0		0	0	179.7	4.375
11-May-17	14:24.0	20.293	79.7	0	0.0147	0	0	158.6	4.224
13-May-17	14:24.0	21.867	79.4	0		0	0	147.4	4.224
21-Jun-17	14:24.0	17.391	86.7	0		0	0	153	4.2
2-Jul-17	14:24.0	25.841	38.8	0		0	0	186.7	4.321
22-May-17	14:24.0	19.032	83.3	0	0.0161	0	0	158.6	4.237
23-May-17	14:24.0	17.605	95.8	0	0.0166	0	0	151.6	4.412
30-Jun-17	14:24.0	19.746	89.6	0		0	0	154.4	4.188
29-Jun-17	14:24.0	22.034	75.7	0		0	0	150.2	4.212
27-Jun-17	14:24.0	25.016	66.2	0		0	0	185.3	4.351
3-Jun-17	14:24.0	25.963	54.9	0	0.0186	0	0	139	4.381
7-Jul-17	14:24.0	25.501	57.7	0	0.019	0	0	144.6	4.339
18-Jun-17	14:24.0	26.524	57.5	0	0.019	0	0	113.7	4.339
20-Jun-17	14:24.0	24.363	48.8	0		0	0	137.6	4.351
19-May-17	14:24.0	19.032	95.3	0		0	0	150.2	4.393
20-Jun-17	14:24.0	25.331	44.2	0	0.0205	0	0	137.6	4.339
3-Jul-17	14:24.0	26.769	41.2	0	0.0214	0	0	209.2	4.339
17-May-17	14:24.0	20.15	89.7	0	0.0224	0	0	151.6	4.224
22-Jun-17	14:24.0	24.315	66.5	0		0	0	153	4.339
15-May-17	14:24.0	19.199	95.7	0	0.0261	0	0	171.3	4.194
15-Jun-17	14:24.0	29.29	52.1	0	0.0274	0	0	64.6	4.321
24-May-17	14:24.0	21.939	70.5	0	0.0274	0	0	167.1	4.249
22-May-17	14:24.0	17.272	95.4	0	0.0274	0	0	175.5	4.2
17-May-17	14:24.0	20.627	88.6	0	0.0283	0	0	148.8	4.224
20-May-17	14:24.0	17.463	85.7	0		0	0	155.8	4.224
10-Jun-17	14:24.0	26.207	50.9	0		0	0	126.4	4.333
19-Jun-17	14:24.0	25.331	48.7	0		0	0	143.2	4.339
9-Jul-17	14:24.0	27.431	43.9	0		0	0	154.4	4.375
14-May-17	14:24.0	19.841	96.9	0		0	0	153	4.321
19-May-17	14:24.0	17.629	90.5	0	0.031	0	0	158.6	4.218
17-May-17	14:24.0	21.294	89.9	0	0.0319	0	0	158.6	4.224
7-Jul-17	14:24.0	24.267	65.6	0		0	0	147.4	4.345
9-Jun-17	14:24.0	24.992	58.8	0		0	0	266.7	4.333
30-Jun-17	14:24.0	18.985	92.8	0		0	0	155.8	4.188
2-Jul-17	14:24.0	25.525	46.7	0	0.0328	0	0	157.2	4.369
13-May-17	14:24.0	19.436	86.7	0	0.0328	0	0	164.3	4.212
25-May-17	14:24.0	21.223	82.3	0	0.0328	0	0	140.4	4.393
21-May-17	14:24.0	25.963	58.6	0		0	0	150.2	4.363
16-Jun-17	14:24.0	27.136	64.8	0		0	0	158.6	4.333
22-May-17	14:24.0	17.32	96	0		0	0	168.5	4.2
3-Jul-17	14:24.0	26.549	47	0	0.0332	0	0	192.3	4.339
6-Jun-17	14:24.0	18.628	95	0	0.0341	0	0	154.4	4.237
6-Jul-17	14:24.0	22.465	75.8	0		0	0	130.6	4.339
23-Jun-17	14:24.0	27.333	46.8	0		0	0	221.8	4.345
27-May-17	14:24.0	22.393	70.1	0	0.035	0	0	37.9	4.2
19-May-17	14:24.0	17.439	93.7	0		0	0	157.2	4.206
7-Jun-17	14:24.0	25.72	61.4	0	0.0363	0	0	144.6	4.351
30-Jun-17	14:24.0	19.08	92.2	0		0	0	148.8	4.188
29-Jun-17	14:24.0	21.915	76.8	0		0	0	157.2	4.224
17-May-17	14:24.0	20.603	94.7	0	0.0401	0	0	158.6	4.212
14-Jun-17	14:24.0	30.545	46.2	0		0	0	81.4	4.339
4-Jul-17	14:24.0	24.412	63.2	0	0.0405	0	2.52	153	4.339
22-May-17	14:24.0	18.771	85.6	0	0.0405	0	0	158.6	4.224
30-Jun-17	14:24.0	20.746	83.5	0		0	0	143.2	4.2
19-Jun-17	14:24.0	23.809	63.9	0		0	0	144.6	4.369
15-May-17	14:24.0	18.152	97	0	0.0425	0	0	203.6	4.194
5-Jun-17	14:24.0	28.593	43.3	0		0	0	320.1	4.333
17-May-17	14:24.0	20.484	95.5	0	0.0442	0	0	157.2	4.206
31-May-17	14:24.0	23.352	78.3	0		0	0	154.4	4.351
1-Jul-17	14:24.0	17.082	94.4	0		0	0	155.8	4.188
9-Jun-17	14:24.0	27.924	32.6	0		0	0	148.8	4.321
17-May-17	14:24.0	20.936	92.4	0	0.0462	0	0	161.5	4.218
5-Jul-17	14:24.0	24.968	56.3	0	0.047	0	4.53	147.4	4.363
20-May-17	14:24.0	15.629	94.3	0	0.047	0	0	157.2	4.2
12-May-17	14:24.0	16.034	92.3	0	0.0474	0	0	209.2	4.2
11-May-17	14:24.0	20.698	79.3	0	0.0474	0	0	147.4	4.224
9-Jul-17	14:24.0	27.038	44.1	0	0.0474	0	0	205	4.333
7-Jun-17	14:24.0	25.234	66.3	0		0	0	151.6	4.363
6-Jul-17	14:24.0	25.768	56.1	0	0.0482	0	0	139	4.339
12-May-17	14:24.0	17.153	85.1	0	0.0482	0	0	355.2	4.224
17-May-17	14:24.0	20.317	96	0		0	0	158.6	4.2
29-Jun-17	14:24.0	21.079	80.6	0		0	0	137.6	4.2
17-May-17	14:24.0	19.984	88.8	0	0.049	0	0	158.6	4.237
4-Jul-17	14:24.0	25.793	50.9	0	0.049	0.5	4.03	214.8	4.393
19-May-17	14:24.0	19.674	72.8	0		0	0	157.2	4.224
17-May-17	14:24.0	20.507	82.6	0	0.0501	0	0	158.6	4.255
8-Jul-17	14:24.0	27.554	44.3	0	0.0501	0	4.03	132	4.375
29-May-17	14:24.0	20.079	90.9	0		0	0	162.9	4.2
12-May-17	14:24.0	15.915	93.3	0		0	0	209.2	4.2
8-Jul-17	14:24.0	25.283	60.1	0	0.0509	0	0	157.2	4.339
2-Jul-17	14:24.0	24.002	52.2	0	0.0521	0	0	154.4	4.375
12-May-17	14:24.0	21.652	77.8	0	0.0521	0	0	164.3	4.224
30-Jun-17	14:24.0	19.127	91.5	0		0	0	153	4.188
22-Jun-17	14:24.0	24.388	60.7	0		0	0	154.4	4.357
30-Jun-17	14:24.0	20.246	87.2	0		0	0	151.6	4.194
18-Jun-17	14:24.0	24.919	65.7	0		0	0	122.1	4.381
23-May-17	14:24.0	13.858	94.1	0		0	0	158.6	4.2
8-Jun-17	14:24.0	26.329	62.4	0		0	0	247.1	4.345
19-Jun-17	14:24.0	16.606	87.7	0		0	0	155.8	4.212
8-Jul-17	14:24.0	23.016	72.2	0		0	3.02	153	4.381
18-May-17	14:24.0	19.365	96	0	0.0536	0	0	151.6	4.2
29-Jun-17	14:24.0	21.843	78	0	0.0544	0	0	60.4	4.351
17-May-17	14:24.0	20.603	87.3	0	0.0544	0	0	153	4.224
23-May-17	14:24.0	27.456	55	0		0	0	155.8	4.369
3-Jun-17	14:24.0	22.968	61.9	0	0.0562	0	0	147.4	4.381
18-May-17	14:24.0	20.293	88	0	0.0562	0	0	161.5	4.224
13-May-17	14:24.0	21.151	80.4	0	0.057	0	0	164.3	4.224
16-May-17	14:24.0	27.554	70.6	0		0	0	164.3	4.4
10-Jul-17	14:24.0	27.924	45.6	0	0.0574	0	0	259.7	4.339
8-Jul-17	14:24.0	26.72	49.1	0	0.0574	0	4.03	124.9	4.321
5-Jun-17	14:24.0	27.653	47.9	0	0.0574	0	0	182.5	4.339
29-Jun-17	14:24.0	21.175	84.6	0		0	0	282.2	4.249
1-Jul-17	14:24.0	24.919	57.4	0	0.0588	0	0	141.8	4.363
6-Jun-17	14:24.0	26.158	60.4	0	0.0596	0	0	160	4.393
28-Jun-17	14:24.0	20.293	80.5	0	0.0599	0	0	198	4.267
21-May-17	14:24.0	19.341	74.4	0		0	0	155.8	4.237
22-May-17	14:24.0	19.056	85.4	0		0	0	158.6	4.249
24-May-17	14:24.0	27.776	55.9	0		0	0	91.3	4.333
16-May-17	14:24.0	22.393	82.9	0	0.0621	0	0	154.4	4.231
22-May-17	14:24.0	18.247	86.9	0	0.0632	0	0	158.6	4.224
29-Jun-17	14:24.0	21.819	78.4	0		0	0	146	4.206
23-May-17	14:24.0	14.96	91.8	0		0	0	158.6	4.212
17-May-17	14:24.0	20.293	86.1	0	0.0639	0	0	158.6	4.249
19-May-17	14:24.0	17.915	87.6	0	0.0639	0	0	165.7	4.218
11-Jun-17	14:24.0	25.793	67.6	0	0.0646	0	2.52	150.2	4.357
29-Jun-17	14:24.0	21.819	78.4	0		0	0	154.4	4.224
30-Jun-17	14:24.0	19.365	90.9	0		0	0	151.6	4.188
2-Jul-17	14:24.0	22.633	59.2	0		0	0	175.5	4.381
2-Jun-17	14:24.0	25.574	61.1	0	0.0664	0	0	165.7	4.363
10-Jul-17	14:24.0	28.568	43	0	0.0664	0	0	219	4.381
19-May-17	14:24.0	19.674	71.3	0	0.0664	0	0	160	4.224
19-May-17	14:24.0	16.773	94.6	0		0	0	157.2	4.2
19-Jun-17	14:24.0	20.841	63.9	0		0	0	158.6	4.249
19-May-17	14:24.0	17.272	91.6	0	0.0671	0	0	158.6	4.206
22-May-17	14:24.0	19.056	84.2	0	0.0678	0	0	158.6	4.224
20-May-17	14:24.0	19.27	79.2	0	0.0691	0	0	158.6	4.224
23-May-17	14:24.0	15.605	88.7	0	0.0702	0	0	158.6	4.218
22-May-17	14:24.0	16.915	94.1	0	0.0715	0	0	154.4	4.206
3-Jun-17	14:24.0	21.533	65.2	0		0	0	150.2	4.333
10-Jul-17	14:24.0	29.365	36.8	0	0.0725	0	0	272.4	4.339
15-May-17	14:24.0	18.747	98.2	0	0.0745	0	0	254.1	4.188
23-May-17	14:24.0	14.529	95.5	0	0.0752	0	0	158.6	4.2
8-Jul-17	14:24.0	27.727	39.9	0		0	4.03	126.4	4.321
9-Jul-17	14:24.0	26.353	45.8	0	0.0762	0	0	167.1	4.363
21-May-17	14:24.0	16.225	91.1	0		0	0	168.5	4.218
17-May-17	14:24.0	20.698	94.1	0	0.0768	0	0	160	4.218
3-Jul-17	14:24.0	23.256	66.6	0	0.0781	0	0	155.8	4.363
24-Jun-17	14:24.0	25.21	54.5	0		0	0	150.2	4.363
9-Jul-17	14:24.0	23.737	67.5	0		0	0	186.7	4.363
23-Jun-17	14:24.0	27.974	36.3	0		0	0	266.7	4.333
6-Jun-17	14:24.0	27.308	51.2	0		0	0	140.4	4.339
12-May-17	14:24.0	18.58	82.4	0	0.0803	0	0	11.2	4.224
13-Jun-17	14:24.0	27.702	61.3	0		0	0	106.7	4.339
3-Jun-17	14:24.0	24.267	60.9	0	0.081	0	0	151.6	4.339
22-Jun-17	14:24.0	24.653	53.5	0		0	0	126.4	4.345
1-Jun-17	14:24.0	26.842	58.5	0		0	0	144.6	4.339
19-May-17	14:24.0	19.651	71.2	0		0	0	160	4.224
20-Jun-17	14:24.0	25.21	39.4	0		0	0	172.7	4.393
23-May-17	14:24.0	28.369	51.2	0		0	0	129.2	4.339
13-May-17	14:24.0	20.007	84.3	0	0.0857	0	0	164.3	4.218
9-Jul-17	14:24.0	25.695	55.2	0	0.0875	0	0	172.7	4.333
19-Jun-17	14:24.0	26.085	48	0		0	0	155.8	4.393
6-Jul-17	14:24.0	25.623	56.2	0		0	0	132	4.339
23-May-17	14:24.0	19.555	75.6	0	0.0887	0	0	151.6	4.224
15-May-17	14:24.0	19.651	98.4	0	0.0896	0	0	140.4	4.218
23-Jun-17	14:24.0	28.742	38.7	0		0	0	226	4.315
5-Jul-17	14:24.0	22.944	63.5	0		0	0	129.2	4.333
15-Jun-17	14:24.0	26.231	65.3	0		0	0	110.9	4.333
6-Jun-17	14:24.0	24.363	73.4	0	0.0908	0	2.01	150.2	4.351
18-May-17	14:24.0	22.178	74.9	0	0.0908	0	0	157.2	4.224
16-May-17	14:24.0	22.345	84	0	0.0908	0	0	158.6	4.224
4-Jul-17	14:24.0	25.089	56	0	0.092	0	2.52	182.5	4.333
6-Jul-17	14:24.0	16.463	93.4	0		0	0	146	4.2
23-May-17	14:24.0	13.954	94.8	0	0.0932	0	0	158.6	4.2
6-Jul-17	14:24.0	18.628	92.2	0		0	0	161.5	4.297
3-Jul-17	14:24.0	23.905	59.7	0	0.0955	0	0	189.5	4.345
2-Jun-17	14:24.0	23.184	76.8	0	0.0955	0	1.01	182.5	4.345
2-Jun-17	14:24.0	25.428	57.7	0		0	0	151.6	4.321
14-May-17	14:24.0	19.603	95.3	0		0	0	171.3	4.194
13-May-17	14:24.0	19.912	92.5	0	0.0961	0	0	151.6	4.237
23-May-17	14:24.0	19.532	77.9	0	0.0969	0	0	151.6	4.237
18-May-17	14:24.0	22.705	74.9	0		0	0	160	4.255
8-Jun-17	14:24.0	24.291	71.8	0	0.0981	0	0	336.9	4.345
24-May-17	14:24.0	13.81	92.2	0	0.1003	0	0	158.6	4.206
17-Jun-17	14:24.0	25.21	58.6	0.2		0.5	5.03	139	4.339
1-Jun-17	14:24.0	21.748	82.6	0		0	0.5	127.8	4.357
3-Jun-17	14:24.0	24.605	58.1	0		0	0	151.6	4.351
16-Jun-17	14:24.0	28.32	48.6	0		0	0	190.9	4.381
17-Jun-17	14:24.0	26.036	52.6	0		0	0	150.2	4.381
17-Jun-17	14:24.0	26.549	52	0		0	0	147.4	4.345
8-Jun-17	14:24.0	25.283	66.6	0		0	0	9.8	4.321
23-May-17	14:24.0	26.695	59.1	0		0	0	144.6	4.333
4-Jun-17	14:24.0	26.549	54.2	0		0	0	144.6	4.333
21-May-17	14:24.0	19.103	77	0	0.1053	0	0	155.8	4.224
20-May-17	14:24.0	18.913	85.8	0		0	0	154.4	4.224
26-Jun-17	14:24.0	17.843	86.5	0	0.1064	0	0	157.2	4.206
21-May-17	14:24.0	16.32	93.6	0		0	0	169.9	4.206
6-Jul-17	14:24.0	17.296	93.9	0		0	0	161.5	4.188
21-May-17	14:24.0	16.034	94.4	0		0	0	169.9	4.2
24-May-17	14:24.0	13.425	93.5	0	0.108	0	0	158.6	4.2
4-Jun-17	14:24.0	25.768	63.4	0.2	0.1085	0	0	133.4	4.375
13-Jun-17	14:24.0	27.949	59.5	0		0	0	94.1	4.393
18-May-17	14:24.0	21.987	78.6	0	0.1091	0	0	160	4.243
24-May-17	14:24.0	21.557	70.9	0	0.1101	0	0	167.1	4.237
31-May-17	14:24.0	22.106	78.8	0		0	0	179.7	4.333
14-May-17	14:24.0	21.032	85.4	0	0.1107	0	0	151.6	4.224
4-Jul-17	14:24.0	26.231	53.2	0	0.1112	0	1.51	183.9	4.321
16-May-17	14:24.0	21.676	83.4	0	0.1128	0	0	160	4.237
18-Jun-17	14:24.0	27.284	49.8	0		0	0	143.2	4.393
16-May-17	14:24.0	20.698	97.8	0		0	0	181.1	4.321
14-Jun-17	14:24.0	27.014	62.9	0		0	0	53.3	4.321
22-May-17	14:24.0	25.695	67.1	0		0	0	134.8	4.333
31-Oct-17	14:24.0	16.463	83.4	0	0.1143	0	0	88.4	4.176
19-May-17	14:24.0	18.509	85.3	0	0.1148	0	0	174.1	4.249
31-Oct-17	14:24.0	18.675	80.9	0	0.1148	0	0	96.9	4.176
31-Oct-17	14:24.0	21.342	66.6	0	0.1148	0	0	133.4	4.285
31-Oct-17	14:24.0	22.298	60.8	0	0.1148	0	0	144.6	4.339
31-Oct-17	14:24.0	25.089	54.3	0	0.1148	0	0	134.8	4.339
31-Oct-17	14:24.0	25.866	49.2	0	0.1148	0	5.54	129.2	4.369
31-Oct-17	14:24.0	16.915	80.8	0	0.1148	0	1.01	98.3	4.176
21-May-17	14:24.0	26.891	49.7	0		0	0	153	4.363
7-Jun-17	14:24.0	23.881	70.4	0		0	0	151.6	4.375
6-Jul-17	14:24.0	23.569	63.9	0		0	0	134.8	4.387
31-Oct-17	14:24.0	18.937	77.7	0	0.1153	0.5	4.53	133.4	4.194
30-Oct-17	14:24.0	17.891	94.3	0	0.1153	0	0	148.8	4.206
30-Oct-17	14:24.0	18.509	93.3	0	0.1153	0	0	144.6	4.357
30-Oct-17	14:24.0	19.127	91.5	0	0.1153	0	0	141.8	4.363
30-Oct-17	14:24.0	20.555	81	0	0.1153	0	0	133.4	4.357
31-Oct-17	14:24.0	26.646	45.2	0	0.1153	0	0	134.8	4.339
31-Oct-17	14:24.0	18.2	79.8	0	0.1153	0	4.53	127.8	4.188
31-Oct-17	14:24.0	17.962	78.3	0	0.1153	0	3.02	130.6	4.182
31-Oct-17	14:24.0	27.087	44	0	0.1153	0	0	146	4.369
30-Oct-17	14:24.0	20.269	86.2	0	0.1153	0	0	139	4.363
30-Oct-17	14:24.0	25.841	59.3	0	0.1159	0	2.52	122.1	4.357
1-Nov-17	14:24.0	18.485	85.6	0	0.1159	0	0	126.4	4.176
31-Oct-17	14:24.0	20.007	78.3	0	0.1159	0	4.03	133.4	4.2
30-Oct-17	14:24.0	20.722	75.9	0	0.1159	0	3.52	127.8	4.2
30-Oct-17	14:24.0	20.865	75.9	0	0.1159	0	0	133.4	4.206
30-Oct-17	14:24.0	21.056	75.6	0	0.1159	0	3.52	129.2	4.206
30-Oct-17	14:24.0	21.819	72.8	0	0.1159	0.5	5.54	123.5	4.224
1-Nov-17	14:24.0	23.16	71.3	0	0.1159	0	0	129.2	4.333
30-Oct-17	14:24.0	25.404	55.4	0	0.1159	1.01	5.54	109.5	4.345
30-Oct-17	14:24.0	23.905	65.6	0	0.1159	0	0	126.4	4.357
30-Oct-17	14:24.0	23.905	67	0	0.1159	0	0	136.2	4.357
30-Oct-17	14:24.0	21.461	75.2	0	0.1159	0	0	146	4.369
30-Oct-17	14:24.0	17.296	94.4	0	0.1159	0	0	148.8	4.17
30-Oct-17	14:24.0	17.32	93.8	0	0.1159	0	0	148.8	4.17
30-Oct-17	14:24.0	17.534	94.2	0	0.1159	0	0	150.2	4.17
1-Nov-17	14:24.0	26.085	63.1	0	0.1164	0	4.03	129.2	4.321
31-Oct-17	14:24.0	28.941	42.3	0	0.1164	0	0	136.2	4.369
30-Oct-17	14:24.0	21.294	76.5	0	0.1164	0.5	4.03	126.4	4.218
1-Nov-17	14:24.0	19.912	85.9	0	0.1164	0	0	129.2	4.2
1-Nov-17	14:24.0	21.676	78.5	0	0.1164	0	0	129.2	4.351
1-Nov-17	14:24.0	27.431	59.6	0	0.1164	1.01	5.03	139	4.369
30-Oct-17	14:24.0	22.753	66.4	0	0.1164	0.5	4.53	124.9	4.249
30-Oct-17	14:24.0	23.978	60	0	0.1164	0.5	5.03	132	4.291
30-Oct-17	14:24.0	17.582	95.5	0	0.1164	0	0	143.2	4.17
31-Oct-17	14:24.0	29.615	42.1	0	0.1164	0	0	150.2	4.363
1-Nov-17	14:24.0	18.961	80.5	0	0.1169	0	0	134.8	4.188
31-Oct-17	14:24.0	29.065	41.9	0	0.1169	0	0	132	4.333
1-Nov-17	14:24.0	21.008	74.3	0	0.1169	0	0	132	4.2
1-Nov-17	14:24.0	19.532	78.9	0	0.1169	0	0	134.8	4.194
29-Oct-17	14:24.0	18.438	94.7	0	0.1169	0	6.04	147.4	4.17
1-Nov-17	14:24.0	18.699	82.5	0	0.1169	0	0	134.8	4.182
30-Oct-17	14:24.0	17.582	95.9	0	0.1169	0	0	137.6	4.17
29-Oct-17	14:24.0	18.366	94.1	0	0.1169	0	0	143.2	4.17
29-Oct-17	14:24.0	18.033	94.8	0.2	0.1169	0	0	143.2	4.17
30-Oct-17	14:24.0	17.677	95.3	0.4	0.1169	0	0	137.6	4.2
1-Nov-17	14:24.0	20.222	76.8	0	0.1169	0	0	136.2	4.2
29-Oct-17	14:24.0	19.056	95.9	0	0.1169	0	0	147.4	4.176
29-Oct-17	14:24.0	19.008	95.3	0.2	0.1169	0	0	151.6	4.17
30-Oct-17	14:24.0	17.344	96	0.2	0.1169	0	0	141.8	4.17
29-Oct-17	14:24.0	18.913	96.7	0	0.1169	0	0	143.2	4.188
21-May-17	14:24.0	26.085	56.1	0		0	0	146	4.393
1-Jun-17	14:24.0	25.04	63.5	0		0	0	165.7	4.333
1-Jun-17	14:24.0	24.605	65	0		0	0	120.7	4.339
2-Nov-17	14:24.0	26.012	67.9	0	0.1174	0	3.52	113.7	4.333
31-Oct-17	14:24.0	28.023	42.1	0	0.1174	0	0	112.3	4.315
31-Oct-17	14:24.0	23.376	55.9	0	0.1174	0	0	132	4.212
31-Oct-17	14:24.0	23.497	52.6	0	0.1174	0	0	137.6	4.206
31-Oct-17	14:24.0	23.208	60.1	0	0.1174	0	0	133.4	4.206
29-Oct-17	14:24.0	18.247	97.1	0	0.1174	0	0	148.8	4.249
2-Nov-17	14:24.0	20.889	82.6	0	0.1174	0.5	4.03	132	4.188
29-Oct-17	14:24.0	18.509	97.1	0	0.1174	0	0	146	4.206
1-Nov-17	14:24.0	29.464	53.5	0	0.1174	0	0	141.8	4.321
29-Oct-17	14:24.0	18.295	97.2	0	0.1174	0	0	146	4.273
29-Oct-17	14:24.0	18.628	95.2	0.4	0.1174	0	0	148.8	4.17
25-Mar-18	49:17.0	22.753	98.5	0.2	0.1179	0	0	228.8	4.14
24-Mar-18	49:17.0	25.283	91.9	3.4	0.1179	0	1.51	189.5	4.363
25-Mar-18	49:17.0	29.14	79	0	0.1179	0	1.51	285	4.327
25-Mar-18	49:17.0	33.001	62	0	0.1179	0	1.01	300.4	4.381
29-Oct-17	14:24.0	18.224	95.8	1	0.1179	0	0	144.6	4.17
29-Oct-17	14:24.0	17.938	96	1.8	0.1179	0	0	147.4	4.17
2-Nov-17	14:24.0	28.394	58.6	0	0.1179	1.01	4.53	102.5	4.321
29-Oct-17	14:24.0	17.843	96.6	0	0.1179	0	0	141.8	4.261
2-Nov-17	14:24.0	30.849	48.8	0	0.1179	1.01	5.03	102.5	4.321
2-Nov-17	14:24.0	23.424	77.8	0	0.1179	1.01	4.03	140.4	4.351
29-Oct-17	14:24.0	18.105	97	0.2	0.1179	0	0	146	4.285
29-Oct-17	14:24.0	18.247	97.1	0	0.1179	0	0	140.4	4.339
2-Nov-17	14:24.0	21.342	81.1	0	0.1179	0	3.52	126.4	4.188
2-Nov-17	14:24.0	30.091	52.9	0	0.1179	1.01	4.53	99.7	4.363
1-Nov-17	14:24.0	28.99	51.6	0	0.1179	0	0	127.8	4.393
1-Nov-17	14:24.0	29.389	49.8	0	0.1179	0	0	133.4	4.345
31-Oct-17	14:24.0	22.178	69.6	0	0.1179	0	0	129.2	4.2
2-Nov-17	14:24.0	22.274	74	0	0.1179	1.01	5.54	127.8	4.2
2-Nov-17	14:24.0	20.055	85.3	0	0.1179	0	3.02	130.6	4.182
2-Nov-17	14:24.0	21.533	84.8	0	0.1179	0	2.52	134.8	4.2
31-Oct-17	14:24.0	24.653	50.1	0	0.1179	0	0	134.8	4.218
31-Oct-17	14:24.0	25.428	46.6	0	0.1179	0	0	130.6	4.237
31-Oct-17	14:24.0	26.646	44	0	0.1179	0	0	123.5	4.267
30-Jun-17	14:24.0	24.436	65.1	0		0	0	147.4	4.333
27-May-17	14:24.0	31.51	41.9	0		0	0	29.5	4.393
24-Mar-18	49:17.0	34.598	50.2	0	0.1184	0	2.52	306.1	4.321
24-Mar-18	49:17.0	35.208	47.9	0	0.1184	0	1.51	346.8	4.303
25-Mar-18	49:17.0	22.968	97.7	0	0.1184	0	0	228.8	4.164
25-Mar-18	49:17.0	22.561	97.8	0	0.1184	0	0	228.8	4.158
25-Mar-18	49:17.0	22.226	98.1	0	0.1184	0	0	228.8	4.152
25-Mar-18	49:17.0	22.058	98.3	0	0.1184	0	0	228.8	4.152
25-Mar-18	49:17.0	26.28	90.8	0	0.1184	0	1.01	262.5	4.2
25-Mar-18	49:17.0	35.985	49.6	0	0.1184	0	2.01	342.6	4.339
25-Mar-18	49:17.0	36.851	42.2	0	0.1184	0	2.01	317.3	4.339
25-Mar-18	49:17.0	21.604	98.4	0	0.1184	0	0	228.8	4.158
16-Oct-17	14:24.0	32.021	22.8	0	0.1184	0.5	6.04	42.1	4.303
1-Nov-17	14:24.0	31.331	48	0	0.1184	1.01	9.56	109.5	4.339
16-Oct-17	14:24.0	17.986	57.6	0	0.1184	0	0	137.6	4.182
29-Oct-17	14:24.0	17.772	96.3	1.6	0.1184	0	0	148.8	4.17
29-Oct-17	14:24.0	18.319	95.7	0.2	0.1184	0	3.02	140.4	4.17
1-Nov-17	14:24.0	29.54	49.5	0	0.1184	1.01	5.54	124.9	4.339
29-Oct-17	14:24.0	17.891	96.4	1.2	0.1184	0	0	146	4.237
2-Nov-17	14:24.0	31.026	45.6	0	0.1184	0.5	3.52	102.5	4.339
16-Oct-17	14:24.0	28.245	33.2	0	0.1184	0	0.5	7	4.2
15-Oct-17	14:24.0	27.087	48.7	0	0.1184	1.01	4.03	122.1	4.393
15-Oct-17	14:24.0	21.27	72.1	0	0.1184	0	1.51	120.7	4.2
1-Nov-17	14:24.0	29.215	49.8	0	0.1184	1.51	5.03	124.9	4.321
1-Nov-17	14:24.0	27.727	51.5	0	0.1184	1.51	7.05	129.2	4.273
2-Nov-17	14:24.0	22.992	68.4	0	0.1184	1.01	6.04	124.9	4.2
2-Nov-17	14:24.0	31.128	47.5	0	0.1184	1.01	6.54	109.5	4.381
28-Oct-17	14:24.0	24.363	75.1	0	0.1184	0	0	137.6	4.231
28-Oct-17	14:24.0	27.998	61.1	0	0.1184	0	0	144.6	4.321
2-Nov-17	14:24.0	21.461	79.5	0	0.1184	0.5	3.52	130.6	4.2
24-Mar-18	49:17.0	23.497	97.5	0	0.1189	0	0	228.8	4.17
24-Mar-18	49:17.0	21.557	97.1	0	0.1189	0	0	329.9	4.152
26-Mar-18	49:17.0	23.93	90.8	0	0.1189	0	0	263.9	4.152
26-Mar-18	49:17.0	25.113	89.2	0	0.1189	0	0.5	292	4.134
24-Mar-18	49:17.0	25.939	94.1	1	0.1189	0	1.01	224.6	4.285
24-Mar-18	49:17.0	27.087	95.1	0	0.1189	0	0	228.8	4.255
26-Mar-18	49:17.0	28.245	79.3	0	0.1189	0	1.51	304.7	4.146
26-Mar-18	49:17.0	31.893	64.2	0	0.1189	0	2.01	314.5	4.333
26-Mar-18	49:17.0	33.966	54.9	0	0.1189	0	2.52	349.6	4.345
24-Mar-18	49:17.0	25.065	96.2	0	0.1189	0	0	228.8	4.2
24-Mar-18	49:17.0	24.581	96.5	0	0.1189	0	0	228.8	4.194
24-Mar-18	49:17.0	24.05	97.2	0	0.1189	0	0	228.8	4.176
25-Mar-18	49:17.0	27.333	90.9	2.4	0.1189	0	3.02	183.9	4.339
24-Mar-18	49:17.0	28.097	79.2	0	0.1189	0	1.51	282.2	4.333
26-Mar-18	49:17.0	36.281	48.8	0	0.1189	0	2.01	338.3	4.309
25-Mar-18	49:17.0	38.115	39.1	0	0.1189	0	1.51	328.5	4.357
24-Mar-18	49:17.0	24.219	96.8	0	0.1189	0	0	228.8	4.182
24-Mar-18	49:17.0	25.72	89.9	0	0.1189	0	0.5	336.9	4.206
24-Mar-18	49:17.0	35.636	53.6	0	0.1189	0	3.52	315.9	4.321
24-Mar-18	49:17.0	25.574	95.6	0	0.1189	0	0	228.8	4.237
26-Mar-18	49:17.0	23.136	94.6	0	0.1189	0	0	263.9	4.14
24-Mar-18	49:17.0	21.795	96.7	0	0.1189	0	0	329.9	4.152
26-Mar-18	49:17.0	23.088	94	0	0.1189	0	0	263.9	4.146
26-Mar-18	49:17.0	23.665	91.7	0	0.1189	0	0	263.9	4.152
24-Mar-18	49:17.0	32.768	64.5	0	0.1189	0	1.51	293.4	4.327
24-Mar-18	49:17.0	22.705	97.3	0	0.1189	0	0	329.9	4.146
15-Oct-17	14:24.0	18.247	86.6	0	0.1189	0	0.5	119.3	4.206
27-Oct-17	14:24.0	30.646	41.3	0	0.1189	3.52	9.06	44.9	4.291
28-Oct-17	14:24.0	31.74	43	0	0.1189	2.01	8.05	141.8	4.315
28-Oct-17	14:24.0	31.612	41.9	0	0.1189	1.51	6.54	140.4	4.321
28-Oct-17	14:24.0	28.891	51	0	0.1189	0	8.05	132	4.333
28-Oct-17	14:24.0	29.74	53.7	0	0.1189	0	5.54	141.8	4.315
27-Oct-17	14:24.0	29.065	42.7	0	0.1189	0	4.03	35.1	4.176
28-Oct-17	14:24.0	25.331	69	0	0.1189	0	7.55	144.6	4.291
28-Oct-17	14:24.0	23.28	76.4	0	0.1189	0	0	147.4	4.243
1-Nov-17	14:24.0	24.315	61.4	0	0.1189	0	4.53	124.9	4.2
1-Nov-17	14:24.0	24.944	59.3	0	0.1189	0	0	119.3	4.206
16-Oct-17	14:24.0	23.472	46.2	0	0.1189	0	0	122.1	4.188
15-Oct-17	14:24.0	15.414	86.4	0	0.1189	0	0	119.3	4.188
28-Oct-17	14:24.0	31.97	48.6	0	0.1189	0	0	144.6	4.327
15-Oct-17	14:24.0	24.677	58.6	0	0.1189	0.5	3.52	115.1	4.249
16-Oct-17	14:24.0	31.103	26.7	0	0.1189	0	0	7	4.237
28-Oct-17	14:24.0	26.695	65.4	0	0.1189	0	4.53	143.2	4.333
28-Oct-17	14:24.0	25.016	72	0	0.1189	0	0	137.6	4.249
29-Oct-17	14:24.0	17.915	96.5	0.8	0.1189	0	0	137.6	4.255
28-Oct-17	14:24.0	23.641	76.9	0	0.1189	0	0	137.6	4.176
28-Oct-17	14:24.0	23.617	75.6	0	0.1189	0	0	134.8	4.176
29-Oct-17	14:24.0	19.199	93.8	0	0.1189	0	1.01	147.4	4.188
29-Oct-17	14:24.0	18.913	94.6	0.2	0.1189	0	0	150.2	4.218
29-Oct-17	14:24.0	18.794	95	0.2	0.1189	0	0	143.2	4.182
29-Oct-17	14:24.0	18.533	95.2	0.4	0.1189	0	0	143.2	4.176
25-Oct-17	14:24.0	30.545	42.7	0	0.1189	0	0	94.1	4.291
27-Oct-17	14:24.0	35.823	31.1		0.1189	0	0	44.9	4.297
23-Oct-17	14:24.0	20.603	85.4	0	0.1189	0	0	132	4.176
16-Oct-17	14:24.0	18.176	58.1	0	0.1189	0	0	137.6	4.188
14-Oct-17	14:24.0	26.182	43.7	0	0.1189	1.51	8.56	124.9	4.339
24-Oct-17	14:24.0	29.79	58.5	0	0.1189	0	3.52	99.7	4.327
24-Oct-17	14:24.0	22.609	84.1	0	0.1189	0	0	117.9	4.273
24-Oct-17	14:24.0	21.199	87	0	0.1189	0	0	117.9	4.182
14-Oct-17	14:24.0	21.056	74	0	0.1189	1.51	6.04	134.8	4.243
28-Oct-17	14:24.0	21.7	81	0	0.1189	0	1.51	137.6	4.224
28-Oct-17	14:24.0	23.497	74.6	0	0.1189	0	0	136.2	4.182
23-Oct-17	14:24.0	20.412	86.1	0	0.1189	0	0	134.8	4.17
23-Oct-17	14:24.0	20.627	86.4	0	0.1189	0	0	136.2	4.176
23-Oct-17	14:24.0	22.13	84.1	0	0.1189	0	0	132	4.285
23-Oct-17	14:24.0	24.171	75.9	0	0.1189	0.5	4.03	133.4	4.363
23-Oct-17	14:24.0	24.919	69.5	0	0.1189	0.5	5.03	127.8	4.351
23-Oct-17	14:24.0	28.394	58.5	0	0.1189	0	0	139	4.321
14-Oct-17	14:24.0	18.509	84.1	0	0.1189	0.5	4.53	136.2	4.188
26-Oct-17	14:24.0	34.677	32.5	0	0.1189	3.52	10.57	39.3	4.315
2-Nov-17	14:24.0	31.561	44.1	0	0.1189	0.5	3.52	95.5	4.321
1-Nov-17	14:24.0	25.38	57.2	0	0.1189	0	0	126.4	4.206
2-Nov-17	14:24.0	31.357	45.7	0	0.1189	0.5	4.53	99.7	4.345
25-Oct-17	14:24.0	37.206	26.6	0	0.1189	0	0	37.9	4.387
1-Nov-17	14:24.0	25.671	56.2	0	0.1189	0	0	126.4	4.206
1-Nov-17	14:24.0	26.085	55.9	0	0.1189	0	5.03	129.2	4.218
25-Oct-17	14:24.0	32.355	39.2	0	0.1189	0.5	7.05	57.6	4.339
25-Oct-17	14:24.0	23.809	71.7	0	0.1189	0	0	132	4.188
24-Oct-17	14:24.0	31.535	44.3	0	0.1189	1.01	5.03	80	4.387
6-Jul-17	14:24.0	16.963	93.8	0		0	0	146	4.194
6-Jul-17	14:24.0	23.16	70.7	0		0	0	148.8	4.327
27-Mar-18	49:17.0	31.001	72.1	0	0.1194	0	1.01	22.5	4.357
26-Mar-18	49:17.0	37.811	44.4	0	0.1194	0	2.01	314.5	4.333
27-Mar-18	49:17.0	25.987	88.5	0	0.1194	0	0	348.2	4.218
25-Mar-18	49:17.0	27.653	78.4	1.2	0.1194	0	1.01	127.8	4.363
25-Mar-18	49:17.0	25.016	88.4	0	0.1194	0	0	247.1	4.164
25-Mar-18	49:17.0	25.113	89.5	0	0.1194	0	0	240.1	4.17
25-Mar-18	49:17.0	24.919	90.7	0	0.1194	0	0	240.1	4.176
24-Mar-18	49:17.0	25.186	95.7	0	0.1194	0	0	228.8	4.224
24-Mar-18	49:17.0	21.987	96.2	0	0.1194	0	0	329.9	4.158
25-Mar-18	49:17.0	31.842	74.9	0	0.1194	0	0	205	4.315
26-Mar-18	49:17.0	33.966	52.3	0	0.1194	0	2.52	8.4	4.285
24-Mar-18	49:17.0	25.113	95.6	0	0.1194	0	0	228.8	4.206
27-Mar-18	49:17.0	25.574	91.6	0	0.1194	0	0	348.2	4.146
24-Mar-18	49:17.0	24.243	89.1	5.2	0.1194	0	2.01	164.3	4.267
24-Mar-18	49:17.0	22.274	94.9	0	0.1194	0	0	329.9	4.17
24-Mar-18	49:17.0	22.082	95.7	0	0.1194	0	0	329.9	4.164
26-Mar-18	49:17.0	24.484	90.4	0	0.1194	0	0	263.9	4.158
17-Oct-17	14:24.0	31.561	24.4	0	0.1194	0	0	11.2	4.309
21-Oct-17	14:24.0	24.605	81.6	0	0.1194	0.5	3.52	120.7	4.249
21-Oct-17	14:24.0	27.308	70.7	0	0.1194	1.01	4.53	117.9	4.339
21-Oct-17	14:24.0	30.041	59.1	0	0.1194	0	3.02	108.1	4.351
17-Oct-17	14:24.0	27.924	30.1	0	0.1194	0	0	44.9	4.188
17-Oct-17	14:24.0	30.243	26.9	0	0.1194	0	0	352.4	4.231
28-Oct-17	14:24.0	20.46	88.3	0	0.1194	0	0	147.4	4.2
28-Oct-17	14:24.0	19.746	89.8	0	0.1194	0	9.56	148.8	4.2
28-Oct-17	14:24.0	19.484	91.6	0.2	0.1194	0	0	155.8	4.2
29-Oct-17	14:24.0	19.365	93.1	0.2	0.1194	0	0	150.2	4.2
17-Oct-17	14:24.0	36.905	20.3	0	0.1194	2.01	6.04	355.2	4.303
1-Nov-17	14:24.0	26.646	53.8	0	0.1194	1.51	5.54	129.2	4.237
17-Oct-17	14:24.0	28.593	28.4	0	0.1194	0	0	2.8	4.194
24-Oct-17	14:24.0	25.21	74.1	0	0.1194	0.5	3.52	115.1	4.339
25-Oct-17	14:24.0	20.722	75.9	0	0.1194	0	0	139	4.176
25-Oct-17	14:24.0	21.557	68.9	0	0.1194	0	0	140.4	4.182
25-Oct-17	14:24.0	24.171	63.2	0	0.1194	0	0	112.3	4.188
26-Oct-17	14:24.0	29.215	41.7	0	0.1194	0	0	42.1	4.176
26-Oct-17	14:24.0	30.419	38.2	0	0.1194	1.01	10.57	39.3	4.218
14-Oct-17	14:24.0	29.414	35.1	0	0.1194	1.51	8.05	123.5	4.369
14-Oct-17	14:24.0	24.412	49.2	0	0.1194	0.5	6.04	127.8	4.339
14-Oct-17	14:24.0	22.705	59.4	0	0.1194	0.5	6.04	133.4	4.339
23-Oct-17	14:24.0	22.753	77.4	0	0.1194	0	0	130.6	4.188
25-Oct-17	14:24.0	27.407	59.4	0	0.1194	0	0	119.3	4.249
24-Oct-17	14:24.0	33.678	36.3	0	0.1194	0	0	40.7	4.333
26-Oct-17	14:24.0	28.916	41.1	0	0.1194	0	0	35.1	4.176
24-Oct-17	14:24.0	20.269	85.2	0	0.1194	0	0	130.6	4.176
23-Oct-17	14:24.0	31.052	52.9	0	0.1194	0	0	147.4	4.357
13-Oct-17	14:24.0	30.192	31	0	0.1194	2.52	7.55	129.2	4.363
28-Oct-17	14:24.0	23.569	71.1	0	0.1194	0	0	140.4	4.188
26-Oct-17	14:24.0	31.97	35.9	0	0.1194	3.02	9.06	29.5	4.237
26-Oct-17	14:24.0	29.64	38	0	0.1194	0	0	32.3	4.176
28-Oct-17	14:24.0	21.246	84.6	0	0.1194	0	0	143.2	4.206
26-Oct-17	14:24.0	35.743	29.3	0	0.1194	2.01	9.06	44.9	4.357
26-Oct-17	14:24.0	38.672	23.5	0	0.1194	2.01	7.55	47.7	4.303
23-Oct-17	14:24.0	21.509	82.4	0	0.1194	0	0	132	4.182
16-Oct-17	14:24.0	38.476	12.2	0	0.1194	0.5	4.53	56.2	4.363
28-Oct-17	14:24.0	23.857	72.3	0	0.1194	0	0	136.2	4.188
15-Oct-17	14:24.0	31.281	34	0	0.1194	0	5.03	116.5	4.339
15-Oct-17	14:24.0	28.791	41.3	0	0.1194	0	3.52	126.4	4.369
15-Oct-17	14:24.0	15.676	84.1	0	0.1194	0	0.5	119.3	4.182
25-Oct-17	14:24.0	37.728	24.6	0	0.1194	0	0	57.6	4.303
16-Oct-17	14:24.0	17.962	55.1	0	0.1194	0	0	137.6	4.188
16-Oct-17	14:24.0	37.069	13.5	0	0.1194	1.01	5.03	51.9	4.327
16-Oct-17	14:24.0	35.448	18.3	0	0.1194	1.01	7.05	30.9	4.381
27-Oct-17	14:24.0	39.403	20.3	0	0.1194	0	0	43.5	4.363
27-Oct-17	14:24.0	37.949	25.7	0	0.1194	0	0	49.1	4.333
27-Oct-17	14:24.0	34.045	34.6	0	0.1194	2.52	8.56	43.5	4.345
27-Oct-17	14:24.0	29.515	42.7	0	0.1194	1.51	7.55	33.7	4.2
25-Oct-17	14:24.0	34.308	34.5	0	0.1194	0.5	7.05	47.7	4.309
27-Oct-17	14:24.0	30.773	38.5	0	0.1194	2.01	10.57	16.8	4.182
27-Oct-17	14:24.0	29.74	40.5	0	0.1194	3.52	9.56	25.3	4.176
21-May-17	14:24.0	14.936	94.7	0		0	0	155.8	4.2
5-Jun-17	14:24.0	19.08	74.3	0		0	0	161.5	4.231
26-May-17	14:24.0	23.4	60.2	0		0	0	162.9	4.237
23-Mar-18	49:17.0	22.13	94.3	0	0.1199	0	0	329.9	4.206
27-Mar-18	49:17.0	24.315	95.7	0	0.1199	0	0	348.2	4.14
27-Mar-18	49:17.0	24.992	94.1	0	0.1199	0	0	348.2	4.134
27-Mar-18	49:17.0	23.833	95.7	0	0.1199	0	0	348.2	4.146
27-Mar-18	49:17.0	23.93	94.7	0	0.1199	0	0	348.2	4.152
27-Mar-18	49:17.0	24.388	92.9	0	0.1199	0	0	348.2	4.152
23-Mar-18	49:17.0	22.417	93	0	0.1199	0	0	329.9	4.182
26-Mar-18	49:17.0	28.122	65.5	0	0.1199	0	2.52	4.2	4.291
23-Mar-18	49:17.0	22.729	91.3	0	0.1199	0	0	329.9	4.194
27-Mar-18	49:17.0	27.825	82.7	0	0.1199	0	0	348.2	4.339
25-Mar-18	49:17.0	31.357	66.9	0	0.1199	0	0	205	4.273
25-Mar-18	49:17.0	29.615	71.2	0	0.1199	0	1.01	279.4	4.237
25-Mar-18	49:17.0	28.295	74.8	0	0.1199	0	0	252.7	4.218
25-Mar-18	49:17.0	26.549	81.7	0	0.1199	0	0	240.1	4.2
25-Mar-18	49:17.0	26.402	81.8	0	0.1199	0	0	240.1	4.194
25-Mar-18	49:17.0	25.307	86.3	0	0.1199	0	0	240.1	4.182
27-Mar-18	49:17.0	33.313	62.6	0	0.1199	0	1.01	99.7	4.321
27-Mar-18	49:17.0	32.975	64.2	0	0.1199	0	1.01	94.1	4.345
14-Oct-17	14:24.0	16.487	85.8	0	0.1199	0	3.02	137.6	4.182
13-Oct-17	14:24.0	31.816	28.5	0	0.1199	3.02	10.07	126.4	4.363
26-Oct-17	14:24.0	39.065	21	0	0.1199	3.52	8.05	40.7	4.327
26-Oct-17	14:24.0	30.318	35.4	0	0.1199	0	0	29.5	4.182
26-Oct-17	14:24.0	31.128	33.3	0	0.1199	0	0	32.3	4.188
26-Oct-17	14:24.0	31.281	33.2	0	0.1199	0	0	44.9	4.188
15-Oct-17	14:24.0	33.053	24.9	0	0.1199	1.01	4.03	116.5	4.369
14-Oct-17	14:24.0	17.891	81.2	0	0.1199	1.01	4.03	133.4	4.188
14-Oct-17	14:24.0	17.225	83.7	0	0.1199	0.5	3.52	136.2	4.188
24-Oct-17	14:24.0	35.022	32.6	0	0.1199	0.5	4.53	57.6	4.387
25-Oct-17	14:24.0	37.178	25.9	0	0.1199	1.01	8.05	103.9	4.285
14-Oct-17	14:24.0	28.866	32.3	0	0.1199	2.01	6.54	120.7	4.339
24-Oct-17	14:24.0	22.082	76.5	0	0.1199	0	0	109.5	4.188
24-Oct-17	14:24.0	21.127	81.4	0	0.1199	0	0	108.1	4.176
15-Oct-17	14:24.0	15.986	80.9	0	0.1199	0	0	119.3	4.188
15-Oct-17	14:24.0	18.247	72.7	0	0.1199	0	1.01	115.1	4.2
25-Oct-17	14:24.0	25.283	49.9	0	0.1199	0	0	127.8	4.194
15-Oct-17	14:24.0	17.605	77	0	0.1199	0	0.5	119.3	4.194
24-Oct-17	14:24.0	36.119	30.3	0	0.1199	1.01	5.54	92.7	4.315
13-Oct-17	14:24.0	31.765	25.2	0	0.1199	3.02	9.56	134.8	4.363
18-Oct-17	14:24.0	34.836	31.1	0	0.1199	1.51	7.05	117.9	4.339
25-Oct-17	14:24.0	36.661	30.7	0	0.1199	0.5	5.54	47.7	4.345
14-Oct-17	14:24.0	26.867	40.6	0	0.1199	2.52	8.05	130.6	4.351
25-Oct-17	14:24.0	25.671	53.9	0	0.1199	0	0	106.7	4.188
21-Oct-17	14:24.0	34.916	38.9	0	0.1199	1.01	4.03	77.2	4.363
27-Oct-17	14:24.0	31.331	37	0	0.1199	0.5	11.58	21.1	4.188
15-Oct-17	14:24.0	34.466	19.2	0	0.1199	1.01	4.03	81.4	4.357
17-Oct-17	14:24.0	26.426	34.8	0	0.1199	0	1.01	46.3	4.188
17-Oct-17	14:24.0	25.744	32.2	0	0.1199	0.5	3.52	46.3	4.194
26-Oct-17	14:24.0	40	17.3	0	0.1199	3.02	8.56	47.7	4.363
17-Oct-17	14:24.0	38.616	16.6	0	0.1199	2.01	6.04	16.8	4.333
17-Oct-17	14:24.0	33.391	23.7	0	0.1199	0	4.53	35.1	4.363
21-Oct-17	14:24.0	33.261	43.8	0	0.1199	0.5	4.03	105.3	4.333
13-Oct-17	14:24.0	18.509	91.4	0	0.1199	0	0.5	129.2	4.17
27-Oct-17	14:24.0	34.071	27.7	0	0.1199	0	0	140.4	4.2
27-Oct-17	14:24.0	31.663	39.1	0	0.1199	3.52	8.56	49.1	4.339
15-Oct-17	14:24.0	20.079	43.3	0	0.1199	0	0.5	137.6	4.2
16-Oct-17	14:24.0	20.698	43.9	0	0.1199	0	0	137.6	4.2
16-Oct-17	14:24.0	19.579	48.6	0	0.1199	0	0	137.6	4.2
16-Oct-17	14:24.0	20.603	49.2	0	0.1199	0	0	137.6	4.194
20-Oct-17	14:24.0	33.105	48.6	0	0.1199	1.01	5.03	67.4	4.345
23-Oct-17	14:24.0	31.944	46.6	0	0.1199	0	0	137.6	4.333
21-Oct-17	14:24.0	23.424	84.2	0	0.1199	0	0	112.3	4.176
20-Oct-17	14:24.0	37.343	31.2	0	0.1199	1.51	6.54	33.7	4.369
28-Oct-17	14:24.0	24.122	73.8	0	0.1199	0	0	140.4	4.188
19-Oct-17	14:24.0	27.087	71	0	0.1199	0.5	4.03	108.1	4.393
17-Oct-17	14:24.0	40.314	12.9	0	0.1199	1.51	6.04	49.1	4.375
13-Oct-17	14:24.0	31.331	27.7	0	0.1199	3.02	10.07	136.2	4.315
23-Oct-17	14:24.0	24.098	72.7	0	0.1199	0	0	122.1	4.194
13-Oct-17	14:24.0	30.925	23.3	0	0.1199	3.02	9.56	127.8	4.321
20-Oct-17	14:24.0	29.14	66.6	0	0.1199	0	2.01	103.9	4.321
13-Oct-17	14:24.0	28.568	40.6	0	0.1199	2.01	7.05	134.8	4.339
28-Oct-17	14:24.0	24.726	74.6	0	0.1199	0	6.04	144.6	4.194
13-Oct-17	14:24.0	22.609	79.5	0	0.1199	0	2.01	117.9	4.206
13-Oct-17	14:24.0	20.126	90.2	0	0.1199	0	1.51	115.1	4.176
14-Oct-17	14:24.0	18.509	77.3	0	0.1199	1.51	6.54	133.4	4.194
23-Mar-18	49:17.0	33.887	61	0	0.1204	0	1.01	234.5	4.345
26-Mar-18	49:17.0	28.742	67.7	0	0.1204	0	0	334.1	4.327
23-Mar-18	49:17.0	27.284	78.4	0	0.1204	0	1.51	315.9	4.273
23-Mar-18	49:17.0	30.091	74.4	0	0.1204	0	1.01	203.6	4.327
23-Mar-18	49:17.0	24.823	94.7	0	0.1204	0	0	198	4.237
23-Mar-18	49:17.0	26.256	87.4	0	0.1204	0	1.01	199.4	4.333
23-Mar-18	49:17.0	23.352	85.9	0	0.1204	0	2.52	339.7	4.224
23-Mar-18	49:17.0	22.705	89.5	0	0.1204	0	0.5	329.9	4.206
23-Mar-18	49:17.0	22.968	90.8	0	0.1204	0	0	329.9	4.2
23-Mar-18	49:17.0	22.513	95.9	0	0.1204	0	0	198	4.134
28-Mar-18	49:17.0	24.557	98.7	0	0.1204	0	0	116.5	4.255
23-Mar-18	49:17.0	31.408	68.6	0	0.1204	0	1.01	174.1	4.321
27-Mar-18	49:17.0	24.339	92.9	0	0.1204	0	0	348.2	4.158
26-Mar-18	49:17.0	24.291	92.9	0	0.1204	0	0	348.2	4.164
23-Mar-18	49:17.0	33.131	60	0	0.1204	0	2.01	329.9	4.321
26-Mar-18	49:17.0	24.944	92.1	0	0.1204	0	0	348.2	4.17
26-Mar-18	49:17.0	25.258	90.1	0	0.1204	0	0	348.2	4.176
13-May-17	14:24.0	19.246	89.2	0	0.1204	0	0	164.3	4.206
15-Oct-17	14:24.0	34.545	21.2	0	0.1204	0	4.53	96.9	4.321
15-Oct-17	14:24.0	33.704	20.6	0	0.1204	1.01	4.03	122.1	4.303
21-Oct-17	14:24.0	26.598	55.5	0	0.1204	0	0	126.4	4.188
20-Oct-17	14:24.0	39.177	23.7	0	0.1204	0	0	77.2	4.303
20-Oct-17	14:24.0	38.198	24.7	0	0.1204	1.01	6.54	54.8	4.297
20-Oct-17	14:24.0	34.255	42.3	0	0.1204	2.52	7.05	42.1	4.321
20-Oct-17	14:24.0	23.545	87.3	0	0.1204	0	0	146	4.188
20-Oct-17	14:24.0	21.485	86.5	0	0.1204	0	0	147.4	4.176
20-Oct-17	14:24.0	22.25	84.5	0	0.1204	0	0	147.4	4.182
19-Oct-17	14:24.0	29.439	61.8	0	0.1204	1.01	4.53	82.8	4.333
19-Oct-17	14:24.0	24.098	80.9	0	0.1204	1.01	4.53	117.9	4.363
19-Oct-17	14:24.0	22.513	85.6	0	0.1204	0.5	3.52	123.5	4.218
19-Oct-17	14:24.0	21.795	87	0	0.1204	0.5	4.03	136.2	4.176
20-Oct-17	14:24.0	26.231	77.9	0	0.1204	0	0.5	109.5	4.255
13-Oct-17	14:24.0	26.012	61	0	0.1204	0.5	4.03	112.3	4.237
21-Oct-17	14:24.0	24.798	72	0	0.1204	0	0	139	4.188
17-Oct-17	14:24.0	27.998	18.8	0	0.1204	0	0	54.8	4.2
17-Oct-17	14:24.0	26.818	19.4	0	0.1204	0	0	70.2	4.2
16-Oct-17	14:24.0	26.916	22.5	0	0.1204	0	0	70.2	4.2
16-Oct-17	14:24.0	39.516	11.1	0	0.1204	0	0	84.2	4.321
16-Oct-17	14:24.0	38.868	11.3	0	0.1204	0.5	8.05	68.8	4.291
15-Oct-17	14:24.0	25.21	34.7	0	0.1204	0	0	137.6	4.2
15-Oct-17	14:24.0	22.872	37.3	0	0.1204	0	0	137.6	4.206
7-Oct-17	14:24.0	32.51	42	0	0.1204	2.01	6.04	75.8	4.351
7-Oct-17	14:24.0	27.505	60.3	0	0.1204	0.5	4.03	92.7	4.339
7-Oct-17	14:24.0	24.75	69.9	0	0.1204	0.5	3.52	103.9	4.339
7-Oct-17	14:24.0	22.824	76.6	0	0.1204	0	0	112.3	4.255
13-Oct-17	14:24.0	19.651	89.8	0	0.1204	1.01	4.53	134.8	4.17
14-Oct-17	14:24.0	19.008	73.2	0	0.1204	1.51	6.54	129.2	4.224
18-Oct-17	14:24.0	36.335	22.4	0	0.1204	1.01	6.04	89.9	4.303
15-Oct-17	14:24.0	20.246	67.1	0	0.1204	0	0	124.9	4.2
14-Oct-17	14:24.0	26.94	41.5	0	0.1204	2.01	7.05	133.4	4.339
14-Oct-17	14:24.0	29.34	29.9	0	0.1204	2.52	7.55	123.5	4.309
14-Oct-17	14:24.0	20.079	64.9	0	0.1204	2.52	8.05	132	4.2
19-Oct-17	14:24.0	22.154	83.8	0	0.1204	0	0	150.2	4.2
17-Oct-17	14:24.0	26.769	27.5	0	0.1204	0	3.52	32.3	4.194
18-Oct-17	14:24.0	34.969	36	0	0.1204	2.52	7.55	132	4.339
13-Oct-17	14:24.0	18.652	90.4	0	0.1204	0	0.5	130.6	4.17
18-Oct-17	14:24.0	34.387	24.2	0	0.1204	2.52	7.55	51.9	4.339
18-Oct-17	14:24.0	30.293	30	0	0.1204	3.52	10.57	25.3	4.255
18-Oct-17	14:24.0	29.065	31.8	0	0.1204	2.01	8.56	29.5	4.194
18-Oct-17	14:24.0	29.414	31.8	0	0.1204	0	0	30.9	4.188
17-Oct-17	14:24.0	41.56	11.8	0	0.1204	0	5.54	35.1	4.291
19-Oct-17	14:24.0	21.461	86.9	0	0.1204	0.5	3.02	140.4	4.182
13-Oct-17	14:24.0	21.294	57.1	0	0.1204	2.52	10.07	132	4.2
22-Oct-17	14:24.0	27.677	53.5	0	0.1204	0	0	134.8	4.206
24-Oct-17	14:24.0	23.424	70	0	0.1204	0	0	119.3	4.188
24-Oct-17	14:24.0	24.629	63.2	0	0.1204	0	0	113.7	4.194
23-Oct-17	14:24.0	25.914	55.6	0	0.1204	0	0	139	4.2
23-Oct-17	14:24.0	33.574	41.5	0	0.1204	0	4.03	136.2	4.393
22-Oct-17	14:24.0	29.24	58.3	0	0.1204	1.51	7.05	132	4.339
2-Nov-17	14:24.0	23.136	55.2	1.4	0.1204	3.02	10.07	66	4.285
23-Oct-17	14:24.0	25.016	67.9	0	0.1204	0	0	129.2	4.2
24-Oct-17	14:24.0	37.425	24.8	0	0.1204	1.01	5.03	92.7	4.393
22-Oct-17	14:24.0	26.818	58.6	0	0.1204	0	0	127.8	4.2
23-Oct-17	14:24.0	33.861	39.4	0	0.1204	0.5	6.54	130.6	4.339
21-Oct-17	14:24.0	23.713	78.8	0	0.1204	0	0	140.4	4.176
27-Oct-17	14:24.0	30.824	37.7	0	0.1204	0	0	36.5	4.206
27-Oct-17	14:24.0	40.057	17.6	0	0.1204	0	0	60.4	4.303
22-Oct-17	14:24.0	24.291	78.9	0	0.1204	0	0	129.2	4.2
28-Oct-17	14:24.0	24.581	73.4	0	0.1204	0	0	134.8	4.188
22-Oct-17	14:24.0	29.115	54.4	0	0.1204	0	5.03	127.8	4.363
22-Oct-17	14:24.0	28.468	59	0	0.1204	0.5	8.05	133.4	4.345
22-Oct-17	14:24.0	26.207	70.9	0	0.1204	0	0	127.8	4.363
22-Oct-17	14:24.0	27.554	64.8	0	0.1204	0	5.54	129.2	4.393
22-Oct-17	14:24.0	25.914	64	0	0.1204	0	0	127.8	4.2
25-Oct-17	14:24.0	38.504	24.1	0	0.1204	0	0	56.2	4.363
26-Oct-17	14:24.0	38.532	14.1	0	0.1204	2.01	8.05	54.8	4.297
25-Oct-17	14:24.0	30.697	32.1	0	0.1204	0	0	49.1	4.2
25-Oct-17	14:24.0	26.353	45.7	0	0.1204	0	0	127.8	4.2
21-Oct-17	14:24.0	22.848	83	0	0.1204	0	0	132	4.176
26-Oct-17	14:24.0	40.66	15	0	0.1204	2.52	6.54	60.4	4.309
25-Oct-17	14:24.0	35.235	31.3	0	0.1204	0	0	105.3	4.297
23-Mar-18	49:17.0	26.061	88.5	0.2	0.1209	0	0	331.3	4.303
23-Mar-18	49:17.0	22.561	94.9	0	0.1209	0	0	198	4.14
26-Mar-18	49:17.0	31.179	63.5	0	0.1209	0	0	348.2	4.285
26-Mar-18	49:17.0	28.965	71.8	0	0.1209	0	0	348.2	4.243
23-Mar-18	49:17.0	25.841	92.1	0	0.1209	0	1.01	102.5	4.237
23-Mar-18	49:17.0	26.085	89.5	0.2	0.1209	0	0.5	82.8	4.255
26-Mar-18	49:17.0	27.628	80.1	0	0.1209	0	0	348.2	4.218
23-Mar-18	49:17.0	22.513	95.6	0	0.1209	0	0	198	4.14
23-Mar-18	49:17.0	27.579	85.8	0	0.1209	0	0	321.5	4.291
23-Mar-18	49:17.0	28.568	84.2	0	0.1209	0	0	325.7	4.345
26-Mar-18	49:17.0	26.207	86.9	0	0.1209	0	0	348.2	4.188
26-Mar-18	49:17.0	26.622	85.1	0	0.1209	0	0	348.2	4.206
27-Mar-18	49:17.0	23.28	98.5	0	0.1209	0	0	200.8	4.17
23-Mar-18	49:17.0	23.112	96.3	0	0.1209	0	0	198	4.128
26-Mar-18	49:17.0	31.868	60.1	0	0.1209	0	0	342.6	4.339
26-Mar-18	49:17.0	25.939	87.1	0	0.1209	0	0	348.2	4.2
28-Mar-18	49:17.0	23.761	99.2	0	0.1209	0	0	200.8	4.14
28-Mar-18	49:17.0	23.545	99.2	0	0.1209	0	0	200.8	4.152
28-Mar-18	49:17.0	23.448	99.1	0	0.1209	0	0	200.8	4.152
28-Mar-18	49:17.0	23.424	98.9	0	0.1209	0	0	200.8	4.158
28-Mar-18	49:17.0	23.376	98.9	0	0.1209	0	0	200.8	4.158
28-Mar-18	49:17.0	23.376	98.6	0	0.1209	0	0	200.8	4.17
15-Oct-17	14:24.0	32.613	25.2	0	0.1209	1.01	4.03	108.1	4.309
27-Oct-17	14:24.0	40.314	18.2	0	0.1209	0	0	68.8	4.393
26-Oct-17	14:24.0	40.2	12.6	0	0.1209	2.52	6.04	68.8	4.291
27-Oct-17	14:24.0	31.996	33.7	0	0.1209	0	0	29.5	4.194
26-Oct-17	14:24.0	32.717	29.6	0	0.1209	0	0	29.5	4.2
26-Oct-17	14:24.0	34.019	24.3	0	0.1209	0	0	50.5	4.2
8-Oct-17	14:24.0	33.73	33.4	0	0.1209	3.02	8.05	40.7	4.351
8-Oct-17	14:24.0	28.642	45.2	0	0.1209	1.01	8.05	29.5	4.297
27-Oct-17	14:24.0	35.743	22.4	0	0.1209	0	0	117.9	4.206
26-Oct-17	14:24.0	36.092	21.5	0	0.1209	0.5	5.03	36.5	4.206
13-Oct-17	14:24.0	20.817	87.4	0	0.1209	0	1.51	134.8	4.176
12-Oct-17	14:24.0	21.604	84.4	0	0.1209	0	0	127.8	4.176
26-Oct-17	14:24.0	33.521	26.6	0	0.1209	0	0	33.7	4.2
16-Oct-17	14:24.0	28.245	18.5	0	0.1209	0	0	49.1	4.224
15-Oct-17	14:24.0	25.793	33.3	0	0.1209	0	0	137.6	4.212
15-Oct-17	14:24.0	26.769	31	0	0.1209	0	0	136.2	4.218
22-Oct-17	14:24.0	31.153	51.7	0	0.1209	0.5	8.05	147.4	4.357
22-Oct-17	14:24.0	30.849	49.3	0	0.1209	0	5.54	143.2	4.339
15-Oct-17	14:24.0	28.444	28.6	0	0.1209	0	1.51	126.4	4.231
27-Oct-17	14:24.0	40.257	18.1	0	0.1209	0	0	67.4	4.303
27-Oct-17	14:24.0	25.307	73	0	0.1209	0	5.03	144.6	4.2
26-Oct-17	14:24.0	37.398	19.3	0	0.1209	0	6.54	32.3	4.237
16-Oct-17	14:24.0	38.784	9.3	0	0.1209	1.01	7.05	99.7	4.339
16-Oct-17	14:24.0	39.772	9.3	0	0.1209	1.01	5.03	98.3	4.351
27-Oct-17	14:24.0	27.481	65.2	0	0.1209	0.5	10.07	136.2	4.2
27-Oct-17	14:24.0	29.04	59.6	0	0.1209	1.51	10.57	143.2	4.2
8-Oct-17	14:24.0	22.178	78	0	0.1209	0	2.01	110.9	4.188
27-Oct-17	14:24.0	38.644	19.1	0	0.1209	0	0	87	4.291
15-Oct-17	14:24.0	30.773	28.3	0	0.1209	0.5	4.03	117.9	4.267
24-Oct-17	14:24.0	27.554	40.3	0	0.1209	0	0	130.6	4.2
13-Oct-17	14:24.0	23.569	54.4	0	0.1209	3.02	8.56	126.4	4.206
13-Oct-17	14:24.0	22.298	58.6	0	0.1209	2.01	9.06	127.8	4.206
23-Oct-17	14:24.0	29.665	44.7	0	0.1209	0	0	117.9	4.224
23-Oct-17	14:24.0	28.791	46.9	0	0.1209	0	0	119.3	4.206
23-Oct-17	14:24.0	28.245	49.5	0	0.1209	0	0	123.5	4.206
8-Oct-17	14:24.0	24.171	64	0	0.1209	0	0	99.7	4.182
24-Oct-17	14:24.0	24.75	59.7	0	0.1209	0	0	134.8	4.2
13-Oct-17	14:24.0	30.192	27.1	0	0.1209	2.52	7.55	134.8	4.315
24-Oct-17	14:24.0	36.742	25.7	0	0.1209	0	3.02	109.5	4.321
24-Oct-17	14:24.0	31.077	33	0	0.1209	0	0	113.7	4.206
14-Oct-17	14:24.0	29.414	32.6	0	0.1209	2.01	8.05	133.4	4.363
24-Oct-17	14:24.0	30.217	35.1	0	0.1209	0	0	122.1	4.2
14-Oct-17	14:24.0	22.92	50.9	0	0.1209	0	0	136.2	4.206
14-Oct-17	14:24.0	22.896	54.8	0	0.1209	0	0	136.2	4.206
23-Oct-17	14:24.0	27.505	51.7	0	0.1209	0	0	130.6	4.2
25-Oct-17	14:24.0	32.047	28.9	0	0.1209	0	0	109.5	4.2
23-Oct-17	14:24.0	33.6	37.9	0	0.1209	0	0	124.9	4.303
8-Oct-17	14:24.0	20.436	78.4	0	0.1209	0	2.01	146	4.182
14-Oct-17	14:24.0	21.533	61.2	0	0.1209	0	0	134.8	4.206
22-Oct-17	14:24.0	28.147	52.2	0	0.1209	0	0	134.8	4.206
26-Oct-17	14:24.0	31.357	31.3	0	0.1209	0	0	43.5	4.194
25-Oct-17	14:24.0	32.433	29.9	0	0.1209	0	0	28.1	4.2
13-Oct-17	14:24.0	26.549	42.1	0	0.1209	2.01	8.56	132	4.224
25-Oct-17	14:24.0	32.82	29.3	0	0.1209	0	0	117.9	4.2
13-Oct-17	14:24.0	27.358	37.7	0	0.1209	2.01	6.04	133.4	4.237
25-Oct-17	14:24.0	32.924	27.9	0	0.1209	0	0	102.5	4.206
25-Oct-17	14:24.0	33.027	31.9	0	0.1209	0	0	84.2	4.206
25-Oct-17	14:24.0	34.36	30.7	0	0.1209	0	0	89.9	4.249
8-Oct-17	14:24.0	30.217	42	0	0.1209	4.03	9.06	39.3	4.393
13-Oct-17	14:24.0	31.001	26.7	0	0.1209	3.02	9.56	132	4.315
22-Oct-17	14:24.0	29.14	47.6	0	0.1209	0	0	136.2	4.231
7-Oct-17	14:24.0	20.746	81.9	0	0.1209	0	0	116.5	4.176
19-Oct-17	14:24.0	30.773	54.4	0	0.1209	1.51	5.03	75.8	4.369
18-Oct-17	14:24.0	28.245	33.3	0	0.1209	0	3.52	63.2	4.194
18-Oct-17	14:24.0	30.52	27.7	0	0.1209	0	0	35.1	4.188
18-Oct-17	14:24.0	28.941	32.8	0	0.1209	0	0	26.7	4.188
22-Oct-17	14:24.0	23.737	80.7	0	0.1209	0	0	130.6	4.176
22-Oct-17	14:24.0	23.545	81	0	0.1209	0	0	133.4	4.176
18-Oct-17	14:24.0	32.304	27.2	0	0.1209	3.52	11.07	21.1	4.339
22-Oct-17	14:24.0	23.689	80.3	0	0.1209	0	0	132	4.176
18-Oct-17	14:24.0	34.757	36.8	0	0.1209	2.52	8.56	133.4	4.303
18-Oct-17	14:24.0	34.255	35.1	0	0.1209	2.52	7.55	133.4	4.321
19-Oct-17	14:24.0	21.581	86.4	0	0.1209	0	3.52	147.4	4.188
20-Oct-17	14:24.0	31.484	36.1	0	0.1209	0	0	133.4	4.2
21-Oct-17	14:24.0	28.147	48.2	0	0.1209	0	0	129.2	4.188
18-Oct-17	14:24.0	26.867	62.2	0	0.1209	2.52	7.55	137.6	4.237
21-Oct-17	14:24.0	36.878	33.1	0	0.1209	0	0	105.3	4.363
20-Oct-17	14:24.0	39.658	22.6	0	0.1209	0	1.01	47.7	4.321
19-Oct-17	14:24.0	32.613	48.6	0	0.1209	2.52	6.04	39.3	4.333
18-Oct-17	14:24.0	32.098	44.2	0	0.1209	2.52	7.05	140.4	4.315
18-Oct-17	14:24.0	33.783	40.6	0	0.1209	3.02	9.06	137.6	4.333
20-Oct-17	14:24.0	23.04	80.8	0	0.1209	0	0	147.4	4.188
20-Oct-17	14:24.0	24.677	69	0	0.1209	0	0	147.4	4.2
20-Oct-17	14:24.0	24.074	75.5	0	0.1209	0	0	147.4	4.194
13-Oct-17	14:24.0	20.579	89.4	0	0.1209	0	1.01	136.2	4.17
13-Oct-17	14:24.0	20.65	90.3	0	0.1209	0.5	5.54	139	4.17
18-Oct-17	14:24.0	29.54	31.9	0	0.1209	0	0	39.3	4.2
17-Oct-17	14:24.0	40.429	11.7	0	0.1209	0	5.03	57.6	4.321
21-Oct-17	14:24.0	36.824	33.3	0	0.1209	0	4.53	103.9	4.339
19-Oct-17	14:24.0	21.891	85	0	0.1209	0	2.01	148.8	4.188
17-Oct-17	14:24.0	40.775	12.2	0	0.1209	0.5	5.03	43.5	4.297
18-Oct-17	14:24.0	30.167	28.8	0	0.1209	0	0	59	4.2
19-Oct-17	14:24.0	23.232	78.2	0	0.1209	0	0	141.8	4.2
19-Oct-17	14:24.0	22.537	82.2	0	0.1209	0	0	150.2	4.2
18-Oct-17	14:24.0	23.905	74.7	0	0.1209	1.01	7.05	137.6	4.2
27-Mar-18	49:17.0	23.184	97.3	0.2	0.1214	0	0	200.8	4.206
27-Mar-18	49:17.0	23.954	83.1	0.2	0.1214	0	2.01	137.6	4.267
27-Mar-18	49:17.0	22.92	97.5	0.2	0.1214	0	0	200.8	4.2
27-Mar-18	49:17.0	22.8	98	0	0.1214	0	0	200.8	4.188
27-Mar-18	49:17.0	22.848	98.2	0	0.1214	0	0	200.8	4.182
23-Mar-18	49:17.0	23.809	93	0	0.1214	0	0	198	4.152
23-Mar-18	49:17.0	23.28	94	0	0.1214	0	0	198	4.152
22-Mar-18	49:17.0	24.895	90.5	0	0.1214	0	0	198	4.158
22-Mar-18	49:17.0	24.629	91.2	0	0.1214	0	0	198	4.152
7-Oct-17	14:24.0	22.417	69.5	0	0.1214	0	0	133.4	4.2
19-Oct-17	14:24.0	34.071	43.4	0	0.1214	0.5	5.54	25.3	4.369
12-Oct-17	14:24.0	23.881	77.4	0	0.1214	0	0	126.4	4.206
18-Oct-17	14:24.0	28.891	53.5	0	0.1214	2.52	10.57	146	4.224
13-Oct-17	14:24.0	25.234	46.8	0	0.1214	2.52	9.06	129.2	4.212
18-Oct-17	14:24.0	30.192	49.2	0	0.1214	3.02	8.05	144.6	4.267
8-Oct-17	14:24.0	32.587	36.5	0	0.1214	4.03	8.56	37.9	4.333
23-Oct-17	14:24.0	29.04	46	0	0.1214	0	0	116.5	4.212
19-Oct-17	14:24.0	31.791	48.8	0	0.1214	1.01	5.03	116.5	4.261
19-Oct-17	14:24.0	26.867	60.6	0	0.1214	0	0	136.2	4.2
20-Oct-17	14:24.0	25.38	64.5	0	0.1214	0	0	144.6	4.2
7-Oct-17	14:24.0	19.888	80.3	0	0.1214	0	0	116.5	4.176
7-Oct-17	14:24.0	20.341	77.9	0	0.1214	0	0	126.4	4.182
7-Oct-17	14:24.0	20.77	75.8	0	0.1214	0	0	130.6	4.188
12-Oct-17	14:24.0	22.513	80.6	0	0.1214	0	0	137.6	4.2
7-Oct-17	14:24.0	21.461	72.8	0	0.1214	0	0	129.2	4.188
23-Oct-17	14:24.0	32.613	39	0	0.1214	0	4.53	124.9	4.321
12-Oct-17	14:24.0	25.234	73.9	0	0.1214	0	0	141.8	4.327
6-Oct-17	14:24.0	23.136	74.5	0	0.1214	0	0	92.7	4.176
6-Oct-17	14:24.0	25.307	69.3	0	0.1214	0	0	108.1	4.231
6-Oct-17	14:24.0	27.751	58.7	0	0.1214	0	2.52	98.3	4.321
22-Oct-17	14:24.0	24.002	77.4	0	0.1214	1.01	8.56	133.4	4.194
6-Oct-17	14:24.0	29.565	50.6	0	0.1214	1.01	5.03	66	4.321
18-Oct-17	14:24.0	25.671	66.6	0	0.1214	2.01	7.55	139	4.206
7-Oct-17	14:24.0	30.545	48.1	0	0.1214	1.01	4.03	81.4	4.381
8-Oct-17	14:24.0	26.671	49.5	0	0.1214	0	8.05	50.5	4.224
8-Oct-17	14:24.0	24.484	54.1	0	0.1214	0	0	140.4	4.2
23-Oct-17	14:24.0	31.255	41	0	0.1214	0	0	122.1	4.261
8-Oct-17	14:24.0	23.352	63.3	0	0.1214	0	0	161.5	4.2
8-Oct-17	14:24.0	22.417	70.9	0	0.1214	0	0	137.6	4.2
8-Oct-17	14:24.0	21.987	76.3	0	0.1214	0	0.5	120.7	4.188
13-Oct-17	14:24.0	28.692	31	0	0.1214	2.52	8.05	133.4	4.285
22-Oct-17	14:24.0	25.21	70.3	0	0.1214	2.01	7.55	136.2	4.2
22-Oct-17	14:24.0	28.518	50.4	0	0.1214	0	0	134.8	4.218
16-Oct-17	14:24.0	36.688	10.3	0	0.1214	0.5	4.03	96.9	4.255
20-Oct-17	14:24.0	34.677	31.4	0	0.1214	0	0	96.9	4.206
20-Oct-17	14:24.0	33.94	32.3	0	0.1214	0	3.02	99.7	4.206
20-Oct-17	14:24.0	30.798	37	0	0.1214	0	0	134.8	4.2
21-Oct-17	14:24.0	28.667	43.9	0	0.1214	0	0	109.5	4.224
22-Oct-17	14:24.0	30.268	44.9	0	0.1214	0	6.04	134.8	4.273
24-Oct-17	14:24.0	35.422	31.2	0	0.1214	0	4.53	120.7	4.321
26-Oct-17	14:24.0	34.863	23.9	0	0.1214	1.01	4.53	46.3	4.2
12-Oct-17	14:24.0	23.208	78.6	0	0.1214	0	0	134.8	4.224
26-Oct-17	14:24.0	33.548	25	0	0.1214	0	0	51.9	4.2
22-Oct-17	14:24.0	23.761	79.4	0	0.1214	0	0	126.4	4.182
20-Oct-17	14:24.0	37.288	19.7	0	0.1214	0	3.52	71.6	4.224
17-Oct-17	14:24.0	30.394	26.2	0	0.1214	0	0	47.7	4.2
22-Oct-17	14:24.0	31.23	46.8	0	0.1214	0	0	136.2	4.351
16-Oct-17	14:24.0	32.717	12.5	0	0.1214	0	1.01	122.1	4.218
16-Oct-17	14:24.0	31.484	18.2	0	0.1214	0	0	122.1	4.206
16-Oct-17	14:24.0	30.976	21.2	0	0.1214	0	0	127.8	4.206
16-Oct-17	14:24.0	26.818	26	0	0.1214	0	0	134.8	4.206
27-Oct-17	14:24.0	26.451	69.2	0	0.1214	1.01	8.05	143.2	4.2
17-Oct-17	14:24.0	33.235	18.7	0	0.1214	0	0	75.8	4.212
17-Oct-17	14:24.0	37.178	15.1	0	0.1214	0	3.02	89.9	4.249
22-Oct-17	14:24.0	32.15	44.2	0	0.1214	2.01	7.05	133.4	4.351
11-Oct-17	14:24.0	25.598	67.5	0	0.1214	0	0	129.2	4.188
22-Oct-17	14:24.0	23.689	80	0	0.1214	0	9.56	129.2	4.188
27-Oct-17	14:24.0	37.645	19.3	0	0.1214	0	0	74.4	4.231
14-Oct-17	14:24.0	23.256	49.6	0	0.1214	0	0	133.4	4.218
20-Oct-17	14:24.0	38.644	18.6	0	0.1214	0	0	80	4.327
14-Oct-17	14:24.0	26.353	41.1	0	0.1214	2.01	6.54	134.8	4.291
14-Oct-17	14:24.0	24.026	46.5	0	0.1214	0	2.01	134.8	4.224
24-Oct-17	14:24.0	30.293	34	0	0.1214	0	0	120.7	4.2
14-Oct-17	14:24.0	24.871	45	0	0.1214	1.01	4.53	137.6	4.249
24-Oct-17	14:24.0	32.278	31.6	0	0.1214	0	0	116.5	4.218
24-Oct-17	14:24.0	28.841	39	0	0.1214	0	0	133.4	4.2
21-Oct-17	14:24.0	36.796	28.7	0	0.1214	0	0	112.3	4.297
24-Oct-17	14:24.0	33.809	34.5	0	0.1214	0	3.02	120.7	4.249
20-Oct-17	14:24.0	40.286	21.6	0	0.1214	0	0	46.3	4.393
22-Jun-17	14:24.0	26.598	48.9	0		0	0	139	4.369
1-Jul-17	14:24.0	23.472	57.1	0		0	0	155.8	4.339
27-Mar-18	49:17.0	23.352	95	0.2	0.1219	0	0	200.8	4.261
22-Mar-18	49:17.0	31.612	59.9	0	0.1219	0	1.51	141.8	4.297
27-Mar-18	49:17.0	22.848	96.1	0	0.1219	0	0	200.8	4.224
22-Mar-18	49:17.0	35.395	52.3	0	0.1219	0	2.01	136.2	4.363
27-Mar-18	49:17.0	23.064	96.8	0	0.1219	0	0	200.8	4.218
22-Mar-18	49:17.0	34.124	58.5	0	0.1219	0	1.01	133.4	4.333
22-Mar-18	49:17.0	25.501	89.2	0	0.1219	0	0	199.4	4.17
22-Mar-18	49:17.0	25.21	88.2	0	0.1219	0	0	198	4.17
27-Mar-18	49:17.0	22.226	93	1.2	0.1219	0	0	200.8	4.249
27-Mar-18	49:17.0	23.352	95.5	0	0.1219	0	0	200.8	4.249
2-Jun-17	14:24.0	25.598	64.4	0	0.1219	0	0	157.2	4.333
6-Oct-17	14:24.0	31.077	43.9	0	0.1219	0.5	5.03	60.4	4.315
6-Oct-17	14:24.0	33.809	38.6	0	0.1219	0	0	39.3	4.339
6-Oct-17	14:24.0	33.131	39.8	0	0.1219	0	5.03	85.6	4.363
6-Oct-17	14:24.0	32.846	38.3	0	0.1219	0	2.01	70.2	4.321
19-Oct-17	14:24.0	27.235	59.4	0	0.1219	0	0	137.6	4.2
21-Oct-17	14:24.0	28.866	59.3	0	0.1219	3.52	10.57	134.8	4.2
11-Oct-17	14:24.0	31.433	49.9	0	0.1219	0	3.52	99.7	4.387
1-Oct-17	14:24.0	21.963	72.7	0	0.1219	0	3.52	143.2	4.369
11-Oct-17	14:24.0	26.549	68.8	0	0.1219	0	0	77.2	4.249
19-Oct-17	14:24.0	27.702	58.2	0	0.1219	0	0	137.6	4.206
11-Oct-17	14:24.0	26.329	57.9	0	0.1219	0	0	133.4	4.188
12-Oct-17	14:24.0	23.857	84.9	0	0.1219	0	0	140.4	4.357
1-Oct-17	14:24.0	19.603	79.8	0	0.1219	0	3.52	144.6	4.345
10-Oct-17	14:24.0	37.178	27.4	0	0.1219	0	2.01	44.9	4.357
11-Oct-17	14:24.0	25.355	63	0	0.1219	0	0	140.4	4.188
10-Oct-17	14:24.0	29.715	42.8	0	0.1219	1.01	4.53	19.7	4.315
21-Oct-17	14:24.0	36.633	28.3	0	0.1219	0	4.03	120.7	4.303
20-Oct-17	14:24.0	32.227	34.4	0	0.1219	0	2.01	96.9	4.2
20-Oct-17	14:24.0	33.521	31.8	0	0.1219	0	0	124.9	4.2
21-Oct-17	14:24.0	35.342	31.2	0	0.1219	0	4.03	120.7	4.297
21-Oct-17	14:24.0	27.604	61.9	0	0.1219	1.51	7.05	130.6	4.2
21-Oct-17	14:24.0	34.624	30.7	0	0.1219	0	6.04	129.2	4.249
21-Oct-17	14:24.0	33.6	29	0	0.1219	1.01	5.03	127.8	4.218
21-Oct-17	14:24.0	32.768	36.8	0	0.1219	1.51	8.56	136.2	4.224
30-Sep-17	14:24.0	25.574	53.4	0	0.1219	1.01	4.53	109.5	4.351
19-Oct-17	14:24.0	35.529	39	0	0.1219	1.01	5.54	67.4	4.309
19-Oct-17	14:24.0	29.34	54.6	0	0.1219	0	2.01	133.4	4.212
19-Oct-17	14:24.0	33.339	44.8	0	0.1219	0.5	5.54	122.1	4.333
10-Oct-17	14:24.0	35.985	29.5	0	0.1219	0	6.04	23.9	4.321
6-Oct-17	14:24.0	22.082	74.9	0	0.1219	0	0	106.7	4.182
30-Sep-17	14:24.0	16.749	85.6	0	0.1219	0	0	137.6	4.176
30-Sep-17	14:24.0	20.293	82.1	0	0.1219	0	0	127.8	4.249
30-Sep-17	14:24.0	22.8	67.4	0	0.1219	0.5	5.54	124.9	4.321
21-Oct-17	14:24.0	26.036	66.9	0	0.1219	1.01	8.05	134.8	4.2
19-Oct-17	14:24.0	30.369	52.3	0	0.1219	0.5	3.52	117.9	4.224
19-Oct-17	14:24.0	35.182	37.7	0	0.1219	1.01	5.03	30.9	4.339
8-Oct-17	14:24.0	33.757	25.7	0	0.1219	0.5	4.03	50.5	4.267
12-Oct-17	14:24.0	24.026	76.8	0	0.1219	0	0	132	4.218
9-Oct-17	14:24.0	31.153	38.5	0	0.1219	4.03	10.07	33.7	4.351
18-Oct-17	14:24.0	24.412	73.2	0	0.1219	0.5	7.55	143.2	4.2
9-Oct-17	14:24.0	29.49	42.8	0	0.1219	4.03	9.06	26.7	4.297
9-Oct-17	14:24.0	28.122	46.6	0	0.1219	3.52	7.55	28.1	4.237
5-Oct-17	14:24.0	35.075	31.3	0	0.1219	4.03	8.56	57.6	4.321
12-Oct-17	14:24.0	24.629	79.5	0	0.1219	0	0	144.6	4.339
8-Oct-17	14:24.0	35.208	24.7	0	0.1219	0	0	59	4.303
18-Oct-17	14:24.0	27.677	57.2	0	0.1219	2.52	7.05	143.2	4.212
8-Oct-17	14:24.0	32.175	30.2	0	0.1219	0.5	4.53	56.2	4.224
7-Oct-17	14:24.0	26.524	47.5	0	0.1219	0	0	136.2	4.2
12-Oct-17	14:24.0	25.089	76.1	0	0.1219	0	0	140.4	4.333
12-Oct-17	14:24.0	25.162	75.1	0	0.1219	0	0	147.4	4.339
12-Oct-17	14:24.0	24.605	75.5	0	0.1219	0	0	136.2	4.267
12-Oct-17	14:24.0	24.436	75	0	0.1219	0	0	133.4	4.237
9-Oct-17	14:24.0	27.974	39.4	0	0.1219	2.52	7.05	30.9	4.194
9-Oct-17	14:24.0	26.916	49.3	0	0.1219	3.52	7.55	35.1	4.188
17-Oct-17	14:24.0	32.175	22.4	0	0.1219	0	0	67.4	4.2
12-Oct-17	14:24.0	22.537	89.3	0	0.1219	0	0	143.2	4.249
10-Oct-17	14:24.0	28.27	47.5	0	0.1219	0	0	50.5	4.249
17-Oct-17	14:24.0	39.488	12.8	0	0.1219	0.5	4.53	26.7	4.309
17-Oct-17	14:24.0	32.794	19.5	0	0.1219	0	0	75.8	4.206
9-Oct-17	14:24.0	33.966	34	0	0.1219	3.02	8.05	32.3	4.321
8-Oct-17	14:24.0	36.308	24.6	0	0.1219	0	0	51.9	4.309
10-Oct-17	14:24.0	26.426	51.2	0	0.1219	0.5	5.54	342.6	4.188
17-Oct-17	14:24.0	32.227	21.3	0	0.1219	0	0	75.8	4.2
17-Oct-17	14:24.0	31.561	21	0	0.1219	0	0	75.8	4.206
6-Oct-17	14:24.0	23.93	61.8	0	0.1219	0	0	126.4	4.188
7-Oct-17	14:24.0	33.73	36.4	0	0.1219	2.52	7.05	53.3	4.321
7-Oct-17	14:24.0	32.975	36.1	0	0.1219	1.01	5.54	91.3	4.351
10-Oct-17	14:24.0	26.109	49.3	0	0.1219	0.5	3.02	71.6	4.188
8-Oct-17	14:24.0	35.85	28.7	0	0.1219	2.01	7.55	29.5	4.339
10-Oct-17	14:24.0	26.402	44.3	0	0.1219	0	0	122.1	4.2
22-Mar-18	49:17.0	26.353	87	0	0.1224	0	1.01	247.1	4.188
22-Mar-18	49:17.0	28.866	74.8	0	0.1224	0	1.01	301.8	4.327
22-Mar-18	49:17.0	22.178	96.9	0	0.1224	0	0	182.5	4.152
22-Mar-18	49:17.0	31.408	60.5	0	0.1224	0	1.01	189.5	4.309
22-Mar-18	49:17.0	26.207	86.7	0	0.1224	0	0	199.4	4.182
22-Mar-18	49:17.0	31.663	65.2	0	0.1224	0	1.01	226	4.351
22-Mar-18	49:17.0	29.84	62.8	0	0.1224	0	1.01	198	4.249
22-Mar-18	49:17.0	29.414	68.3	0	0.1224	0	0	198	4.224
22-Mar-18	49:17.0	28.27	74.4	0	0.1224	0	0	198	4.218
22-Mar-18	49:17.0	26.916	83.1	0	0.1224	0	0	199.4	4.188
22-Mar-18	49:17.0	23.16	97	0	0.1224	0	0	182.5	4.146
27-Mar-18	49:17.0	23.136	94.5	0.2	0.1224	0	0	200.8	4.243
22-Mar-18	49:17.0	27.21	82	0	0.1224	0	0	199.4	4.2
8-Oct-17	14:24.0	30.748	32.6	0	0.1224	0	4.03	46.3	4.206
8-Oct-17	14:24.0	31.816	31.2	0	0.1224	0	0	47.7	4.212
12-Oct-17	14:24.0	22.106	88.8	0	0.1224	0	0	143.2	4.2
8-Oct-17	14:24.0	30.621	33	0	0.1224	0	3.02	40.7	4.206
19-Oct-17	14:24.0	28.568	56.5	0	0.1224	0	0	151.6	4.206
12-Oct-17	14:24.0	21.772	88	0	0.1224	0	0	147.4	4.176
5-Oct-17	14:24.0	32.484	41.2	0	0.1224	4.03	10.07	44.9	4.333
10-Oct-17	14:24.0	26.818	49	0	0.1224	1.01	5.03	37.9	4.182
11-Oct-17	14:24.0	28.841	60.6	0	0.1224	0	0	101.1	4.357
6-Oct-17	14:24.0	24.46	57.6	0	0.1224	0	0	139	4.2
9-Oct-17	14:24.0	37.508	24.3	0	0.1224	1.01	6.04	63.2	4.363
9-Oct-17	14:24.0	36.579	24	0	0.1224	0	5.03	54.8	4.339
9-Oct-17	14:24.0	35.823	28	0	0.1224	0	0	43.5	4.303
9-Oct-17	14:24.0	26.524	49.3	0	0.1224	2.52	9.06	32.3	4.182
5-Oct-17	14:24.0	29.966	46.1	0	0.1224	3.52	9.06	37.9	4.363
11-Oct-17	14:24.0	29.29	54.8	0	0.1224	2.01	8.05	132	4.224
4-Oct-17	14:24.0	25.38	69.2	0	0.1224	0	4.53	94.1	4.351
21-Oct-17	14:24.0	31.23	49.6	0	0.1224	2.52	9.56	139	4.206
9-Oct-17	14:24.0	27.112	45.5	0	0.1224	3.02	6.04	32.3	4.188
10-Oct-17	14:24.0	34.281	32.3	0	0.1224	0	5.03	26.7	4.393
5-Oct-17	14:24.0	24.171	72.9	0	0.1224	0	2.52	95.5	4.176
11-Oct-17	14:24.0	32.021	43.3	0	0.1224	2.01	8.05	124.9	4.261
9-Oct-17	14:24.0	35.155	30.7	0	0.1224	0	0	50.5	4.357
2-Oct-17	14:24.0	21.008	75.6	0	0.1224	0	3.02	122.1	4.237
30-Sep-17	14:24.0	17.867	88.3	0	0.1224	0	0	164.3	4.176
30-Sep-17	14:24.0	26.769	47	0	0.1224	1.01	5.54	139	4.339
30-Sep-17	14:24.0	29.49	39	0	0.1224	0	0	127.8	4.345
30-Sep-17	14:24.0	30.52	37.5	0	0.1224	0	0	115.1	4.345
4-Oct-17	14:24.0	22.417	82.6	0	0.1224	0	0	113.7	4.249
2-Oct-17	14:24.0	31.331	41.4	0	0.1224	0	0	84.2	4.369
4-Oct-17	14:24.0	29.941	49.7	0	0.1224	0	0.5	50.5	4.345
7-Oct-17	14:24.0	33.548	33.8	0	0.1224	0.5	5.03	67.4	4.339
30-Sep-17	14:24.0	18.033	83.1	0	0.1224	0	4.03	143.2	4.176
2-Oct-17	14:24.0	23.521	68.7	0	0.1224	0	3.02	112.3	4.351
30-Sep-17	14:24.0	30.9	37.2	0	0.1224	0	3.02	130.6	4.393
6-Oct-17	14:24.0	32.278	38.7	0	0.1224	0	3.52	70.2	4.303
6-Oct-17	14:24.0	24.75	64.3	0	0.1224	0	0	124.9	4.2
1-Oct-17	14:24.0	18.129	83.1	0	0.1224	0	3.52	136.2	4.188
7-Oct-17	14:24.0	23.136	68.1	0	0.1224	0	0	132	4.2
1-Oct-17	14:24.0	18.366	85.9	0	0.1224	0	4.03	137.6	4.176
1-Oct-17	14:24.0	18.937	83.3	0	0.1224	0.5	4.03	139	4.2
12-Oct-17	14:24.0	22.202	87.7	0	0.1224	0	0	148.8	4.2
12-Oct-17	14:24.0	22.106	87.7	0	0.1224	0	0	144.6	4.2
2-Oct-17	14:24.0	26.061	59.3	0	0.1224	0	1.51	110.9	4.363
7-Oct-17	14:24.0	28.196	44.6	0	0.1224	0	0	119.3	4.212
4-Oct-17	14:24.0	19.484	89.1	0	0.1224	0	0	140.4	4.188
8-Oct-17	14:24.0	36.606	25.6	0	0.1224	0	0	44.9	4.327
8-Oct-17	14:24.0	36.227	25.8	0	0.1224	0.5	7.05	36.5	4.393
3-Oct-17	14:24.0	31.944	41.8	0	0.1224	0	0	96.9	4.393
3-Oct-17	14:24.0	27.727	56.8	0	0.1224	0	2.01	98.3	4.333
3-Oct-17	14:24.0	24.557	67.7	0	0.1224	0	0	113.7	4.333
7-Oct-17	14:24.0	25.939	50.2	0	0.1224	0	0	134.8	4.206
7-Oct-17	14:24.0	26.695	48.4	0	0.1224	0	0	134.8	4.206
30-Sep-17	14:24.0	18.628	80.1	0	0.1224	0	4.53	141.8	4.182
10-Oct-17	14:24.0	26.793	46.6	0	0.1224	0	2.01	96.9	4.188
6-Oct-17	14:24.0	21.676	69	0	0.1224	0	0	144.6	4.188
26-May-17	14:24.0	30.016	47.2	0		0	0	49.1	4.321
22-Mar-18	49:17.0	30.469	66.2	0	0.1229	0	0	198	4.255
22-Mar-18	49:17.0	22.657	96.3	0	0.1229	0	0	182.5	4.152
22-Mar-18	49:17.0	22.25	96.8	0	0.1229	0	0	182.5	4.152
29-Jun-17	14:24.0	22.992	72.6	0	0.1229	0	0	66	4.363
25-Sep-17	14:24.0	23.04	69.8	0	0.1229	0	0	132	4.321
7-Oct-17	14:24.0	33.652	34.7	0	0.1229	0	2.52	108.1	4.333
7-Oct-17	14:24.0	31.944	38.4	0	0.1229	0	3.02	99.7	4.267
10-Oct-17	14:24.0	38.004	25.7	0	0.1229	1.01	5.03	64.6	4.297
3-Sep-17	14:24.0	20.126	77.6	0	0.1229	1.51	7.05	129.2	4.345
10-Oct-17	14:24.0	37.535	25.1	0	0.1229	1.51	6.54	59	4.351
6-Oct-17	14:24.0	31.128	42.8	1.8	0.1229	0	4.03	59	4.339
25-Sep-17	14:24.0	20.031	82.1	0	0.1229	0	0	155.8	4.224
6-Oct-17	14:24.0	25.89	61.5	0	0.1229	0	0	122.1	4.206
25-Sep-17	14:24.0	24.75	57.5	0	0.1229	0	3.52	133.4	4.351
11-Oct-17	14:24.0	28.345	44.6	0	0.1229	0	0	88.4	4.194
11-Oct-17	14:24.0	27.259	53	0	0.1229	0	0	108.1	4.194
5-Sep-17	14:24.0	12.896	92	0	0.1229	0	0	134.8	4.176
26-Sep-17	14:24.0	20.031	71.8	0	0.1229	0	1.01	129.2	4.176
7-Oct-17	14:24.0	30.192	42.5	0	0.1229	0.5	4.03	113.7	4.291
10-Oct-17	14:24.0	28.394	34.9	0	0.1229	0	0	102.5	4.2
7-Oct-17	14:24.0	29.165	44.6	0	0.1229	0	2.01	94.1	4.218
9-Oct-17	14:24.0	28.518	39.7	0	0.1229	0	0	23.9	4.2
8-Oct-17	14:24.0	29.115	39	0	0.1229	0	7.05	37.9	4.2
8-Oct-17	14:24.0	30.117	35.6	0	0.1229	0	6.04	36.5	4.206
9-Oct-17	14:24.0	36.688	24.7	0	0.1229	1.51	5.54	61.8	4.345
10-Oct-17	14:24.0	31.433	37.8	0	0.1229	0	4.53	18.3	4.321
9-Oct-17	14:24.0	29.565	32.7	0	0.1229	0	0	37.9	4.2
26-Sep-17	14:24.0	25.671	55.4	0	0.1229	0	1.01	129.2	4.206
10-Oct-17	14:24.0	27.21	39.8	0	0.1229	0	0	108.1	4.2
9-Oct-17	14:24.0	28.196	39.5	0	0.1229	1.01	6.04	32.3	4.2
7-Oct-17	14:24.0	34.651	33.2	0	0.1229	0	3.02	87	4.321
6-Oct-17	14:24.0	28.518	45.2	0	0.1229	0	1.01	137.6	4.212
6-Oct-17	14:24.0	28.122	49.5	0	0.1229	0	0	126.4	4.206
9-Oct-17	14:24.0	29.015	38.8	0	0.1229	0	0	28.1	4.2
9-Oct-17	14:24.0	30.243	27.9	0	0.1229	0	2.52	53.3	4.206
4-Oct-17	14:24.0	20.269	84.6	0	0.1229	0	2.52	126.4	4.194
3-Oct-17	14:24.0	19.127	80.3	0	0.1229	0	0	112.3	4.182
3-Oct-17	14:24.0	19.674	82.6	0	0.1229	0	0	82.8	4.176
11-Oct-17	14:24.0	35.609	32.6	0	0.1229	1.51	5.03	51.9	4.4
3-Oct-17	14:24.0	21.939	77.3	0	0.1229	0	0	110.9	4.237
3-Oct-17	14:24.0	30.596	46.2	0	0.1229	0	4.03	92.7	4.393
3-Oct-17	14:24.0	31.816	42.5	0	0.1229	0	2.52	82.8	4.333
12-Oct-17	14:24.0	21.843	87.3	0	0.1229	0	0	139	4.182
30-Aug-17	14:24.0	17.011	80.7	0	0.1229	0	0	133.4	4.206
4-Oct-17	14:24.0	21.557	80.2	0	0.1229	0	0	134.8	4.2
5-Oct-17	14:24.0	28.617	51.8	0	0.1229	3.02	10.07	37.9	4.267
27-Sep-17	14:24.0	26.695	43.1	0	0.1229	0.5	6.54	42.1	4.188
2-Oct-17	14:24.0	30.545	45.8	0	0.1229	0	0	91.3	4.339
4-Oct-17	14:24.0	20.031	86.1	0	0.1229	0	2.52	134.8	4.188
11-Oct-17	14:24.0	33.105	39.7	0	0.1229	1.01	6.04	51.9	4.333
4-Oct-17	14:24.0	19.056	87.6	0	0.1229	0	1.51	140.4	4.188
4-Oct-17	14:24.0	27.924	56.7	0	0.1229	1.51	6.54	56.2	4.369
26-Sep-17	14:24.0	35.288	28.8	0	0.1229	0	0	11.2	4.351
5-Oct-17	14:24.0	22.25	79	0	0.1229	0	0	134.8	4.2
5-Oct-17	14:24.0	20.674	82.2	0	0.1229	0	0	139	4.194
5-Oct-17	14:24.0	20.817	84.6	0	0.1229	0	0	144.6	4.188
5-Oct-17	14:24.0	20.388	85.1	0	0.1229	0	0	144.6	4.182
4-Oct-17	14:24.0	20.793	82.9	0	0.1229	0	1.51	127.8	4.2
29-Sep-17	14:24.0	22.92	73.8	0	0.1229	0	0	127.8	4.309
30-Sep-17	14:24.0	25.72	50.6	0	0.1229	0	5.03	132	4.206
12-Oct-17	14:24.0	22.011	86	0	0.1229	0	0	140.4	4.188
12-Oct-17	14:24.0	22.154	84.9	0	0.1229	0	0	146	4.188
30-Sep-17	14:24.0	18.961	80.3	0	0.1229	1.01	5.54	139	4.188
30-Sep-17	14:24.0	19.746	77.6	0	0.1229	1.51	6.54	130.6	4.194
1-Oct-17	14:24.0	19.77	74.5	0	0.1229	0	5.03	133.4	4.2
1-Oct-17	14:24.0	18.794	79.3	0	0.1229	1.01	5.03	136.2	4.188
1-Oct-17	14:24.0	18.319	84.9	0	0.1229	0	5.03	134.8	4.176
1-Oct-17	14:24.0	25.817	59.8	0	0.1229	0.5	4.53	134.8	4.339
11-Oct-17	14:24.0	37.233	28.9	0	0.1229	1.01	4.53	113.7	4.315
29-Sep-17	14:24.0	25.016	66.4		0.1229	0	1.51	126.4	4.339
11-Oct-17	14:24.0	33.966	39.6	0	0.1229	2.01	7.55	129.2	4.315
1-Oct-17	14:24.0	27.235	51.9	0	0.1229	0	0	109.5	4.363
1-Oct-17	14:24.0	29.04	47.5	0	0.1229	0	4.53	148.8	4.333
1-Oct-17	14:24.0	29.865	42.9	0	0.1229	1.01	5.54	136.2	4.339
26-Sep-17	14:24.0	28.518	42.4	0	0.1229	0	2.52	51.9	4.285
2-Oct-17	14:24.0	18.985	76.2	0	0.1229	0	1.01	117.9	4.188
2-Oct-17	14:24.0	18.081	79.5	0	0.1229	0	1.51	129.2	4.176
2-Oct-17	14:24.0	19.199	80.5	0	0.1229	0	1.51	119.3	4.176
2-Oct-17	14:24.0	28.866	51.4	0	0.1229	0	0	92.7	4.345
28-Sep-17	14:24.0	24.968	75.3	0	0.1229	0	3.02	132	4.351
30-Aug-17	14:24.0	22.729	46.9	0	0.1229	0	2.01	117.9	4.279
29-Sep-17	14:24.0	25.695	61.2	0	0.1229	0	7.55	132	4.333
6-Oct-17	14:24.0	23.93	54.3	0	0.1229	0	0	139	4.2
26-Sep-17	14:24.0	31.842	37.6	0	0.1229	0	3.52	4.2	4.345
5-Oct-17	14:24.0	36.039	28.4	0	0.1229	2.52	8.56	39.3	4.381
5-Oct-17	14:24.0	35.716	25.6	0	0.1229	2.01	6.04	61.8	4.351
6-Oct-17	14:24.0	25.866	53	0	0.1229	0	0	139	4.2
21-Mar-18	49:17.0	23.569	94.8	0	0.1237	0	0	182.5	4.17
22-Mar-18	49:17.0	23.112	95.5	0	0.1237	0	0	182.5	4.164
22-Mar-18	49:17.0	22.872	95.8	0	0.1237	0	0	182.5	4.158
28-Sep-17	14:24.0	23.713	81.3	0	0.1237	0	4.03	134.8	4.273
25-Sep-17	14:24.0	16.463	84.6	0	0.1237	0	0	169.9	4.182
28-Sep-17	14:24.0	27.235	65.8	0	0.1237	0.5	5.03	129.2	4.345
28-Sep-17	14:24.0	28.642	59.5	0	0.1237	1.01	6.54	150.2	4.321
1-Sep-17	14:24.0	26.304	44.2	0	0.1237	1.01	3.52	30.9	4.381
28-Sep-17	14:24.0	22.298	85.7	0	0.1237	0	4.03	140.4	4.188
2-Oct-17	14:24.0	19.627	73.7	0	0.1237	0	0	109.5	4.188
2-Oct-17	14:24.0	32.898	38.8	0	0.1237	1.51	6.04	102.5	4.363
2-Oct-17	14:24.0	20.412	70	0	0.1237	0	0	110.9	4.194
25-Sep-17	14:24.0	16.63	87.2	0	0.1237	0	0	169.9	4.176
1-Sep-17	14:24.0	22.92	57.9	0	0.1237	1.01	4.03	44.9	4.339
2-Oct-17	14:24.0	33.053	38.2	0	0.1237	0	4.53	94.1	4.321
5-Sep-17	14:24.0	22.609	58.4	0	0.1237	0	3.52	120.7	4.393
5-Oct-17	14:24.0	26.744	58.7	0	0.1237	1.51	7.05	37.9	4.218
5-Sep-17	14:24.0	16.892	92.4	0	0.1237	0	1.51	130.6	4.231
31-Aug-17	14:24.0	16.392	90.9	0	0.1237	0	1.01	105.3	4.224
5-Sep-17	14:24.0	12.147	90.9	0	0.1237	0	0	134.8	4.182
5-Sep-17	14:24.0	16.773	84	0	0.1237	1.01	4.53	137.6	4.2
5-Oct-17	14:24.0	34.097	36.8	0	0.1237	4.53	9.56	46.3	4.375
11-Oct-17	14:24.0	36.715	30.2	0	0.1237	1.51	6.04	123.5	4.309
3-Oct-17	14:24.0	19.698	73.9	0	0.1237	0	0	117.9	4.188
11-Oct-17	14:24.0	37.151	29.1	0	0.1237	1.01	4.53	103.9	4.291
2-Oct-17	14:24.0	32.717	39	0	0.1237	1.51	5.54	108.1	4.393
31-Aug-17	14:24.0	22.8	48.4	0	0.1237	0.5	5.54	151.6	4.333
26-Sep-17	14:24.0	16.915	79.9	0	0.1237	0	0	129.2	4.182
26-Sep-17	14:24.0	17.724	78.4	0	0.1237	0	0	129.2	4.188
12-Oct-17	14:24.0	22.513	82.5	0	0.1237	0	0	139	4.194
12-Oct-17	14:24.0	22.633	82.2	0	0.1237	0	0	137.6	4.2
6-Oct-17	14:24.0	29.59	48.2	0	0.1237	0.5	6.04	126.4	4.309
30-Sep-17	14:24.0	31.868	35.3	0	0.1237	0	6.54	127.8	4.351
26-Sep-17	14:24.0	19.389	73.4	0	0.1237	0	0	129.2	4.194
6-Oct-17	14:24.0	28.27	58.1	0	0.1237	0	0.5	147.4	4.249
29-Sep-17	14:24.0	21.437	69.2	0	0.1237	0	0	126.4	4.2
6-Oct-17	14:24.0	29.54	44.6	0	0.1237	0	2.52	139	4.224
12-Oct-17	14:24.0	23.064	80.3	0	0.1237	0	8.05	137.6	4.2
6-Oct-17	14:24.0	30.369	33.2	0	0.1237	0	3.52	132	4.206
26-Sep-17	14:24.0	33.183	33.3	0	0.1237	0	1.51	19.7	4.315
31-Aug-17	14:24.0	20.317	74.3	0	0.1237	0	2.52	132	4.345
29-Sep-17	14:24.0	29.815	47.7	0	0.1237	0.5	5.03	126.4	4.393
29-Sep-17	14:24.0	26.378	58.7	0	0.1237	0	0	133.4	4.333
25-Sep-17	14:24.0	31.255	39.8	0	0.1237	0.5	3.52	110.9	4.333
25-Sep-17	14:24.0	27.875	48.6	0	0.1237	0	4.03	108.1	4.327
29-Sep-17	14:24.0	21.724	77.8	0	0.1237	0	0	127.8	4.237
29-Sep-17	14:24.0	21.151	80.7	0	0.1237	0	0	129.2	4.182
29-Sep-17	14:24.0	20.96	81.5	0	0.1237	0	0	132	4.176
3-Oct-17	14:24.0	20.746	66.8	0	0.1237	0	0	116.5	4.188
1-Oct-17	14:24.0	30.495	43.4	0	0.1237	0.5	4.53	122.1	4.375
11-Oct-17	14:24.0	38.17	26	0	0.1237	1.01	4.53	109.5	4.363
29-Sep-17	14:24.0	22.776	62.7	0	0.1237	0	4.53	126.4	4.212
3-Sep-17	14:24.0	17.32	86.8	0	0.1237	0	3.02	144.6	4.176
27-Sep-17	14:24.0	26.671	45.6	0	0.1237	0	0	35.1	4.182
11-Oct-17	14:24.0	29.29	38.9	0	0.1237	0	0	190.9	4.2
9-Oct-17	14:24.0	33.079	28.4	0	0.1237	0	2.01	67.4	4.224
5-Sep-17	14:24.0	15.485	87.4	0	0.1237	0	3.02	134.8	4.194
9-Oct-17	14:24.0	36.281	25.1	0	0.1237	1.01	5.03	43.5	4.351
5-Oct-17	14:24.0	28.345	39.7	0	0.1237	0	1.01	110.9	4.206
5-Oct-17	14:24.0	28.965	38.2	0	0.1237	0	1.01	113.7	4.224
26-Sep-17	14:24.0	37.124	21	0	0.1237	0.5	6.54	49.1	4.333
3-Sep-17	14:24.0	24.388	58.5	0	0.1237	1.01	5.54	133.4	4.345
3-Sep-17	14:24.0	21.39	70.5	0	0.1237	1.51	6.04	132	4.369
3-Sep-17	14:24.0	20.936	71.5	0	0.1237	0	6.04	123.5	4.351
27-Sep-17	14:24.0	28.097	43.6	0	0.1237	1.01	8.56	35.1	4.218
3-Sep-17	14:24.0	18.224	87	0	0.1237	1.01	5.03	147.4	4.249
27-Sep-17	14:24.0	26.72	43.6	0	0.1237	0	0	39.3	4.188
4-Oct-17	14:24.0	31.765	41.9	0	0.1237	0	8.56	47.7	4.321
4-Oct-17	14:24.0	33.652	35.5	0	0.1237	3.02	7.55	46.3	4.351
5-Oct-17	14:24.0	31.612	33.3	0	0.1237	0.5	3.02	102.5	4.224
5-Oct-17	14:24.0	24.605	71	0	0.1237	0	0	116.5	4.2
5-Oct-17	14:24.0	23.208	75.6	0	0.1237	0	0	120.7	4.2
5-Oct-17	14:24.0	33.443	29.1	0	0.1237	1.01	5.54	80	4.255
10-Oct-17	14:24.0	37.343	24.6	0	0.1237	1.01	5.03	53.3	4.315
10-Oct-17	14:24.0	37.096	23.6	0	0.1237	0.5	3.52	61.8	4.333
5-Oct-17	14:24.0	35.262	27.3	0	0.1237	1.51	4.53	74.4	4.351
5-Oct-17	14:24.0	36.688	25.6	0	0.1237	2.52	6.04	51.9	4.315
23-Sep-17	14:24.0	20.627	89.5	0	0.1237	0	0	137.6	4.218
5-Oct-17	14:24.0	29.29	38.4	0	0.1237	0	0	133.4	4.212
5-Oct-17	14:24.0	27.924	39.7	0	0.1237	0	1.51	119.3	4.206
9-Oct-17	14:24.0	34.942	26.2	0	0.1237	0	3.52	51.9	4.255
9-Oct-17	14:24.0	31.842	27.8	0	0.1237	0	0.5	89.9	4.212
30-Aug-17	14:24.0	10.051	85.5	0	0.1237	0	0	133.4	4.182
3-Oct-17	14:24.0	33.235	37.8	0	0.1237	1.01	7.05	124.9	4.321
24-Sep-17	14:24.0	19.555	79.9	0	0.1237	1.01	4.53	146	4.261
24-Sep-17	14:24.0	21.652	70.1	0	0.1237	1.51	5.03	136.2	4.339
30-Aug-17	14:24.0	23.713	40.6	0	0.1237	0.5	3.02	85.6	4.339
10-Oct-17	14:24.0	29.24	36.9	0	0.1237	0	0	339.7	4.2
4-Oct-17	14:24.0	22.729	74.8	0	0.1237	0	0	126.4	4.2
11-Oct-17	14:24.0	29.715	37	0	0.1237	0	0	303.2	4.2
5-Oct-17	14:24.0	27.038	50.3	0	0.1237	0	2.52	126.4	4.2
27-Sep-17	14:24.0	31.561	37	0	0.1237	4.03	9.56	33.7	4.363
9-Oct-17	14:24.0	30.142	29.9	0	0.1237	0	0	35.1	4.2
9-Oct-17	14:24.0	31.612	27.1	0	0.1237	0	3.02	89.9	4.206
30-Aug-17	14:24.0	9.805	87.4	0	0.1237	0	0	133.4	4.176
21-Mar-18	49:17.0	31.637	65.9	0	0.1242	0	1.01	134.8	4.333
21-Mar-18	49:17.0	25.671	84	0	0.1242	0	0.5	178.3	4.321
21-Mar-18	49:17.0	24.629	92	0	0.1242	0	0	182.5	4.188
21-Mar-18	49:17.0	33.313	56.5	0	0.1242	0	1.51	144.6	4.339
21-Mar-18	49:17.0	24.074	93.6	0	0.1242	0	0	182.5	4.176
21-Mar-18	49:17.0	28.171	76.4	0	0.1242	0	1.01	306.1	4.339
21-Mar-18	49:17.0	33.94	58.4	0	0.1242	0	2.01	136.2	4.363
21-Mar-18	49:17.0	35.529	50.7	0	0.1242	0	0.5	105.3	4.363
3-Oct-17	14:24.0	33.626	38.5	0	0.1242	0	6.54	105.3	4.339
4-Oct-17	14:24.0	33.443	32.7	0	0.1242	1.01	6.54	42.1	4.315
4-Oct-17	14:24.0	26.158	47.2	0	0.1242	0	0	103.9	4.206
3-Oct-17	14:24.0	21.652	67.2	0	0.1242	0	0	110.9	4.2
3-Oct-17	14:24.0	24.46	67.1	0	0.1242	0	0	124.9	4.206
3-Oct-17	14:24.0	32.82	39	0	0.1242	1.01	5.54	110.9	4.381
30-Sep-17	14:24.0	22.872	63.3	0	0.1242	1.01	7.05	130.6	4.206
4-Oct-17	14:24.0	25.793	63.6	0	0.1242	0	0	119.3	4.2
10-Sep-17	14:24.0	19.603	88.5	0	0.1242	0	2.52	133.4	4.206
2-Oct-17	14:24.0	21.437	66.4	0	0.1242	0	0	103.9	4.2
2-Oct-17	14:24.0	21.867	63.8	0	0.1242	0	0	120.7	4.2
1-Oct-17	14:24.0	29.941	42.8	0	0.1242	1.01	5.54	115.1	4.321
10-Sep-17	14:24.0	24.702	69.6	0	0.1242	0.5	3.02	119.3	4.381
13-Sep-17	14:24.0	24.46	49.5	0	0.1242	0	0	73	4.327
11-Oct-17	14:24.0	23.978	76.5	0	0.1242	2.01	7.55	150.2	4.2
1-Oct-17	14:24.0	21.604	69.1	0	0.1242	0.5	6.04	133.4	4.2
3-Oct-17	14:24.0	25.866	59.1	0	0.1242	0	0	124.9	4.206
15-Sep-17	14:24.0	25.914	48.1	0	0.1242	0	0	126.4	4.345
3-Oct-17	14:24.0	30.469	44.1	0	0.1242	0	0	113.7	4.273
3-Oct-17	14:24.0	31.663	40.5	0	0.1242	0	4.03	112.3	4.321
10-Sep-17	14:24.0	18.889	89.9	0	0.1242	0	1.51	120.7	4.188
1-Oct-17	14:24.0	20.698	70.7	0	0.1242	0	0	130.6	4.2
10-Sep-17	14:24.0	21.127	82	0	0.1242	0.5	3.02	133.4	4.363
31-Aug-17	14:24.0	11.443	86.3	0	0.1242	0	0	120.7	4.2
2-Sep-17	14:24.0	19.793	84.3	0	0.1242	1.01	5.03	143.2	4.261
2-Sep-17	14:24.0	23.064	72.3	0	0.1242	0.5	5.03	124.9	4.357
23-Sep-17	14:24.0	28.394	52.2	0	0.1242	0	3.02	112.3	4.387
2-Sep-17	14:24.0	23.857	64.9	0	0.1242	1.01	6.54	146	4.363
23-Sep-17	14:24.0	24.871	68.6	0	0.1242	0	1.01	335.5	4.285
23-Sep-17	14:24.0	16.487	90.6	0	0.1242	0	0	137.6	4.182
23-Sep-17	14:24.0	15.867	89.3	0	0.1242	0	0	137.6	4.218
10-Oct-17	14:24.0	32.433	29	0	0.1242	0	1.01	70.2	4.224
27-Sep-17	14:24.0	24.992	47	0	0.1242	0.5	4.53	61.8	4.194
22-Sep-17	14:24.0	26.524	59.2	0	0.1242	0	3.52	134.8	4.351
2-Sep-17	14:24.0	17.819	89.6	0	0.1242	0.5	4.03	136.2	4.188
22-Sep-17	14:24.0	23.785	72.5	0	0.1242	0	0	126.4	4.297
22-Sep-17	14:24.0	20.365	91.8	0	0.1242	0	0	151.6	4.224
3-Sep-17	14:24.0	18.247	83.9	0	0.1242	0.5	4.53	126.4	4.194
3-Sep-17	14:24.0	17.724	85	0	0.1242	0.5	4.03	132	4.188
3-Sep-17	14:24.0	17.51	84.9	0	0.1242	0.5	3.02	134.8	4.182
3-Sep-17	14:24.0	16.415	85.1	0	0.1242	0	2.52	143.2	4.182
31-Aug-17	14:24.0	14.577	77.8	0	0.1242	0	0.5	120.7	4.2
26-Sep-17	14:24.0	38.449	15.9	0	0.1242	1.01	5.54	73	4.333
28-Sep-17	14:24.0	23.569	72.8	0	0.1242	1.01	10.57	129.2	4.206
10-Oct-17	14:24.0	35.342	25.6	0	0.1242	0	2.52	81.4	4.249
24-Sep-17	14:24.0	23.93	57.5	0	0.1242	1.01	6.54	130.6	4.345
26-Sep-17	14:24.0	19.698	67.5	0	0.1242	0	0	129.2	4.2
31-Aug-17	14:24.0	26.036	35.7	0	0.1242	1.01	5.03	134.8	4.339
31-Aug-17	14:24.0	24.847	40.2	0	0.1242	0.5	4.53	151.6	4.381
25-Sep-17	14:24.0	29.715	44.7	0	0.1242	0.5	4.03	127.8	4.4
31-Aug-17	14:24.0	12.074	90.1	0	0.1242	0	0.5	120.7	4.182
1-Sep-17	14:24.0	16.963	92	0	0.1242	0	0	130.6	4.218
1-Sep-17	14:24.0	21.342	70.5	0	0.1242	0	2.52	50.5	4.333
25-Sep-17	14:24.0	16.915	78.8	0	0.1242	0	0	168.5	4.188
25-Sep-17	14:24.0	18.794	74.7	0	0.1242	0	0	134.8	4.188
2-Sep-17	14:24.0	18.937	86.8	0	0.1242	1.01	5.03	143.2	4.255
24-Sep-17	14:24.0	26.378	48.5	0	0.1242	0	5.54	123.5	4.339
2-Sep-17	14:24.0	18.319	89.7	0	0.1242	0.5	4.03	137.6	4.188
24-Sep-17	14:24.0	18.747	83.6	0	0.1242	1.51	5.03	148.8	4.182
24-Sep-17	14:24.0	18.771	85	0	0.1242	1.51	6.04	141.8	4.188
10-Oct-17	14:24.0	31.944	32.7	0	0.1242	0	0	54.8	4.2
10-Oct-17	14:24.0	31.944	32.2	0	0.1242	0	0	64.6	4.206
10-Oct-17	14:24.0	31.842	34.1	0	0.1242	0	0	89.9	4.206
10-Oct-17	14:24.0	32.433	30.2	0	0.1242	0	0	77.2	4.212
23-Sep-17	14:24.0	30.243	44.4	0	0.1242	0.5	3.52	81.4	4.345
2-Sep-17	14:24.0	17.653	89.2	0	0.1242	0	4.03	133.4	4.188
27-Sep-17	14:24.0	29.215	41.5	0	0.1242	4.03	9.56	37.9	4.297
24-Sep-17	14:24.0	28.072	41.3	0	0.1242	0	0	123.5	4.363
29-Sep-17	14:24.0	29.24	47.4	0	0.1242	0	6.04	133.4	4.363
29-Aug-17	14:24.0	13.209	88.6	0	0.1242	0	0	115.1	4.182
11-Oct-17	14:24.0	25.695	69.1	0	0.1242	3.02	8.05	146	4.212
29-Aug-17	14:24.0	14.17	86.1	0	0.1242	0	0	153	4.188
11-Oct-17	14:24.0	24.629	73.9	0	0.1242	2.52	8.05	144.6	4.206
28-Sep-17	14:24.0	25.72	62.9	0	0.1242	0.5	10.57	126.4	4.218
11-Oct-17	14:24.0	23.737	78	0	0.1242	0	8.56	141.8	4.2
11-Oct-17	14:24.0	23.472	78.8	0	0.1242	0	7.05	136.2	4.2
29-Sep-17	14:24.0	21.724	79.9	0	0.1242	0	8.05	139	4.2
12-Oct-17	14:24.0	22.848	81.3	0	0.1242	0	0	139	4.2
27-Sep-17	14:24.0	25.525	44.9	0	0.1242	0	0	56.2	4.2
29-Sep-17	14:24.0	20.817	82.6	0	0.1242	0	0	134.8	4.176
5-Sep-17	14:24.0	26.012	43.8	0	0.1242	0.5	6.04	124.9	4.327
29-Sep-17	14:24.0	28.692	48.9	0	0.1242	0	5.54	137.6	4.351
29-Sep-17	14:24.0	27.333	49.6	0	0.1242	0	6.54	119.3	4.333
29-Sep-17	14:24.0	26.378	52.4	0	0.1242	0	0	126.4	4.279
29-Sep-17	14:24.0	25.428	52.5	0	0.1242	0	0	117.9	4.237
29-Sep-17	14:24.0	24.702	53.7	0	0.1242	0	0	126.4	4.224
29-Sep-17	14:24.0	23.713	57.4	0	0.1242	0	0	119.3	4.218
29-Sep-17	14:24.0	21.939	66.1	0	0.1242	0	6.54	129.2	4.206
30-Sep-17	14:24.0	20.531	73.6	0	0.1242	0	5.54	132	4.2
30-Sep-17	14:24.0	31.459	35.1	0	0.1242	1.51	6.04	127.8	4.333
29-Sep-17	14:24.0	21.056	82	0	0.1242	0	0	130.6	4.182
30-Aug-17	14:24.0	11.394	78.4	0	0.1242	0	0	133.4	4.2
30-Aug-17	14:24.0	27.087	32.5	0	0.1242	0.5	5.03	126.4	4.357
30-Aug-17	14:24.0	26.109	35.9	0	0.1242	1.01	5.03	132	4.321
4-Sep-17	14:24.0	15.533	75.5	0	0.1242	0	5.03	134.8	4.188
4-Sep-17	14:24.0	14.84	83.5	0	0.1242	0	2.52	147.4	4.182
4-Sep-17	14:24.0	15.151	86.7	0	0.1242	0	3.02	134.8	4.176
4-Sep-17	14:24.0	15.772	85.7	0	0.1242	0.5	3.52	139	4.2
4-Sep-17	14:24.0	17.51	80.5	0	0.1242	1.01	3.52	146	4.297
4-Sep-17	14:24.0	21.867	61.8	0	0.1242	0.5	6.54	139	4.351
4-Sep-17	14:24.0	23.617	54	0	0.1242	1.01	6.04	123.5	4.339
29-Aug-17	14:24.0	16.915	86.3	0	0.1242	0	0	115.1	4.255
30-Aug-17	14:24.0	11.078	82.7	0	0.1242	0	0	133.4	4.188
29-Aug-17	14:24.0	17.439	77.2	0	0.1242	0	0	116.5	4.351
27-Sep-17	14:24.0	34.942	28.1	0	0.1242	3.02	9.06	43.5	4.4
27-Sep-17	14:24.0	36.498	23.6	0	0.1242	2.52	6.54	53.3	4.321
28-Sep-17	14:24.0	22.441	84.2	0	0.1242	0	4.03	141.8	4.188
5-Sep-17	14:24.0	17.915	81.8	0	0.1242	0.5	3.52	139	4.2
5-Sep-17	14:24.0	14.457	90	0	0.1242	0	0	134.8	4.188
28-Sep-17	14:24.0	22.106	86.5	0	0.1242	0	3.02	139	4.176
5-Sep-17	14:24.0	19.579	73.7	0	0.1242	1.01	5.03	134.8	4.327
5-Sep-17	14:24.0	23.689	50.9	0	0.1242	0	0	130.6	4.351
30-Sep-17	14:24.0	28.766	41.9	0	0.1242	0	0	123.5	4.273
4-Sep-17	14:24.0	22.657	56.1	0	0.1242	1.51	6.04	143.2	4.339
21-Mar-18	49:17.0	24.098	89.7	0	0.1246	0	0	155.8	4.128
21-Mar-18	49:17.0	25.793	89.2	0	0.1246	0	0	182.5	4.206
21-Mar-18	49:17.0	25.137	91.5	0	0.1246	0	0	182.5	4.2
21-Mar-18	49:17.0	33.704	55.5	0	0.1246	0	1.51	136.2	4.279
21-Mar-18	49:17.0	22.992	91.7	0	0.1246	0	0	155.8	4.128
3-Oct-17	14:24.0	27.358	48.3	0	0.1246	0	0	130.6	4.206
30-Sep-17	14:24.0	30.646	37.8	0	0.1246	0.5	6.04	127.8	4.339
28-Sep-17	14:24.0	32.175	43.4	0	0.1246	1.51	6.04	133.4	4.375
1-Oct-17	14:24.0	28.072	43	0	0.1246	0	0	119.3	4.291
1-Oct-17	14:24.0	29.389	43.4	0	0.1246	0	0	120.7	4.327
30-Sep-17	14:24.0	24.146	58.7	0	0.1246	1.51	6.54	126.4	4.206
30-Sep-17	14:24.0	27.063	45.2	0	0.1246	0	0	130.6	4.212
1-Oct-17	14:24.0	24.944	52.7	0	0.1246	0	0	126.4	4.212
30-Sep-17	14:24.0	27.604	45.2	0	0.1246	0	0	133.4	4.237
1-Oct-17	14:24.0	23.93	56.5	0	0.1246	0	0	127.8	4.206
29-Sep-17	14:24.0	21.246	81.5	0	0.1246	0	6.04	130.6	4.188
29-Sep-17	14:24.0	21.533	81.1	0	0.1246	0	0	139	4.188
29-Sep-17	14:24.0	22.226	77.6	0	0.1246	0.5	8.05	137.6	4.2
28-Sep-17	14:24.0	22.681	75.5	0	0.1246	1.51	8.05	133.4	4.2
28-Sep-17	14:24.0	29.389	42.4	0	0.1246	1.01	7.55	132	4.231
3-Oct-17	14:24.0	28.221	47	0	0.1246	0	0	109.5	4.218
30-Sep-17	14:24.0	27.063	45.8	0	0.1246	0	0	130.6	4.224
3-Oct-17	14:24.0	22.705	63.6	0	0.1246	0	0	133.4	4.2
2-Sep-17	14:24.0	22.369	54.8	0	0.1246	0	2.52	139	4.224
4-Oct-17	14:24.0	26.475	46.9	0	0.1246	0	0	103.9	4.243
4-Oct-17	14:24.0	33.966	28	0	0.1246	1.51	5.54	53.3	4.345
4-Oct-17	14:24.0	35.182	26.6	0	0.1246	1.01	5.54	57.6	4.345
4-Oct-17	14:24.0	34.624	29.5	0	0.1246	0	3.02	44.9	4.4
1-Oct-17	14:24.0	27.087	43.2	0	0.1246	0	0	136.2	4.255
3-Oct-17	14:24.0	29.115	46.8	0	0.1246	0	0	119.3	4.231
28-Sep-17	14:24.0	30.773	49.4	0	0.1246	1.01	6.54	140.4	4.315
3-Oct-17	14:24.0	24.05	56.8	0	0.1246	0	0	123.5	4.2
2-Oct-17	14:24.0	24.75	53.3	0	0.1246	0	0	110.9	4.206
2-Oct-17	14:24.0	25.89	50.1	0	0.1246	0	0	116.5	4.206
2-Oct-17	14:24.0	29.165	46.5	0	0.1246	0	4.53	117.9	4.261
2-Oct-17	14:24.0	31.103	41.7	0	0.1246	1.51	6.54	122.1	4.345
1-Oct-17	14:24.0	22.872	60	0	0.1246	0	0	116.5	4.206
3-Oct-17	14:24.0	27.776	48.2	0	0.1246	0	0	127.8	4.212
23-Sep-17	14:24.0	16.558	86.4	0	0.1246	0	0	137.6	4.194
28-Sep-17	14:24.0	31.357	38.6	0	0.1246	2.52	8.05	136.2	4.339
25-Sep-17	14:24.0	20.174	72	0	0.1246	0	4.53	137.6	4.2
24-Sep-17	14:24.0	26.94	46	0	0.1246	0	0	127.8	4.321
24-Sep-17	14:24.0	18.913	84.8	0	0.1246	1.51	5.54	137.6	4.188
24-Sep-17	14:24.0	19.08	82.5	0	0.1246	2.01	6.54	139	4.2
25-Sep-17	14:24.0	31.689	35.2	0	0.1246	0.5	4.53	144.6	4.393
23-Sep-17	14:24.0	33.626	31.8	0	0.1246	0.5	4.03	71.6	4.345
25-Sep-17	14:24.0	22.13	56.1	0	0.1246	0	0	136.2	4.206
23-Sep-17	14:24.0	18.414	82.6	0	0.1246	0	0	137.6	4.2
22-Sep-17	14:24.0	30.571	43.7	0	0.1246	1.01	6.04	132	4.351
22-Sep-17	14:24.0	28.147	51.6	0	0.1246	0.5	4.53	116.5	4.339
22-Sep-17	14:24.0	17.368	92.1	0	0.1246	0	0	136.2	4.176
22-Sep-17	14:24.0	17.106	90.9	0	0.1246	0	0	136.2	4.206
22-Sep-17	14:24.0	19.413	87	0	0.1246	0	0	133.4	4.188
24-Sep-17	14:24.0	19.579	77.8	0	0.1246	0.5	5.54	147.4	4.2
27-Sep-17	14:24.0	25.623	43.4	0	0.1246	0	0	68.8	4.2
28-Sep-17	14:24.0	30.495	54.2	0	0.1246	0	0	140.4	4.321
28-Sep-17	14:24.0	22.154	85.2	0	0.1246	0	1.51	137.6	4.182
28-Sep-17	14:24.0	22.226	84.6	0	0.1246	0	4.53	134.8	4.2
28-Sep-17	14:24.0	22.657	84.3	0	0.1246	0	4.03	134.8	4.194
28-Sep-17	14:24.0	23.16	82.2	0	0.1246	1.01	5.54	144.6	4.2
25-Sep-17	14:24.0	19.413	75.2	0	0.1246	0	0	134.8	4.2
27-Sep-17	14:24.0	33.73	32.3	0	0.1246	3.52	8.56	36.5	4.339
17-Sep-17	14:24.0	28.866	31.5	0	0.1246	0	0	1.4	4.309
27-Sep-17	14:24.0	26.109	38.1	0	0.1246	0	0	133.4	4.2
26-Sep-17	14:24.0	27.456	30.7	0	0.1246	0	0	77.2	4.2
26-Sep-17	14:24.0	26.916	32.8	0	0.1246	0	0	101.1	4.206
26-Sep-17	14:24.0	37.783	14.6	0	0.1246	1.01	5.54	46.3	4.393
26-Sep-17	14:24.0	20.555	65	0	0.1246	0	0	127.8	4.2
26-Sep-17	14:24.0	20.484	60	0	0.1246	0	0	120.7	4.2
27-Sep-17	14:24.0	36.661	22.9	0	0.1246	1.51	5.54	71.6	4.363
10-Sep-17	14:24.0	18.913	89.3	0	0.1246	0	1.51	103.9	4.188
4-Sep-17	14:24.0	14.505	79.2	0	0.1246	0	0	157.2	4.188
4-Sep-17	14:24.0	24.823	51.7	0	0.1246	0.5	5.03	146	4.387
4-Sep-17	14:24.0	22.633	58.7	0	0.1246	2.01	6.04	144.6	4.333
30-Aug-17	14:24.0	27.628	33.8	0	0.1246	0	4.03	158.6	4.333
29-Aug-17	14:24.0	22.537	50.6		0.1246	0	0	129.2	4.369
10-Sep-17	14:24.0	18.842	89.8	0	0.1246	0	2.01	126.4	4.188
13-Sep-17	14:24.0	20.388	65.4	0	0.1246	0	0	92.7	4.218
5-Sep-17	14:24.0	18.057	83.3	0	0.1246	0.5	4.03	139	4.206
1-Sep-17	14:24.0	13.425	88.6	0	0.1246	0	0	130.6	4.194
29-Aug-17	14:24.0	14.218	87.2	0	0.1246	0	0	132	4.182
29-Aug-17	14:24.0	21.294	63.5	0	0.1246	0	0	115.1	4.333
1-Sep-17	14:24.0	16.915	64	0	0.1246	0	0	119.3	4.206
29-Aug-17	14:24.0	23.761	51.6	0	0.1246	0	0	108.1	4.321
31-Aug-17	14:24.0	13.112	83.5	0	0.1246	0	0	120.7	4.212
1-Sep-17	14:24.0	27.998	36.9	0	0.1246	0.5	3.52	59	4.333
3-Sep-17	14:24.0	26.012	44.6	0	0.1246	2.01	8.56	123.5	4.339
27-Aug-17	14:24.0	16.106	91.3	0	0.1246	0	0	140.4	4.188
1-Sep-17	14:24.0	30.495	32.2	0	0.1246	0.5	3.02	282.2	4.363
31-Aug-17	14:24.0	28.072	30.4	0	0.1246	1.01	5.03	132	4.321
30-Aug-17	14:24.0	15.318	63.6	0	0.1246	0	1.01	144.6	4.2
30-Aug-17	14:24.0	15.748	60.8	0	0.1246	0	1.51	144.6	4.206
28-Aug-17	14:24.0	20.246	71.1	0	0.1246	0	0	150.2	4.363
4-Sep-17	14:24.0	17.582	69.3	0	0.1246	0.5	5.54	122.1	4.2
1-Sep-17	14:24.0	13.016	92	0	0.1246	0	0	130.6	4.182
1-Sep-17	14:24.0	13.762	90.9	0	0.1246	0	0	130.6	4.188
30-Aug-17	14:24.0	14.505	71.2	0	0.1246	0	1.01	133.4	4.2
31-Aug-17	14:24.0	12.316	88.8	0	0.1246	0	0	120.7	4.188
10-Sep-17	14:24.0	19.413	87.3	0	0.1246	0	0	139	4.2
5-Sep-17	14:24.0	24.798	42.4	0	0.1246	1.01	6.04	132	4.387
2-Sep-17	14:24.0	20.555	71.3	0	0.1246	1.01	5.54	130.6	4.206
2-Sep-17	14:24.0	27.038	54	0	0.1246	1.01	4.03	140.4	4.363
2-Sep-17	14:24.0	23.04	69.1	0	0.1246	1.01	5.03	150.2	4.369
2-Sep-17	14:24.0	18.033	88.3	0	0.1246	0	4.53	140.4	4.194
2-Sep-17	14:24.0	22.968	53.7	0	0.1246	0	3.52	130.6	4.249
1-Sep-17	14:24.0	13.112	85.8	0	0.1246	0	0	130.6	4.2
2-Sep-17	14:24.0	26.842	49.2	0	0.1246	0.5	5.03	137.6	4.333
2-Sep-17	14:24.0	21.485	56.5	0	0.1246	0	2.01	133.4	4.237
15-Sep-17	14:24.0	15.724	72.6	0	0.1246	0	0	124.9	4.188
15-Sep-17	14:24.0	19.365	67.6	0	0.1246	0	0	124.9	4.194
16-Sep-17	14:24.0	24.146	69.8	0	0.1246	0	1.51	192.3	4.387
2-Sep-17	14:24.0	21.795	60.4	0	0.1246	0.5	3.52	133.4	4.218
15-Sep-17	14:24.0	21.939	62.4	0	0.1246	0	0	124.9	4.224
3-Sep-17	14:24.0	25.453	52.4	0	0.1246	1.01	7.05	120.7	4.321
2-Sep-17	14:24.0	21.127	64.7	0	0.1246	0.5	4.53	136.2	4.212
14-Sep-17	14:24.0	27.382	35.8	0	0.1246	0	0	42.1	4.321
3-Sep-17	14:24.0	26.402	47.3	0	0.1246	2.01	7.55	130.6	4.369
10-Sep-17	14:24.0	18.985	88.5	0	0.1246	0	0	132	4.2
2-Sep-17	14:24.0	24.605	50.6	0	0.1246	0.5	5.54	133.4	4.297
3-Sep-17	14:24.0	19.127	82.5	0	0.1246	1.01	8.05	129.2	4.2
3-Sep-17	14:24.0	20.031	78.5	0	0.1246	2.01	7.55	129.2	4.2
21-Mar-18	49:17.0	22.561	91.5	0	0.1251	0	0	155.8	4.14
19-Mar-18	49:17.0	24.243	94.5	0.2	0.1251	0	0	68.8	4.357
20-Mar-18	49:17.0	24.823	89.7	0	0.1251	0	0	210.6	4.273
20-Mar-18	49:17.0	28.048	80.3	0	0.1251	0	2.01	255.5	4.333
20-Mar-18	49:17.0	32.201	63.1	0	0.1251	0	1.51	272.4	4.393
20-Mar-18	49:17.0	34.995	50.9	0	0.1251	0	1.01	221.8	4.339
20-Mar-18	49:17.0	37.48	42	0	0.1251	0	1.51	134.8	4.333
21-Mar-18	49:17.0	22.106	92.4	0	0.1251	0	0	155.8	4.134
21-Mar-18	49:17.0	26.085	88.2	0	0.1251	0	0	182.5	4.218
21-Mar-18	49:17.0	26.646	86.8	0	0.1251	0	0	182.5	4.231
21-Mar-18	49:17.0	28.171	83.4	0	0.1251	0	0	182.5	4.255
20-Mar-18	49:17.0	37.069	45.1	0	0.1251	0	2.01	151.6	4.303
25-Aug-17	14:24.0	27.087	47.3	0	0.1251	0	0	35.1	4.333
19-Sep-17	14:24.0	19.746	86.3	0	0.1251	0	3.02	127.8	4.176
19-Sep-17	14:24.0	19.484	86.4	0	0.1251	0	3.52	120.7	4.188
20-Sep-17	14:24.0	22.609	84.3	0	0.1251	0	0	132	4.267
2-Sep-17	14:24.0	21.604	54.8	0	0.1251	0	0	136.2	4.206
20-Sep-17	14:24.0	25.307	74	0	0.1251	0	0	133.4	4.387
19-Sep-17	14:24.0	21.581	80.5	0	0.1251	0	0	139	4.333
9-Sep-17	14:24.0	26.916	43.6	0	0.1251	0	0	53.3	4.339
20-Sep-17	14:24.0	21.27	87.4	0	0.1251	0	0	136.2	4.194
2-Oct-17	14:24.0	28.518	46.4	0	0.1251	0	0	120.7	4.224
20-Sep-17	14:24.0	20.293	89.6	0	0.1251	0	0	132	4.188
8-Sep-17	14:24.0	20.007	70.6	0	0.1251	0	0.5	140.4	4.206
8-Sep-17	14:24.0	18.414	75.4	0	0.1251	0	0.5	140.4	4.2
9-Sep-17	14:24.0	25.477	49.5	0	0.1251	1.01	5.03	43.5	4.381
9-Sep-17	14:24.0	23.881	58.9	0	0.1251	0.5	3.52	127.8	4.369
26-Sep-17	14:24.0	28.295	35.5	0	0.1251	0	0	113.7	4.206
9-Sep-17	14:24.0	18.842	75.4	0	0.1251	0	1.51	134.8	4.224
9-Sep-17	14:24.0	16.582	78.5	0	0.1251	0	0.5	143.2	4.188
30-Aug-17	14:24.0	29.09	34.2	0	0.1251	0	0	157.2	4.381
1-Oct-17	14:24.0	26.085	48.5	0	0.1251	0	0	123.5	4.224
7-Sep-17	14:24.0	31.51	29.1	0	0.1251	2.01	8.56	40.7	4.321
1-Oct-17	14:24.0	25.793	49.8	0	0.1251	0	0	122.1	4.218
2-Sep-17	14:24.0	19.436	73	0	0.1251	0	4.03	130.6	4.206
26-Sep-17	14:24.0	28.072	30.3	0	0.1251	0	0	129.2	4.206
9-Sep-17	14:24.0	15.676	77.1	0	0.1251	0	0	143.2	4.188
25-Sep-17	14:24.0	23.497	48.2	0	0.1251	0	0	136.2	4.206
2-Sep-17	14:24.0	18.343	86	0	0.1251	0	5.03	133.4	4.2
29-Aug-17	14:24.0	14.529	84.1	0	0.1251	0	0	155.8	4.194
28-Sep-17	14:24.0	32.227	39.7	0	0.1251	2.01	7.55	130.6	4.393
22-Sep-17	14:24.0	21.246	80.8	0	0.1251	0	4.53	133.4	4.2
22-Sep-17	14:24.0	21.056	80.3	0	0.1251	0	0	134.8	4.2
29-Aug-17	14:24.0	25.428	44.2	0	0.1251	0	0	129.2	4.363
22-Sep-17	14:24.0	18.295	88.8	0	0.1251	0	0	134.8	4.188
29-Aug-17	14:24.0	24.919	42.1	0	0.1251	0	4.53	129.2	4.351
28-Aug-17	14:24.0	16.082	91.5	0	0.1251	0	0	134.8	4.188
22-Sep-17	14:24.0	31.816	40.8	0	0.1251	0.5	5.03	150.2	4.315
28-Sep-17	14:24.0	27.85	50.5	0	0.1251	0.5	9.06	130.6	4.224
23-Sep-17	14:24.0	31.791	36.6	0	0.1251	0.5	3.52	95.5	4.315
2-Sep-17	14:24.0	27.014	49.5	0	0.1251	0	5.54	139	4.351
28-Sep-17	14:24.0	24.484	77.9	0	0.1251	1.51	6.04	146	4.2
2-Sep-17	14:24.0	26.304	46.9	0	0.1251	1.01	5.54	139	4.339
23-Sep-17	14:24.0	20.674	71.6	0	0.1251	0	0	137.6	4.206
23-Sep-17	14:24.0	19.532	76.3	0	0.1251	0	0	139	4.2
23-Sep-17	14:24.0	18.937	80.5	0	0.1251	0	0	137.6	4.2
22-Sep-17	14:24.0	29.916	46.5	0	0.1251	1.01	4.53	141.8	4.393
2-Oct-17	14:24.0	27.801	47.1	0	0.1251	0	0	119.3	4.224
24-Sep-17	14:24.0	21.533	68	0	0.1251	0.5	5.54	136.2	4.2
27-Aug-17	14:24.0	16.82	90.7	0	0.1251	0	0	136.2	4.224
27-Aug-17	14:24.0	18.842	83.7	0	0.1251	0	0	136.2	4.357
27-Aug-17	14:24.0	22.082	67.1	0	0.1251	0	0	129.2	4.381
27-Aug-17	14:24.0	24.219	57.5	0	0.1251	0	0	129.2	4.345
29-Aug-17	14:24.0	15.294	59.7	0	0.1251	0	0	150.2	4.212
28-Aug-17	14:24.0	17.415	79.4	0	0.1251	0	0	133.4	4.206
28-Sep-17	14:24.0	30.419	38.3	0	0.1251	2.52	7.55	139	4.285
27-Sep-17	14:24.0	36.552	22.3	0	0.1251	1.51	5.54	78.6	4.393
29-Aug-17	14:24.0	15.533	79.9	0	0.1251	0	0	141.8	4.2
28-Aug-17	14:24.0	15.199	91.5	0	0.1251	0	0	134.8	4.188
28-Aug-17	14:24.0	18.557	81.7	0	0.1251	0	0	148.8	4.357
21-Sep-17	14:24.0	23.545	77.3	0	0.1251	0	0	139	4.339
21-Sep-17	14:24.0	24.968	72.8	0	0.1251	0	0	140.4	4.351
23-Sep-17	14:24.0	35.448	17.5	0	0.1251	0.5	4.53	136.2	4.333
28-Sep-17	14:24.0	24.243	70.1	0	0.1251	0.5	8.05	130.6	4.212
23-Sep-17	14:24.0	36.146	24.6	0	0.1251	0.5	3.52	130.6	4.345
2-Sep-17	14:24.0	18.557	81.8	0	0.1251	0.5	4.53	127.8	4.2
28-Aug-17	14:24.0	16.201	83.6	0	0.1251	0	0	133.4	4.224
13-Sep-17	14:24.0	28.891	39.4	0	0.1251	0	7.05	47.7	4.321
3-Sep-17	14:24.0	20.793	58.3	0	0.1251	0	1.51	137.6	4.237
14-Sep-17	14:24.0	15.724	72	0	0.1251	0	0	123.5	4.188
14-Sep-17	14:24.0	16.082	69.6	0	0.1251	0	0	129.2	4.194
1-Sep-17	14:24.0	16.773	73.2	0	0.1251	0	1.51	129.2	4.2
1-Sep-17	14:24.0	15.414	82.2	0	0.1251	0	0.5	132	4.2
5-Sep-17	14:24.0	28.518	35.4	0	0.1251	0.5	4.53	129.2	4.327
4-Sep-17	14:24.0	17.867	81	0	0.1251	0	5.03	126.4	4.218
4-Sep-17	14:24.0	18.461	75.7	0	0.1251	0.5	3.52	129.2	4.224
14-Sep-17	14:24.0	25.307	40.8	0	0.1251	0	2.52	42.1	4.212
13-Sep-17	14:24.0	29.64	36.2	0	0.1251	0	5.03	44.9	4.339
14-Sep-17	14:24.0	29.565	31.7	0	0.1251	0	3.52	44.9	4.351
13-Sep-17	14:24.0	26.378	44.7	0	0.1251	0	5.03	43.5	4.345
4-Sep-17	14:24.0	23.954	53.2	0	0.1251	1.51	6.54	129.2	4.381
4-Sep-17	14:24.0	24.243	54.2	0	0.1251	1.51	6.04	134.8	4.327
4-Sep-17	14:24.0	23.833	53.9	0	0.1251	1.51	6.04	137.6	4.333
4-Sep-17	14:24.0	17.13	65.5	0	0.1251	0.5	4.53	126.4	4.2
3-Sep-17	14:24.0	18.842	72.3	0	0.1251	0	7.05	130.6	4.206
26-Sep-17	14:24.0	36.281	17.5	0	0.1251	1.01	6.04	43.5	4.321
13-Sep-17	14:24.0	15.843	75.7	0	0.1251	0	0	92.7	4.182
2-Oct-17	14:24.0	27.702	46.1	0	0.1251	0	0	120.7	4.212
4-Sep-17	14:24.0	18.889	72	0	0.1251	0	3.02	124.9	4.224
25-Sep-17	14:24.0	30.9	35.1	0	0.1251	0.5	4.53	132	4.321
15-Sep-17	14:24.0	32.51	26.3	0	0.1251	0	6.04	130.6	4.333
25-Sep-17	14:24.0	24.291	46.9	0	0.1251	0	0	127.8	4.212
25-Sep-17	14:24.0	25.453	45.1	0	0.1251	0	0	132	4.218
25-Sep-17	14:24.0	24.629	48.5	0	0.1251	0	0	144.6	4.249
16-Sep-17	14:24.0	18.747	88.4	0	0.1251	0	0	140.4	4.182
16-Sep-17	14:24.0	19.103	87.2	0	0.1251	0	0	110.9	4.2
16-Sep-17	14:24.0	20.793	81.9	0	0.1251	0	0	141.8	4.375
16-Sep-17	14:24.0	27.382	57	0	0.1251	0	2.52	99.7	4.351
14-Sep-17	14:24.0	21.915	48.9	0	0.1251	0	0	22.5	4.176
15-Sep-17	14:24.0	31.077	27.7	0	0.1251	0	3.52	73	4.351
13-Sep-17	14:24.0	15.915	74.7	0	0.1251	0	0	102.5	4.188
15-Sep-17	14:24.0	16.915	74.6	0	0.1251	0	0	124.9	4.182
6-Sep-17	14:24.0	28.493	42.9	0	0.1251	0	0	44.9	4.339
6-Sep-17	14:24.0	22.872	64.1	0	0.1251	0	4.03	112.3	4.267
6-Sep-17	14:24.0	15.127	90.1	0	0.1251	0	1.01	122.1	4.182
15-Sep-17	14:24.0	19.936	62.8	0	0.1251	0	0	123.5	4.2
25-Sep-17	14:24.0	31.714	32.9	0	0.1251	1.01	5.54	137.6	4.315
15-Sep-17	14:24.0	20.889	50.9	0	0.1251	0	0	95.5	4.2
25-Sep-17	14:24.0	31.663	33.9	0	0.1251	0.5	4.53	129.2	4.339
14-Sep-17	14:24.0	30.95	29.7	0	0.1251	0	0.5	30.9	4.327
31-Aug-17	14:24.0	20.103	52.7	0	0.1251	0	2.01	134.8	4.224
26-Sep-17	14:24.0	37.618	15.7	0	0.1251	1.01	5.03	47.7	4.345
4-Oct-17	14:24.0	32.536	28.3	0	0.1251	1.01	5.54	54.8	4.267
31-Aug-17	14:24.0	16.32	69.2	0	0.1251	0	2.01	127.8	4.2
31-Aug-17	14:24.0	17.439	53.1	0	0.1251	0	2.01	99.7	4.206
18-Sep-17	14:24.0	19.294	83.9	0	0.1251	0	0	130.6	4.206
18-Sep-17	14:24.0	19.508	84.1	0	0.1251	0	0	136.2	4.182
18-Sep-17	14:24.0	20.555	81.2	0	0.1251	0	0	119.3	4.291
4-Oct-17	14:24.0	30.167	35.2	0	0.1251	0	0	73	4.224
18-Sep-17	14:24.0	25.331	64	0	0.1251	0	2.01	89.9	4.345
24-Sep-17	14:24.0	21.939	65.3	0	0.1251	0	6.54	133.4	4.206
30-Aug-17	14:24.0	16.606	54.7	0	0.1251	0	0	78.6	4.206
10-Sep-17	14:24.0	20.198	83.5	0	0.1251	0	0	134.8	4.2
10-Sep-17	14:24.0	21.318	76.6	0	0.1251	0	0	133.4	4.206
7-Sep-17	14:24.0	22.274	73	0	0.1251	0	2.01	124.9	4.2
26-Sep-17	14:24.0	34.281	19.5	0	0.1251	0.5	3.52	37.9	4.249
26-Sep-17	14:24.0	31.637	23.6	0	0.1251	0	0	37.9	4.224
24-Sep-17	14:24.0	29.315	40.9	0	0.1251	0	0	127.8	4.339
9-Sep-17	14:24.0	30.773	32.3	0	0.1251	0	4.53	51.9	4.339
2-Oct-17	14:24.0	26.94	47.7	0	0.1251	0	0	116.5	4.206
18-Sep-17	14:24.0	22.705	73.9	0	0.1251	0	0	108.1	4.363
17-Sep-17	14:24.0	23.112	42.2	0	0.1251	0	0	74.4	4.188
12-Sep-17	14:24.0	30.394	36.1	0	0.1251	0	0	57.6	4.393
12-Sep-17	14:24.0	26.573	45.1	0	0.1251	0	4.03	84.2	4.351
12-Sep-17	14:24.0	23.28	59	0	0.1251	0	2.52	119.3	4.321
12-Sep-17	14:24.0	20.174	69.8	0	0.1251	0	1.51	117.9	4.218
12-Sep-17	14:24.0	15.748	78.2	0	0.1251	0	0	117.9	4.182
10-Sep-17	14:24.0	32.536	37.1	0	0.1251	1.01	5.03	80	4.309
12-Sep-17	14:24.0	14.697	80.4	0	0.1251	0	0	117.9	4.188
4-Oct-17	14:24.0	28.965	42.7	0	0.1251	0	0	95.5	4.218
17-Sep-17	14:24.0	19.984	52	0	0.1251	0	0	29.5	4.182
17-Sep-17	14:24.0	31.001	25.8	0	0.1251	0	0	19.7	4.363
4-Oct-17	14:24.0	27.727	45.3	0	0.1251	0	0	87	4.212
25-Sep-17	14:24.0	21.008	67.8	0	0.1251	0	5.54	133.4	4.2
31-Aug-17	14:24.0	27.456	28.9	0	0.1251	1.51	5.54	129.2	4.339
17-Sep-17	14:24.0	26.402	37.7	0	0.1251	0	0	5.6	4.218
1-Sep-17	14:24.0	30.469	34.4	0	0.1251	1.01	4.53	262.5	4.333
20-Mar-18	49:17.0	24.002	85.3	0	0.1256	0	0	155.8	4.152
20-Mar-18	49:17.0	35.77	45.9	0	0.1256	0	2.01	137.6	4.339
21-Mar-18	49:17.0	22.609	90.1	0	0.1256	0	0	155.8	4.14
20-Mar-18	49:17.0	21.676	92.8	0	0.1256	0	0	210.6	4.14
20-Mar-18	49:17.0	22.489	92.2	0	0.1256	0	0	210.6	4.134
21-Mar-18	49:17.0	29.54	74.9	0	0.1256	0	0	182.5	4.303
20-Mar-18	49:17.0	35.77	47.5	0	0.1256	0	1.51	143.2	4.321
20-Nov-18	14:24.0	25.477	69.3	0	0.1256	0	0	39.3	4.2
21-Mar-18	49:17.0	23.472	87.5	0	0.1256	0	0	155.8	4.146
21-Mar-18	49:17.0	29.515	88.8	0	0.1256	0	0	182.5	4.339
20-Mar-18	49:17.0	23.328	92.9	0	0.1256	0	0	210.6	4.128
21-Mar-18	49:17.0	27.974	91.4	7.4	0.1256	0	1.01	182.5	4.333
16-May-17	14:24.0	22.25	79.1	0	0.1256	0	0	162.9	4.255
27-Sep-17	14:24.0	31.077	36.1	0	0.1256	0	0	119.3	4.212
29-Aug-17	14:24.0	16.796	57.9	0	0.1256	0	2.01	147.4	4.212
27-Sep-17	14:24.0	36.039	21.3	0	0.1256	1.01	4.53	98.3	4.297
26-Sep-17	14:24.0	29.464	34.6	0	0.1256	0	0	96.9	4.218
27-Sep-17	14:24.0	30.394	41.2	0	0.1256	0	0	126.4	4.206
27-Sep-17	14:24.0	33.443	28.7	0	0.1256	1.01	4.53	119.3	4.237
31-Aug-17	14:24.0	27.924	29.3	0	0.1256	1.51	6.04	140.4	4.393
8-Sep-17	14:24.0	26.378	46.9	0	0.1256	0.5	5.54	49.1	4.291
30-Aug-17	14:24.0	29.165	31.4	0	0.1256	0	4.03	167.1	4.339
31-Aug-17	14:24.0	27.653	32.6	0	0.1256	1.01	6.04	144.6	4.315
30-Aug-17	14:24.0	19.08	45	0	0.1256	0	0.5	130.6	4.237
30-Aug-17	14:24.0	18.699	49.2	0	0.1256	0	1.01	122.1	4.212
27-Sep-17	14:24.0	34.677	26	0	0.1256	1.01	6.04	105.3	4.273
10-Sep-17	14:24.0	30.318	39.4	0	0.1256	0.5	7.55	47.7	4.339
12-Sep-17	14:24.0	16.129	77.5	0	0.1256	0	0.5	117.9	4.194
12-Sep-17	14:24.0	18.271	70.4	0	0.1256	0	0	133.4	4.2
12-Sep-17	14:24.0	18.343	72.7	0	0.1256	0	0	134.8	4.2
12-Sep-17	14:24.0	19.008	64.7	0	0.1256	0	0	134.8	4.2
11-Sep-17	14:24.0	19.318	88.8	0	0.1256	0	0	124.9	4.206
8-Sep-17	14:24.0	19.627	73.5	0	0.1256	0	0	139	4.182
10-Sep-17	14:24.0	31.306	35.3	0	0.1256	0.5	4.03	109.5	4.393
13-Sep-17	14:24.0	16.392	73.3	0	0.1256	0	0	136.2	4.2
10-Sep-17	14:24.0	29.565	45.7	0	0.1256	1.51	4.53	44.9	4.387
10-Sep-17	14:24.0	27.776	55	0	0.1256	1.01	4.53	73	4.339
24-Aug-17	14:24.0	15.819	79.1	0	0.1256	0	0	109.5	4.2
24-Aug-17	14:24.0	15.915	83.6	0	0.1256	0	0	109.5	4.2
24-Aug-17	14:24.0	27.456	44	0	0.1256	0	0	89.9	4.357
9-Sep-17	14:24.0	22.633	65.3	0	0.1256	0	0	123.5	4.206
10-Sep-17	14:24.0	30.798	39	0	0.1256	1.01	5.54	113.7	4.363
14-Sep-17	14:24.0	33.053	23.7	0	0.1256	0	0	35.1	4.351
16-Sep-17	14:24.0	18.604	87	0	0.1256	0	0	132	4.2
16-Sep-17	14:24.0	18.652	88.5	0	0.1256	0	0	103.9	4.188
16-Sep-17	14:24.0	18.652	88.6	0	0.1256	0	0	136.2	4.188
16-Sep-17	14:24.0	29.715	47.6	0	0.1256	0.5	4.03	126.4	4.369
15-Sep-17	14:24.0	32.613	25.4	0	0.1256	0	0	91.3	4.321
15-Sep-17	14:24.0	29.215	33.1	0	0.1256	0.5	5.54	74.4	4.381
12-Sep-17	14:24.0	28.444	39.1	0	0.1256	0	0	46.3	4.333
15-Sep-17	14:24.0	22.298	45.5	0	0.1256	0	0	78.6	4.2
12-Sep-17	14:24.0	31.944	31.5	0	0.1256	0	0	75.8	4.339
14-Sep-17	14:24.0	16.915	64.8	0	0.1256	0	1.01	129.2	4.2
14-Sep-17	14:24.0	18.152	58.4	0	0.1256	0	0.5	129.2	4.2
14-Sep-17	14:24.0	21.27	46.3	0	0.1256	0	1.51	136.2	4.206
13-Sep-17	14:24.0	32.613	31.2	0	0.1256	0	5.54	57.6	4.315
13-Sep-17	14:24.0	16.749	73.5	0	0.1256	0	0	144.6	4.188
25-Aug-17	14:24.0	28.147	45.1	0	0.1256	0	0	47.7	4.375
15-Sep-17	14:24.0	19.888	57.9	0	0.1256	0	0	123.5	4.2
29-Aug-17	14:24.0	25.089	41.6	0	0.1256	0	0	130.6	4.351
9-Sep-17	14:24.0	30.52	37	0	0.1256	0.5	4.03	120.7	4.351
28-Aug-17	14:24.0	25.016	54.7	0	0.1256	0	0	140.4	4.357
28-Aug-17	14:24.0	24.823	50.3	0	0.1256	0	0	127.8	4.369
28-Aug-17	14:24.0	25.695	50	0	0.1256	0	0	132	4.351
28-Aug-17	14:24.0	20.65	59	0	0.1256	0	0	124.9	4.224
29-Aug-17	14:24.0	17.034	73.5	0	0.1256	0	0	129.2	4.206
28-Aug-17	14:24.0	15.915	89.8	0	0.1256	0	0	126.4	4.194
29-Aug-17	14:24.0	26.549	39.4	0	0.1256	0	5.03	134.8	4.321
28-Aug-17	14:24.0	15.748	87.2	0	0.1256	0	0	133.4	4.2
29-Aug-17	14:24.0	23.088	44.8	0	0.1256	0	0	119.3	4.321
29-Aug-17	14:24.0	20.841	44.5	0	0.1256	0	1.51	120.7	4.261
29-Aug-17	14:24.0	17.344	54.9	0	0.1256	0	1.51	126.4	4.224
29-Aug-17	14:24.0	18.604	54	0	0.1256	0	1.51	113.7	4.224
27-Sep-17	14:24.0	26.867	60.9	0	0.1256	0	5.03	119.3	4.2
27-Sep-17	14:24.0	28.072	57.7	0	0.1256	0	6.54	116.5	4.206
29-Aug-17	14:24.0	16.034	76.8	0	0.1256	0	0	134.8	4.2
27-Aug-17	14:24.0	17.558	80.5	0	0.1256	0	0	144.6	4.206
27-Sep-17	14:24.0	29.414	45	0	0.1256	0	0	126.4	4.206
9-Sep-17	14:24.0	16.463	72.5	0	0.1256	0	0	143.2	4.194
9-Sep-17	14:24.0	16.654	69.3	0	0.1256	0	0	143.2	4.2
8-Sep-17	14:24.0	31.103	38.1	0	0.1256	0	4.53	33.7	4.351
8-Sep-17	14:24.0	30.469	40.8	0	0.1256	0	0	47.7	4.321
8-Sep-17	14:24.0	28.122	44.1	0	0.1256	1.01	5.03	30.9	4.351
28-Aug-17	14:24.0	17.653	91.2	0	0.1256	0	0	132	4.237
8-Sep-17	14:24.0	19.389	77.3	0	0.1256	0	0	140.4	4.206
9-Sep-17	14:24.0	32.613	28.9	0	0.1256	0.5	10.07	102.5	4.351
27-Aug-17	14:24.0	16.511	88.4	0	0.1256	0	0	144.6	4.2
27-Aug-17	14:24.0	16.272	90.2	0	0.1256	0	0	147.4	4.194
27-Aug-17	14:24.0	15.939	90.9	0	0.1256	0	0	144.6	4.188
27-Aug-17	14:24.0	26.646	45.4	0	0.1256	0	0	126.4	4.363
27-Aug-17	14:24.0	19.484	75.1	0	0.1256	0	0	129.2	4.212
28-Aug-17	14:24.0	18.414	78.3	0	0.1256	0	0	129.2	4.206
8-Sep-17	14:24.0	24.098	55.9	0	0.1256	0	0	47.7	4.206
22-Sep-17	14:24.0	30.469	42.2	0	0.1256	0	0	148.8	4.333
4-Sep-17	14:24.0	19.127	69.8	0	0.1256	0	3.02	124.9	4.243
21-Sep-17	14:24.0	28.295	49.4	0	0.1256	0	0	143.2	4.321
4-Sep-17	14:24.0	18.01	82.7	0	0.1256	0	3.52	133.4	4.206
21-Sep-17	14:24.0	25.258	54.9	0	0.1256	0	0	134.8	4.224
21-Sep-17	14:24.0	23.93	60.5	0	0.1256	0	0	139	4.212
21-Sep-17	14:24.0	22.13	77.4	0	0.1256	0	0	127.8	4.206
22-Sep-17	14:24.0	20.246	82.9	0	0.1256	0	0	134.8	4.194
20-Sep-17	14:24.0	20.412	88.9	0	0.1256	0	0	130.6	4.188
23-Sep-17	14:24.0	33.914	14.7	0	0.1256	1.51	5.54	129.2	4.321
22-Sep-17	14:24.0	31.893	39.3	0	0.1256	0	0	153	4.369
4-Sep-17	14:24.0	17.962	74.5	0	0.1256	0	0	126.4	4.206
22-Sep-17	14:24.0	29.916	40	0	0.1256	1.01	5.54	143.2	4.333
7-Sep-17	14:24.0	16.463	79.4	0	0.1256	0	0.5	120.7	4.2
21-Sep-17	14:24.0	26.378	66.8	0	0.1256	0	0	140.4	4.351
7-Sep-17	14:24.0	16.868	83.9	0	0.1256	0	1.51	109.5	4.188
7-Sep-17	14:24.0	17.011	87.4	0	0.1256	0	0.5	59	4.188
7-Sep-17	14:24.0	25.016	52.6	0	0.1256	1.51	4.53	57.6	4.279
22-Sep-17	14:24.0	22.441	65.6	0	0.1256	0	0	133.4	4.206
5-Sep-17	14:24.0	28.32	35.7	0	0.1256	0.5	5.54	165.7	4.363
21-Sep-17	14:24.0	21.342	86.4	0	0.1256	0	0	137.6	4.188
17-Sep-17	14:24.0	34.757	16.4	0	0.1256	1.01	6.54	49.1	4.363
17-Sep-17	14:24.0	33.209	22.8	0	0.1256	0	0	39.3	4.321
17-Sep-17	14:24.0	22.417	43.9	0	0.1256	0	0	42.1	4.188
17-Sep-17	14:24.0	23.569	42.1	0	0.1256	0	0	143.2	4.188
17-Sep-17	14:24.0	21.724	51.1	0	0.1256	0	0	143.2	4.2
18-Sep-17	14:24.0	19.27	84.8	0	0.1256	0	0	126.4	4.188
3-Sep-17	14:24.0	27.112	44	0	0.1256	2.01	6.54	136.2	4.339
3-Sep-17	14:24.0	25.671	44.7	0	0.1256	1.01	6.54	130.6	4.369
4-Sep-17	14:24.0	19.96	65.4	0	0.1256	0.5	5.54	123.5	4.267
18-Sep-17	14:24.0	27.998	54	0	0.1256	0	2.52	82.8	4.327
4-Sep-17	14:24.0	21.724	59.7	0	0.1256	1.01	6.54	119.3	4.321
21-Sep-17	14:24.0	21.557	85.2	0	0.1256	0	0	133.4	4.182
20-Sep-17	14:24.0	28.444	55.7	0	0.1256	0.5	4.03	110.9	4.327
21-Sep-17	14:24.0	21.748	84.7	0	0.1256	0	0	133.4	4.176
21-Sep-17	14:24.0	22.824	81.3	0	0.1256	0	0	133.4	4.255
20-Sep-17	14:24.0	20.603	88.8	0	0.1256	0	0	140.4	4.176
3-Sep-17	14:24.0	21.342	60.5	0	0.1256	0	0	129.2	4.224
3-Sep-17	14:24.0	20.913	63.6	0	0.1256	0	0	129.2	4.218
3-Sep-17	14:24.0	20.007	68.5	0	0.1256	0	0	130.6	4.212
18-Sep-17	14:24.0	19.294	84.8	0	0.1256	0	0	130.6	4.188
19-Sep-17	14:24.0	19.46	85.8	0	0.1256	0.5	4.03	124.9	4.188
6-Sep-17	14:24.0	29.665	36.8	0	0.1256	0.5	4.53	40.7	4.363
6-Sep-17	14:24.0	30.495	27.6	0	0.1256	0.5	5.03	30.9	4.315
1-Sep-17	14:24.0	27.112	35.2	0	0.1256	0	2.52	136.2	4.297
6-Sep-17	14:24.0	31.128	28.8	0	0.1256	0	0	42.1	4.351
24-Sep-17	14:24.0	28.27	39.9	0	0.1256	0	0	124.9	4.363
20-Sep-17	14:24.0	20.531	87.4	0	0.1256	0	0	129.2	4.194
24-Sep-17	14:24.0	26.646	43	0	0.1256	0	2.52	129.2	4.285
24-Sep-17	14:24.0	25.283	50.7	0	0.1256	0	0	136.2	4.224
19-Sep-17	14:24.0	19.555	85.2	0	0.1256	0	4.53	134.8	4.2
6-Sep-17	14:24.0	25.283	50.8	0	0.1256	0.5	3.02	46.3	4.4
24-Sep-17	14:24.0	22.537	65.1	0	0.1256	0	0	136.2	4.206
24-Sep-17	14:24.0	29.14	39.7	0	0.1256	0	0	126.4	4.387
1-Sep-17	14:24.0	31.535	32	0	0.1256	0.5	4.03	235.9	4.43
31-Aug-17	14:24.0	17.843	60.3	0	0.1256	0	0.5	119.3	4.212
25-Sep-17	14:24.0	28.717	40.6	0	0.1256	0	1.51	130.6	4.285
19-Sep-17	14:24.0	19.484	86.4	0	0.1256	0	3.52	120.7	4.182
19-Sep-17	14:24.0	20.674	83.8	0	0.1256	0	1.01	132	4.218
19-Sep-17	14:24.0	22.705	74.4	0	0.1256	0	0	134.8	4.363
19-Sep-17	14:24.0	26.426	63.9	0	0.1256	0	0	132	4.393
19-Sep-17	14:24.0	28.468	55.2	0	0.1256	0	0	119.3	4.345
25-Sep-17	14:24.0	26.573	45	0	0.1256	0	0	130.6	4.237
24-Sep-17	14:24.0	23.016	62.9	0	0.1256	0	0	140.4	4.212
7-Sep-17	14:24.0	27.85	42.9	0	0.1256	2.01	6.04	36.5	4.381
23-Sep-17	14:24.0	31.816	14.9	0	0.1256	1.01	6.04	136.2	4.267
23-Sep-17	14:24.0	27.825	19.8	0	0.1256	0	3.02	137.6	4.231
23-Sep-17	14:24.0	27.21	20.9	0	0.1256	0	0	139	4.212
24-Sep-17	14:24.0	22.848	67.5	0	0.1256	0	6.54	133.4	4.2
31-Aug-17	14:24.0	18.794	56.2	0	0.1256	0	1.51	127.8	4.218
6-Sep-17	14:24.0	18.057	85.1	0	0.1256	0	1.01	122.1	4.206
7-Sep-17	14:24.0	31.128	30.3	0	0.1256	1.01	6.04	75.8	4.381
7-Sep-17	14:24.0	29.916	38.3	0	0.1256	1.51	5.03	22.5	4.339
6-Sep-17	14:24.0	14.098	88.7	0	0.1256	0	0.5	122.1	4.188
6-Sep-17	14:24.0	14.194	86.6	0	0.1256	0	0.5	122.1	4.188
1-Sep-17	14:24.0	21.939	52.9	0	0.1256	0	1.01	133.4	4.224
1-Sep-17	14:24.0	22.106	51.4	0	0.1256	0	0	134.8	4.206
20-Mar-18	49:17.0	34.545	50.3	0	0.1261	0	2.01	147.4	4.297
20-Mar-18	49:17.0	24.677	82.5	0	0.1261	0	0	155.8	4.152
20-Nov-18	14:24.0	20.936	82.4	0	0.1261	0	0	39.3	4.152
20-Mar-18	49:17.0	25.258	80.1	0	0.1261	0	0	155.8	4.158
20-Nov-18	14:24.0	23.208	80.3	0	0.1261	0	0	116.5	4.146
20-Mar-18	49:17.0	21.652	92.3	0	0.1261	0	0	210.6	4.146
20-Mar-18	49:17.0	21.891	91.1	0	0.1261	0	0	210.6	4.152
20-Nov-18	14:24.0	27.677	62.2	0	0.1261	0	0	44.9	4.194
20-Nov-18	14:24.0	20.15	86.3	0	0.1261	0	0	116.5	4.146
20-Mar-18	49:17.0	21.032	92.7	0	0.1261	0	0	210.6	4.14
10-Sep-17	14:24.0	25.963	46.3	0	0.1261	0	0.5	116.5	4.237
17-Sep-17	14:24.0	35.555	13.1	0	0.1261	1.01	4.03	51.9	4.351
10-Sep-17	14:24.0	29.966	41.3	0	0.1261	0.5	5.03	119.3	4.351
18-Sep-17	14:24.0	20.936	68.6	0	0.1261	0	0	130.6	4.2
18-Sep-17	14:24.0	19.96	75.1	0	0.1261	0	0	120.7	4.2
24-Aug-17	14:24.0	20.913	70.6	0	0.1261	0	0	105.3	4.363
9-Sep-17	14:24.0	24.605	52.8	0	0.1261	0	0	132	4.212
9-Sep-17	14:24.0	25.38	47.8	0	0.1261	0	0	116.5	4.218
24-Aug-17	14:24.0	23.785	60.7	0	0.1261	0	0	82.8	4.393
18-Sep-17	14:24.0	19.127	81.7	0	0.1261	0	0	126.4	4.2
9-Sep-17	14:24.0	25.428	49.9	0	0.1261	0	2.01	127.8	4.224
9-Sep-17	14:24.0	27.751	44.3	0	0.1261	0	4.03	127.8	4.285
24-Aug-17	14:24.0	18.081	79.9	0	0.1261	0	0	109.5	4.224
10-Sep-17	14:24.0	25.21	46.3	0	0.1261	0	1.01	113.7	4.224
9-Sep-17	14:24.0	28.941	38.8	0	0.1261	0	0	50.5	4.339
24-Aug-17	14:24.0	29.715	36.7	0	0.1261	0	0	33.7	4.333
9-Sep-17	14:24.0	24.315	49.3	0	0.1261	0	0	117.9	4.218
19-Sep-17	14:24.0	19.793	81.4	0	0.1261	0	0	133.4	4.2
18-Sep-17	14:24.0	30.621	44.8	0	0.1261	0	0	113.7	4.363
7-Sep-17	14:24.0	16.677	77.2	0	0.1261	0	1.01	120.7	4.206
9-Sep-17	14:24.0	32.794	28.5	0	0.1261	1.01	5.54	64.6	4.309
24-Aug-17	14:24.0	17.344	72	0	0.1261	0	2.01	133.4	4.2
18-Sep-17	14:24.0	32.15	37.8	0	0.1261	0	1.51	124.9	4.333
18-Sep-17	14:24.0	30.444	42.7	0	0.1261	0.5	5.54	124.9	4.303
30-Aug-17	14:24.0	28.468	30.1	0	0.1261	0.5	5.03	161.5	4.333
6-Sep-17	14:24.0	15.557	81.2	0	0.1261	0	0	123.5	4.2
6-Sep-17	14:24.0	16.915	74.3	0	0.1261	0	0	130.6	4.2
14-Sep-17	14:24.0	33.73	20.6	0	0.1261	0	0	30.9	4.303
14-Sep-17	14:24.0	34.677	20.3	0	0.1261	0	0	50.5	4.339
14-Sep-17	14:24.0	30.545	26.9	0	0.1261	0	3.52	127.8	4.267
14-Sep-17	14:24.0	27.949	32.3	0	0.1261	0	1.01	122.1	4.249
14-Sep-17	14:24.0	27.21	34.3	0	0.1261	0	0.5	126.4	4.224
14-Sep-17	14:24.0	26.916	33.3	0	0.1261	0	0	133.4	4.212
14-Sep-17	14:24.0	26.646	33.8	0	0.1261	0	0	134.8	4.206
13-Sep-17	14:24.0	17.153	69.7	0	0.1261	0	0	136.2	4.2
14-Sep-17	14:24.0	21.032	45	0	0.1261	0	0	109.5	4.206
14-Sep-17	14:24.0	18.818	53.7	0	0.1261	0	1.01	134.8	4.2
6-Sep-17	14:24.0	15.27	84.5	0	0.1261	0	0.5	122.1	4.2
6-Sep-17	14:24.0	30.976	27.9	0	0.1261	0	0	36.5	4.321
6-Sep-17	14:24.0	31.179	27.9	0	0.1261	0	0	15.4	4.381
15-Sep-17	14:24.0	32.175	27.2	0	0.1261	0	0.5	129.2	4.375
16-Sep-17	14:24.0	32.098	35.2	0	0.1261	0.5	3.52	109.5	4.339
7-Sep-17	14:24.0	17.629	68	0	0.1261	0	0.5	122.1	4.206
16-Sep-17	14:24.0	19.127	85.1	0	0.1261	0	0	136.2	4.2
16-Sep-17	14:24.0	19.841	79.4	0	0.1261	0	0	132	4.2
7-Sep-17	14:24.0	17.796	72.6	0	0.1261	0	0.5	120.7	4.2
15-Sep-17	14:24.0	32.536	22.6	0	0.1261	1.51	6.54	126.4	4.315
14-Sep-17	14:24.0	25.38	35.7	0	0.1261	0	0	140.4	4.206
12-Sep-17	14:24.0	21.7	46.1	0	0.1261	0	4.03	137.6	4.206
11-Sep-17	14:24.0	21.628	80.7	0	0.1261	0	0	77.2	4.351
11-Sep-17	14:24.0	25.525	59.3	0	0.1261	0	4.03	57.6	4.4
11-Sep-17	14:24.0	22.034	44.7	0	0.1261	0	1.01	134.8	4.212
11-Sep-17	14:24.0	20.889	48.6	0	0.1261	0	0	134.8	4.206
12-Sep-17	14:24.0	20.222	55.8	0	0.1261	0	0	134.8	4.206
17-Sep-17	14:24.0	34.969	15	0	0.1261	1.51	5.54	28.1	4.303
17-Sep-17	14:24.0	20.174	50.8	0	0.1261	0	0	143.2	4.2
17-Sep-17	14:24.0	19.222	52.8	0	0.1261	0	0	140.4	4.206
3-Sep-17	14:24.0	23.954	49.8	0	0.1261	0	5.03	124.9	4.297
12-Sep-17	14:24.0	32.691	30.9	0	0.1261	0	0	102.5	4.357
12-Sep-17	14:24.0	32.098	30.3	0	0.1261	0.5	5.03	115.1	4.333
5-Sep-17	14:24.0	27.481	35.3	0	0.1261	0.5	4.53	102.5	4.363
13-Sep-17	14:24.0	19.912	55.8	0	0.1261	0	0	136.2	4.206
13-Sep-17	14:24.0	19.294	62.7	0	0.1261	0	0	136.2	4.2
19-Sep-17	14:24.0	30.621	48.9	0	0.1261	0	0	110.9	4.351
3-Sep-17	14:24.0	21.915	53.6	0	0.1261	0	0	134.8	4.249
9-Sep-17	14:24.0	32.047	30.9	0	0.1261	1.01	4.53	126.4	4.333
13-Sep-17	14:24.0	32.898	27.1	0	0.1261	0	2.01	63.2	4.345
13-Sep-17	14:24.0	33.261	25.4	0	0.1261	0	0	43.5	4.375
13-Sep-17	14:24.0	24.871	36.9	0	0.1261	0	1.01	139	4.206
13-Sep-17	14:24.0	23.136	39.6	0	0.1261	0	1.01	139	4.206
17-Sep-17	14:24.0	36.579	12.8	0	0.1261	1.51	5.03	50.5	4.339
12-Sep-17	14:24.0	33.131	29.9	0	0.1261	0	6.04	120.7	4.345
23-Sep-17	14:24.0	27.21	20	0	0.1261	0	0	139	4.218
22-Sep-17	14:24.0	25.939	52.2	0	0.1261	0	2.52	133.4	4.249
22-Sep-17	14:24.0	24.726	54.9	0	0.1261	0	0	133.4	4.224
22-Sep-17	14:24.0	24.291	57.3	0	0.1261	0	0	134.8	4.218
22-Sep-17	14:24.0	23.208	61.1	0	0.1261	0	0	133.4	4.212
22-Sep-17	14:24.0	23.328	62.6	0	0.1261	0	0	136.2	4.206
27-Aug-17	14:24.0	28.345	34	0	0.1261	0	0	127.8	4.321
27-Aug-17	14:24.0	28.394	35	0	0.1261	0	0	132	4.345
23-Sep-17	14:24.0	35.529	17	0	0.1261	0.5	6.04	132	4.333
27-Aug-17	14:24.0	16.915	85.2	0	0.1261	0	0	148.8	4.2
27-Sep-17	14:24.0	32.047	33.5	0	0.1261	0	3.02	120.7	4.218
22-Sep-17	14:24.0	27.776	46.9	0	0.1261	0	0	133.4	4.291
28-Aug-17	14:24.0	23.833	52.3	0	0.1261	0	0	120.7	4.393
23-Sep-17	14:24.0	25.623	54.4	0	0.1261	0.5	5.03	126.4	4.206
20-Sep-17	14:24.0	24.436	66.9	0	0.1261	1.01	5.03	134.8	4.206
1-Sep-17	14:24.0	21.509	55.7	0	0.1261	0	0	133.4	4.212
1-Sep-17	14:24.0	22.178	54.3	0	0.1261	0	0	133.4	4.218
20-Sep-17	14:24.0	32.536	47.2	0	0.1261	1.01	4.53	109.5	4.321
20-Sep-17	14:24.0	32.433	47.3	0	0.1261	0	3.52	96.9	4.363
20-Sep-17	14:24.0	28.419	61.4	0	0.1261	0	3.02	112.3	4.351
27-Aug-17	14:24.0	27.998	40.9	0	0.1261	0	0	136.2	4.357
21-Sep-17	14:24.0	26.842	62.7	0	0.1261	1.01	5.03	147.4	4.357
21-Sep-17	14:24.0	21.509	85.6	0	0.1261	0	0	133.4	4.188
21-Sep-17	14:24.0	21.748	84.9	0	0.1261	0	0	133.4	4.194
21-Sep-17	14:24.0	21.915	84.5	0	0.1261	0	0	134.8	4.2
21-Sep-17	14:24.0	22.25	83.2	0	0.1261	0	0	132	4.2
28-Aug-17	14:24.0	26.085	45.7	0	0.1261	0	0	133.4	4.333
28-Aug-17	14:24.0	23.424	49.8	0	0.1261	0	0	123.5	4.315
27-Aug-17	14:24.0	20.627	70.7	0	0.1261	0	0	130.6	4.218
28-Aug-17	14:24.0	19.984	62.1	0	0.1261	0	0	130.6	4.224
29-Aug-17	14:24.0	19.199	48.8	0	0.1261	0	0.5	132	4.237
28-Aug-17	14:24.0	18.2	70.9	0	0.1261	0	0	132	4.212
27-Aug-17	14:24.0	27.702	35.9	0	0.1261	0	0	127.8	4.381
21-Sep-17	14:24.0	29.665	53.4	0	0.1261	1.51	5.03	143.2	4.351
21-Sep-17	14:24.0	29.49	52.3	0	0.1261	0.5	6.04	144.6	4.321
21-Sep-17	14:24.0	28.692	51	0	0.1261	0	0	134.8	4.345
21-Sep-17	14:24.0	27.014	51.2	0	0.1261	0	0	136.2	4.285
21-Sep-17	14:24.0	25.914	53.6	0	0.1261	0	0	139	4.249
21-Sep-17	14:24.0	24.798	57.2	0	0.1261	0	0	154.4	4.218
21-Sep-17	14:24.0	23.352	66.7	0	0.1261	0	0	133.4	4.206
29-Aug-17	14:24.0	25.987	41.2	0	0.1261	0	0	127.8	4.333
23-Sep-17	14:24.0	23.497	66.7	0	0.1261	0.5	5.54	127.8	4.206
28-Aug-17	14:24.0	18.985	67.2	0	0.1261	0	0	130.6	4.218
8-Sep-17	14:24.0	33.678	29.5	0	0.1261	1.01	5.03	94.1	4.357
20-Sep-17	14:24.0	21.843	78	0	0.1261	0	0	133.4	4.2
24-Sep-17	14:24.0	29.64	39.4	0	0.1261	0	0	139	4.345
1-Sep-17	14:24.0	31.103	32.4	0	0.1261	0	3.02	228.8	4.345
24-Sep-17	14:24.0	24.171	58.1	0	0.1261	0	0	146	4.243
31-Aug-17	14:24.0	26.256	29	0	0.1261	1.51	5.54	140.4	4.369
20-Sep-17	14:24.0	21.056	82.5	0	0.1261	0	0	130.6	4.2
8-Sep-17	14:24.0	31.765	33.8	0	0.1261	1.51	5.03	40.7	4.315
24-Sep-17	14:24.0	24.919	46.7	0	0.1261	0	3.02	134.8	4.249
30-Aug-17	14:24.0	27.382	31.8	0	0.1261	0.5	3.52	150.2	4.363
31-Aug-17	14:24.0	21.748	46.7	0	0.1261	0	2.01	133.4	4.237
23-Sep-17	14:24.0	27.653	37.9	0	0.1261	0	0	132	4.206
9-Sep-17	14:24.0	21.127	53.9	0	0.1261	0	0	136.2	4.206
31-Aug-17	14:24.0	22.513	42	0	0.1261	0.5	4.03	139	4.255
31-Aug-17	14:24.0	24.388	36.9	0	0.1261	1.01	5.54	129.2	4.315
7-Sep-17	14:24.0	30.672	32.1	0	0.1261	0.5	4.03	85.6	4.333
8-Sep-17	14:24.0	21.939	57.8	0	0.1261	0	1.01	140.4	4.2
30-Aug-17	14:24.0	18.723	49.1	0	0.1261	0	0	130.6	4.218
1-Sep-17	14:24.0	30.041	31.8	0	0.1261	0	3.02	193.7	4.339
27-Aug-17	14:24.0	18.414	76	0	0.1261	0	0	133.4	4.206
30-Aug-17	14:24.0	17.629	52.6	0	0.1261	0	0	130.6	4.224
1-Sep-17	14:24.0	23.04	47.7	0	0.1261	0	1.01	123.5	4.224
7-Sep-17	14:24.0	24.605	47.6	0	0.1261	0	2.01	123.5	4.206
30-Aug-17	14:24.0	21.342	42.7	0	0.1261	0	1.51	130.6	4.255
1-Sep-17	14:24.0	24.195	39.6	0	0.1261	0	0	123.5	4.249
8-Sep-17	14:24.0	20.436	64.3	0	0.1261	0	0.5	140.4	4.2
30-Aug-17	14:24.0	25.089	34.2	0	0.1261	0	3.02	136.2	4.315
31-Aug-17	14:24.0	21.032	49.6	0	0.1261	0.5	4.03	129.2	4.224
9-Sep-17	14:24.0	17.819	63	0	0.1261	0	0	140.4	4.2
19-Mar-18	49:17.0	31.868	58.6	0	0.1266	0	1.01	227.4	4.393
20-Nov-18	14:24.0	21.413	78.9	0	0.1266	0	0	18.3	4.152
20-Nov-18	14:24.0	28.99	56	0	0.1266	0	0	40.7	4.2
20-Nov-18	14:24.0	30.849	47.5	0	0.1266	0	0	63.2	4.279
20-Nov-18	14:24.0	32.794	41.9	0	0.1266	0	0	89.9	4.321
19-Mar-18	49:17.0	33.861	50.8	0	0.1266	0	1.51	139	4.345
19-Nov-18	14:24.0	22.274	87.5	0	0.1266	0	0	124.9	4.152
20-Mar-18	49:17.0	25.963	76.9	0	0.1266	0	0	155.8	4.164
20-Mar-18	49:17.0	27.136	72.5	0	0.1266	0	1.51	157.2	4.17
20-Mar-18	49:17.0	31.052	56	0	0.1266	0	1.01	102.5	4.206
20-Mar-18	49:17.0	32.898	52.1	0	0.1266	0	1.51	132	4.237
19-Mar-18	49:17.0	22.417	89.7	0	0.1266	0	0	210.6	4.152
19-Mar-18	49:17.0	28.221	78.8	0	0.1266	0	1.01	91.3	4.351
19-Mar-18	49:17.0	22.729	88.6	0	0.1266	0	0	210.6	4.158
19-Mar-18	49:17.0	23.569	94.5	0	0.1266	0	0	68.8	4.267
19-Mar-18	49:17.0	29.84	66.9	0	0.1266	0	0.5	103.9	4.339
28-Aug-17	14:24.0	21.342	55.1	0	0.1266	0	0	133.4	4.237
28-Aug-17	14:24.0	22.082	52.3	0	0.1266	0	0	130.6	4.255
15-Sep-17	14:24.0	22.369	60.5	0	0.1266	0.5	6.04	134.8	4.206
16-Sep-17	14:24.0	21.008	69.9	0	0.1266	0	0	129.2	4.206
15-Sep-17	14:24.0	30.545	24.1	0	0.1266	0	5.03	127.8	4.321
15-Sep-17	14:24.0	25.525	35.5	0	0.1266	0	0	154.4	4.212
28-Aug-17	14:24.0	24.46	49	0	0.1266	0	0	133.4	4.333
12-Sep-17	14:24.0	23.761	41.1	0	0.1266	0	1.01	143.2	4.206
12-Sep-17	14:24.0	26.72	33.7	0	0.1266	0	0.5	129.2	4.237
12-Sep-17	14:24.0	31.714	29.8	0	0.1266	0.5	3.52	117.9	4.327
15-Sep-17	14:24.0	31.714	23.8	0	0.1266	1.51	6.04	130.6	4.375
28-Aug-17	14:24.0	24.074	48.7	0	0.1266	0	0	124.9	4.333
16-Sep-17	14:24.0	31.255	39.3	0	0.1266	0.5	3.52	94.1	4.333
15-Sep-17	14:24.0	28.468	30.9	0	0.1266	0	4.53	127.8	4.279
14-Sep-17	14:24.0	32.975	23.1	0	0.1266	0	4.03	108.1	4.315
14-Sep-17	14:24.0	34.387	20.1	0	0.1266	0	0	57.6	4.339
14-Sep-17	14:24.0	34.413	20.3	0	0.1266	0	0	89.9	4.303
6-Sep-17	14:24.0	18.818	56.3	0	0.1266	0	0	126.4	4.206
5-Sep-17	14:24.0	15.939	60	0	0.1266	0	0	124.9	4.212
16-Sep-17	14:24.0	31.51	36.4	0	0.1266	1.01	4.03	139	4.321
16-Sep-17	14:24.0	32.407	36.1	0	0.1266	1.01	4.53	139	4.345
6-Sep-17	14:24.0	30.545	28.4	0	0.1266	0	0	47.7	4.345
5-Sep-17	14:24.0	27.505	35.5	0	0.1266	0.5	4.03	106.7	4.351
7-Sep-17	14:24.0	20.388	58.6	0	0.1266	0	1.01	133.4	4.206
13-Sep-17	14:24.0	25.963	39.6	0	0.1266	0	1.01	137.6	4.224
13-Sep-17	14:24.0	32.304	26.9	0	0.1266	0	0	19.7	4.321
6-Sep-17	14:24.0	26.036	42.2	0	0.1266	0	2.01	115.1	4.249
13-Sep-17	14:24.0	33.495	26.7	0	0.1266	0	0	40.7	4.309
5-Sep-17	14:24.0	24.823	39.3	0	0.1266	0	3.02	132	4.297
18-Sep-17	14:24.0	22.154	61.9	0	0.1266	0	0	134.8	4.2
8-Sep-17	14:24.0	22.944	51.6	0	0.1266	0	2.01	134.8	4.206
26-Aug-17	14:24.0	21.056	57.1	0	0.1266	0	0	127.8	4.218
26-Aug-17	14:24.0	19.484	69.9	0	0.1266	0	0	126.4	4.212
24-Aug-17	14:24.0	19.103	65.4	0	0.1266	0	3.52	153	4.2
24-Aug-17	14:24.0	19.222	57	0	0.1266	0	1.01	157.2	4.206
24-Aug-17	14:24.0	21.7	45.8	0	0.1266	0	0	136.2	4.206
20-Sep-17	14:24.0	32.458	45.7	0	0.1266	0.5	4.03	109.5	4.393
10-Sep-17	14:24.0	24.098	49	0	0.1266	0	0	123.5	4.218
7-Sep-17	14:24.0	30.976	32.4	0	0.1266	0	3.52	112.3	4.339
20-Sep-17	14:24.0	22.274	75.4	0	0.1266	0	0	136.2	4.2
17-Sep-17	14:24.0	26.916	42.7	0	0.1266	0.5	6.04	127.8	4.206
17-Sep-17	14:24.0	28.617	32.3	0	0.1266	0.5	4.53	123.5	4.212
20-Sep-17	14:24.0	28.369	52.6	0	0.1266	0	0	133.4	4.237
21-Sep-17	14:24.0	22.489	81.6	0	0.1266	0	0	130.6	4.2
17-Sep-17	14:24.0	28.171	25.2	0	0.1266	0	1.01	129.2	4.224
[truncated: 19,253 more rows]
