# Supplementary material for: Incidence of clinical malaria, acute respiratory illness, and diarrhoea in children in southern Malawi: a prospective cohort study
Source: Malar J. 2021 Dec 20;20:473. doi: 10.1186/s12936-021-04013-5 (PMC8685799; doi:10.1186/s12936-021-04013-5)
Supplement: Supplementary file 7 — Additional file 7. Appendix 7: MMP focal area B weather data. [file 12936_2021_4013_MOESM7_ESM.csv]

Date	Time	TempC	RH	Rainmm	WaterContentmm	WindSpeedms	GustSpeedms	WindDirectionø	BattVc5
1-Jan-17	49:17.0	27.235	74.8	0	0.1416	0	0	158.6	4.224
1-Jan-17	49:17.0	25.525	80.7	0	0.1412	0	0	158.6	4.218
1-Jan-17	49:17.0	25.089	84	0	0.1396	0	0	158.6	4.212
1-Jan-17	49:17.0	24.774	91.2	0	0.157	0	0	341.2	4.224
1-Jan-17	49:17.0	24.919	91.5	0	0.1577	0	0	341.2	4.218
1-Jan-17	49:17.0	24.436	92.6	0	0.1581	0	0	341.2	4.212
1-Jan-17	49:17.0	24.098	94	0	0.1585	0	0	341.2	4.212
1-Jan-17	49:17.0	24.532	94.6	0	0.159	0	0	341.2	4.206
1-Jan-17	49:17.0	26.329	91.6	0	0.159	0	0	339.7	4.237
1-Jan-17	49:17.0	27.801	85.6	0	0.1577	0	0.5	339.7	4.315
1-Jan-17	49:17.0	28.048	72.4	0	0.1421	0	0	158.6	4.231
1-Jan-17	49:17.0	26.622	76.1	0	0.1412	0	0	158.6	4.224
1-Jan-17	49:17.0	32.898	65.8	0	0.1532	0	1.51	153	4.345
1-Jan-17	49:17.0	36.389	54.8	0	0.1499	0	2.01	153	4.345
1-Jan-17	49:17.0	36.987	52	0	0.149	0	3.02	160	4.333
1-Jan-17	49:17.0	38.254	48.1	0	0.1466	0	3.02	143.2	4.339
1-Jan-17	49:17.0	37.233	47.7	0	0.1459	0	2.52	151.6	4.327
1-Jan-17	49:17.0	37.866	43.5	0	0.1455	0	3.52	150.2	4.369
1-Jan-17	49:17.0	36.362	42.2	0	0.1446	0	2.52	165.7	4.363
1-Jan-17	49:17.0	34.889	47.6	0	0.1441	0	4.03	165.7	4.333
1-Jan-17	49:17.0	29.615	66.6	0	0.1425	0	0	158.6	4.237
1-Jan-17	49:17.0	33.704	49.6	0	0.1434	0	2.01	176.9	4.291
1-Jan-17	49:17.0	31.052	59.1	0	0.143	0	1.01	160	4.255
1-Jan-17	49:17.0	29.615	78.3	0	0.1558	0	1.51	181.1	4.351
2-Jan-17	49:17.0	24.677	87.8	0	0.1396	0	0	158.6	4.206
2-Jan-17	49:17.0	31.331	84.4	1.8	0.1302	0	0.5	2.8	4.339
2-Jan-17	49:17.0	30.9	70.3	0	0.1361	0	2.01	280.8	4.351
2-Jan-17	49:17.0	24.436	86.5	0	0.1331	0	1.51	335.5	4.237
2-Jan-17	49:17.0	23.905	90.4	0	0.1331	0	1.51	4.2	4.231
2-Jan-17	49:17.0	23.761	93.1	0.4	0.1271	0	0	168.5	4.224
2-Jan-17	49:17.0	24.726	83.5	0	0.1335	0	3.02	18.3	4.249
2-Jan-17	49:17.0	29.215	73.3	0	0.1342	0	2.01	147.4	4.255
2-Jan-17	49:17.0	27.825	69.6	0	0.1347	0	1.01	308.9	4.273
2-Jan-17	49:17.0	31.459	62.8	0	0.1352	0	1.51	161.5	4.309
2-Jan-17	49:17.0	24.026	92	0	0.1387	0	0	158.6	4.206
2-Jan-17	49:17.0	24.363	89.6	0	0.1391	0	0	158.6	4.206
2-Jan-17	49:17.0	23.905	91.8	0	0.1387	0	0	158.6	4.206
2-Jan-17	49:17.0	31.689	61.8	0	0.1335	0	1.51	133.4	4.309
2-Jan-17	49:17.0	41.123	35.4	0	0.1335	0	2.01	331.3	4.375
2-Jan-17	49:17.0	37.728	46.4	0	0.1347	0	4.03	329.9	4.351
2-Jan-17	49:17.0	38.337	45.4	0	0.1342	0	2.01	157.2	4.333
2-Jan-17	49:17.0	33.521	60.6	0	0.1352	0	2.01	306.1	4.357
2-Jan-17	49:17.0	27.53	80.8	0	0.137	0	1.01	179.7	4.231
2-Jan-17	49:17.0	26.207	84.8	0	0.1382	0	0	158.6	4.206
2-Jan-17	49:17.0	24.363	91.4	0	0.1382	0	0	158.6	4.2
2-Jan-17	49:17.0	23.665	94.5	0.4	0.1246	0	0	168.5	4.224
2-Jan-17	49:17.0	32.355	74.1	0	0.1352	0	0	5.6	4.345
2-Jan-17	49:17.0	35.797	54.9	0	0.1347	0	2.01	193.7	4.351
3-Jan-17	49:17.0	29.315	64.5		0.1312	0.5	4.03	355.2	4.291
3-Jan-17	49:17.0	23.497	96	0.2	0.1219	0	0	168.5	4.212
3-Jan-17	49:17.0	23.617	96.4	0	0.1219	0	0	168.5	4.206
3-Jan-17	49:17.0	23.376	96.9	0	0.1219	0	0	168.5	4.206
3-Jan-17	49:17.0	23.472	97.1	0	0.1219	0	0	168.5	4.206
3-Jan-17	49:17.0	24.363	97.3	0	0.1224	0	0	168.5	4.243
3-Jan-17	49:17.0	25.744	94.6	0	0.1276	0	0	168.5	4.351
3-Jan-17	49:17.0	32.304	67.5	0	0.1297	0	1.51	324.3	4.351
3-Jan-17	49:17.0	33.887	53.5	0	0.1297	0	2.52	334.1	4.345
3-Jan-17	49:17.0	33.757	56.8	0	0.1297	0	2.01	355.2	4.351
3-Jan-17	49:17.0	23.545	95.5	0.2	0.1224	0	0.5	168.5	4.218
3-Jan-17	49:17.0	36.769	45.9	0	0.1302	0	2.52	2.8	4.321
3-Jan-17	49:17.0	24.871	96.8	0.2	0.1229	0	0	168.5	4.315
3-Jan-17	49:17.0	30.495	66	0	0.1312	0	2.01	317.3	4.309
3-Jan-17	49:17.0	30.773	62.6	0	0.1302	0	2.01	308.9	4.321
3-Jan-17	49:17.0	28.791	70.4	0	0.1297	0	0	294.8	4.279
3-Jan-17	49:17.0	27.505	77.3	0	0.1297	0	0	294.8	4.261
3-Jan-17	49:17.0	27.456	79.6	0	0.1285	0	0	294.8	4.249
3-Jan-17	49:17.0	27.554	80.9	0	0.1281	0	0.5	303.2	4.237
3-Jan-17	49:17.0	26.573	85.5	0	0.1281	0	0.5	314.5	4.231
3-Jan-17	49:17.0	26.28	89.4	0	0.1276	0	0	314.5	4.224
3-Jan-17	49:17.0	26.451	85	0	0.1266	0	1.51	210.6	4.218
3-Jan-17	49:17.0	36.769	47	0	0.1302	0	2.52	320.1	4.375
3-Jan-17	49:17.0	27.899	84.2	0	0.1307	0	0.5	162.9	4.351
4-Jan-17	49:17.0	35.636	53.5	0	0.1237	0	1.51	189.5	4.351
4-Jan-17	49:17.0	25.72	84.6	0	0.1266	0	1.51	179.7	4.218
4-Jan-17	49:17.0	23.424	96.6	0	0.1143	0	0	54.8	4.224
4-Jan-17	49:17.0	25.55	85.5	0	0.1256	0	0	175.5	4.212
4-Jan-17	49:17.0	25.162	86.9	0	0.1256	0	0	175.5	4.206
4-Jan-17	49:17.0	24.944	89.4	0	0.1251	0	0	175.5	4.206
4-Jan-17	49:17.0	25.089	90.7	0	0.1251	0	0	175.5	4.206
4-Jan-17	49:17.0	27.21	84.5	0	0.1246	0	0.5	171.3	4.273
4-Jan-17	49:17.0	27.677	82.3	0	0.1246	0	1.51	169.9	4.339
4-Jan-17	49:17.0	28.493	77.2	0	0.1242	0	0.5	176.9	4.339
4-Jan-17	49:17.0	28.941	80.1	0	0.1242	0	1.01	137.6	4.357
4-Jan-17	49:17.0	23.497	90.6	0.6	0.1214	0	1.01	60.4	4.249
4-Jan-17	49:17.0	35.555	53.6	0	0.1229	0	2.52	160	4.345
4-Jan-17	49:17.0	32.047	54.3	0	0.1246	0	1.51	25.3	4.345
4-Jan-17	49:17.0	27.259	71.3	0	0.1256	0	2.52	329.9	4.315
4-Jan-17	49:17.0	27.579	75.8	0	0.1246	0	3.02	355.2	4.333
4-Jan-17	49:17.0	27.284	77.8	0	0.1246	0	2.01	336.9	4.303
4-Jan-17	49:17.0	26.061	82.1	0	0.1237	0	2.01	116.5	4.273
4-Jan-17	49:17.0	24.919	82.7	0	0.1237	0	3.02	141.8	4.261
4-Jan-17	49:17.0	23.256	93.4	0.6	0.1174	0	0	54.8	4.249
4-Jan-17	49:17.0	23.352	94.8	0.2	0.1164	0	0	54.8	4.237
4-Jan-17	49:17.0	23.112	95.3	0	0.1148	0	0	54.8	4.231
4-Jan-17	49:17.0	23.256	96.2	0	0.1148	0	0	54.8	4.224
4-Jan-17	49:17.0	32.898	64.6	0	0.1242	0	1.51	126.4	4.327
5-Jan-17	49:17.0	24.968	88.6	0	0.1189	0	1.01	314.5	4.249
5-Jan-17	49:17.0	23.448	93.4	0	0.1179	0	0	285	4.218
5-Jan-17	49:17.0	31.97	64.1	0	0.1189	0	1.51	203.6	4.351
5-Jan-17	49:17.0	23.617	97.3	0	0.1143	0	0	54.8	4.212
5-Jan-17	49:17.0	23.689	97.6	0	0.1143	0	0	54.8	4.206
5-Jan-17	49:17.0	23.689	97.8	0	0.1138	0	0	54.8	4.206
5-Jan-17	49:17.0	24.339	97.8	0.2	0.1143	0	0	54.8	4.224
5-Jan-17	49:17.0	24.919	97.5	0	0.1159	0	0	54.8	4.249
5-Jan-17	49:17.0	25.283	95.7	0	0.1184	0	0	54.8	4.297
5-Jan-17	49:17.0	23.713	97	0	0.1143	0	0	54.8	4.218
5-Jan-17	49:17.0	28.27	86.8	0	0.1199	0	0.5	36.5	4.345
5-Jan-17	49:17.0	24.171	90.4	0	0.1184	0	1.01	299	4.231
5-Jan-17	49:17.0	33.626	65.1	0	0.1189	0	1.51	181.1	4.321
5-Jan-17	49:17.0	23.954	92.8	0	0.1174	0	0	285	4.224
5-Jan-17	49:17.0	32.098	65.4	0	0.1199	0	1.51	182.5	4.369
5-Jan-17	49:17.0	36.688	49.2	0	0.1194	0	1.51	164.3	4.357
5-Jan-17	49:17.0	27.186	75.6	0	0.1199	0.5	4.03	11.2	4.321
5-Jan-17	49:17.0	26.5	79.5	0	0.1209	0	2.52	36.5	4.291
5-Jan-17	49:17.0	25.234	86.9	0	0.1194	0	0.5	12.6	4.267
5-Jan-17	49:17.0	24.847	89.6	0	0.1189	0	1.01	332.7	4.255
5-Jan-17	49:17.0	24.968	88.3	0	0.1184	0	1.01	352.4	4.237
5-Jan-17	49:17.0	24.074	91.4	0	0.1179	0	0	285	4.224
5-Jan-17	49:17.0	29.941	78.7	0	0.1194	0	1.01	29.5	4.339
5-Jan-17	49:17.0	23.641	97.5	0	0.1148	0	0	54.8	4.206
6-Jan-17	49:17.0	38.254	41.3	0	0.1184	0	2.52	150.2	4.387
6-Jan-17	49:17.0	22.872	95.4	0	0.1169	0	0	285	4.212
6-Jan-17	49:17.0	22.705	95.8	0	0.1164	0	0	285	4.206
6-Jan-17	49:17.0	22.489	96.3	0	0.1164	0	0	285	4.206
6-Jan-17	49:17.0	22.872	96.7	0	0.1164	0	0	285	4.2
6-Jan-17	49:17.0	25.453	93.8	0	0.1164	0	1.01	294.8	4.2
6-Jan-17	49:17.0	28.196	82.1	0	0.1164	0	1.51	314.5	4.303
6-Jan-17	49:17.0	30.52	71.4	0	0.1159	0	1.51	290.6	4.369
6-Jan-17	49:17.0	34.176	56.5	0	0.1159	0	2.01	327.1	4.375
6-Jan-17	49:17.0	36.715	45	0	0.1153	0	1.51	262.5	4.363
6-Jan-17	49:17.0	23.088	94.7	0	0.1174	0	0	285	4.212
6-Jan-17	49:17.0	39.658	38.8	0	0.1159	0	3.02	122.1	4.339
6-Jan-17	49:17.0	37.976	40.8	0	0.1169	0	2.01	143.2	4.333
6-Jan-17	49:17.0	34.281	53.4	0	0.1194	0	1.51	300.4	4.297
6-Jan-17	49:17.0	32.613	58.3	0	0.1194	0	0.5	332.7	4.249
6-Jan-17	49:17.0	31.026	59.3	0	0.1194	0	0.5	336.9	4.224
6-Jan-17	49:17.0	30.066	62.2	0	0.1189	0	1.51	329.9	4.224
6-Jan-17	49:17.0	28.419	68.7	0	0.1184	0	2.01	325.7	4.218
6-Jan-17	49:17.0	25.574	82.2	0	0.1179	0	3.02	353.8	4.212
6-Jan-17	49:17.0	23.809	90	0.4	0.1101	0	2.01	12.6	4.212
6-Jan-17	49:17.0	23.665	91.8	0	0.1096	0	1.51	324.3	4.206
6-Jan-17	49:17.0	23.978	91.8	0	0.1107	0	1.01	0	4.206
6-Jan-17	49:17.0	38.784	40.7	0	0.1159	0	2.01	310.3	4.345
6-Jan-17	49:17.0	37.755	44.8	0	0.1184	0	2.52	195.1	4.321
7-Jan-17	49:17.0	23.809	94.7	0	0.1091	0	0	0	4.2
7-Jan-17	49:17.0	25.137	96.2	0	0.1096	0	0	0	4.2
7-Jan-17	49:17.0	27.358	90.1	0	0.1128	0	0.5	344	4.206
7-Jan-17	49:17.0	31.433	73.5	0	0.1133	0	1.01	314.5	4.363
7-Jan-17	49:17.0	33.183	59.9	0	0.1133	0	1.01	320.1	4.363
7-Jan-17	49:17.0	36.092	50.7	0	0.1133	0	1.51	351	4.357
7-Jan-17	49:17.0	37.811	45.8	0	0.1138	0	2.52	2.8	4.363
7-Jan-17	49:17.0	40.257	40.5	0	0.1138	0	3.02	342.6	4.369
7-Jan-17	49:17.0	23.905	96	0	0.1091	0	0	0	4.2
7-Jan-17	49:17.0	23.881	95.5	0.2	0.1091	0	0	0	4.2
7-Jan-17	49:17.0	24.002	96.4	0	0.1091	0	0	0	4.2
7-Jan-17	49:17.0	35.636	49.1	0	0.1153	0	1.51	331.3	4.333
7-Jan-17	49:17.0	27.481	87.7	0	0.1184	0	0	61.8	4.249
7-Jan-17	49:17.0	39.772	41.6	0	0.1153	0	2.52	144.6	4.339
7-Jan-17	49:17.0	25.963	91.1	0	0.1174	0	0	61.8	4.218
7-Jan-17	49:17.0	26.28	91.6	0	0.1174	0	0	61.8	4.224
7-Jan-17	49:17.0	26.72	91	0	0.1179	0	0	61.8	4.224
7-Jan-17	49:17.0	26.94	87.8	0	0.1189	0	0	61.8	4.231
7-Jan-17	49:17.0	27.431	85.6	0	0.1189	0	0	61.8	4.243
7-Jan-17	49:17.0	28.245	68.6	3.2	0.1042	0	3.02	57.6	4.291
7-Jan-17	49:17.0	28.245	90.9	2.6	0.1117	0	2.01	64.6	4.321
7-Jan-17	49:17.0	28.791	90	0	0.1164	0	0	63.2	4.297
7-Jan-17	49:17.0	28.023	87.7	0	0.1179	0	0	63.2	4.267
7-Jan-17	49:17.0	23.833	93.6	0.2	0.1091	0	0	0	4.2
8-Jan-17	49:17.0	25.623	84.9	0	0.1164	0	0	328.5	4.212
8-Jan-17	49:17.0	27.702	80.5	0	0.1179	0	2.01	196.5	4.224
8-Jan-17	49:17.0	26.304	81.6	0	0.1169	0	1.01	324.3	4.218
8-Jan-17	49:17.0	25.258	87.7	0	0.1164	0	0	325.7	4.206
8-Jan-17	49:17.0	25.404	87.4	0	0.1164	0	0	325.7	4.206
8-Jan-17	49:17.0	26.549	81.7	0	0.1174	0	3.02	335.5	4.224
8-Jan-17	49:17.0	26.793	84.7	0	0.1164	0	0	61.8	4.249
8-Jan-17	49:17.0	26.28	90.5	0	0.1169	0	0	61.8	4.212
8-Jan-17	49:17.0	25.744	91	0	0.1174	0	0	61.8	4.206
8-Jan-17	49:17.0	25.525	92.9	0	0.1169	0	0	61.8	4.206
8-Jan-17	49:17.0	33.079	55.1	0	0.1189	0	1.51	154.4	4.309
8-Jan-17	49:17.0	25.453	95.1	0	0.1164	0	0	61.8	4.2
8-Jan-17	49:17.0	35.182	50.5	0	0.1174	0	2.01	42.1	4.345
8-Jan-17	49:17.0	31.663	59.3	0	0.1189	0	0.5	183.9	4.273
8-Jan-17	49:17.0	27.751	79.4	0	0.1169	0	0	61.8	4.357
8-Jan-17	49:17.0	29.14	74.2	0	0.1164	0	0	133.4	4.363
8-Jan-17	49:17.0	33.157	57.9	0	0.1174	0	2.01	160	4.333
8-Jan-17	49:17.0	31.791	66.2	0	0.1164	0	0	178.3	4.345
8-Jan-17	49:17.0	30.469	65.8	0	0.1189	0	0	183.9	4.249
8-Jan-17	49:17.0	34.545	57.3	0	0.1159	0	0	179.7	4.333
8-Jan-17	49:17.0	29.34	72	0	0.1179	0	0	183.9	4.237
8-Jan-17	49:17.0	33.783	59.2	0	0.1164	0	1.51	171.3	4.339
8-Jan-17	49:17.0	30.091	71	0	0.1164	0	0	176.9	4.351
8-Jan-17	49:17.0	25.331	94.4	0	0.1164	0	0	61.8	4.206
9-Jan-17	49:17.0	24.774	94.3	1.2	0.3622	0	0.5	56.2	4.285
9-Jan-17	49:17.0	24.243	95.2	0	0.3403	0	1.01	77.2	4.267
9-Jan-17	49:17.0	24.412	95.6	0	0.3286	0	1.01	164.3	4.255
9-Jan-17	49:17.0	24.339	96.4	0	0.3133	0	0	157.2	4.237
9-Jan-17	49:17.0	24.002	97.2	0	0.3033	0	0	157.2	4.224
9-Jan-17	49:17.0	24.098	97.5	0	0.2997	0	0	157.2	4.224
9-Jan-17	49:17.0	24.05	97.9	0	0.297	0	0	157.2	4.218
9-Jan-17	49:17.0	23.978	98.5	0	0.2925	0	0	157.2	4.206
9-Jan-17	49:17.0	24.557	95.9	0	0.3199	0	0	157.2	4.249
9-Jan-17	49:17.0	23.93	91.6	7.2	0.1677	0	3.02	43.5	4.285
9-Jan-17	49:17.0	24.146	98.3	0	0.2949	0	0	157.2	4.212
9-Jan-17	49:17.0	24.171	88.8	0	0.1153	0	0	325.7	4.2
9-Jan-17	49:17.0	24.774	87.3	0	0.1159	0	0	325.7	4.2
9-Jan-17	49:17.0	23.569	91.5	0	0.1148	0	0	325.7	4.2
9-Jan-17	49:17.0	23.737	93.6	0	0.1148	0	0	325.7	4.2
9-Jan-17	49:17.0	26.012	87.5	0	0.1153	0	0	325.7	4.255
9-Jan-17	49:17.0	24.388	96.8	0	0.308	0	0	157.2	4.231
9-Jan-17	49:17.0	24.944	88.6	0	0.1153	0	0	325.7	4.206
9-Jan-17	49:17.0	30.52	73.3	0	0.1143	0	1.01	304.7	4.339
9-Jan-17	49:17.0	31.052	70.9	0	0.1143	0	1.51	183.9	4.333
9-Jan-17	49:17.0	34.969	58.5	0	0.1138	0	1.51	161.5	4.333
9-Jan-17	49:17.0	36.119	54.5	0	0.1138	0	2.01	160	4.315
9-Jan-17	49:17.0	27.825	80.5	0	0.1143	0	1.01	306.1	4.345
9-Jan-17	49:17.0	27.284	83.5	4.8	0.1058	0	2.01	153	4.321
10-Jan-17	49:17.0	24.798	91.9	0	0.2445	0	0	169.9	4.218
10-Jan-17	49:17.0	32.949	63.1	0	0.2575	0	2.01	167.1	4.339
10-Jan-17	49:17.0	33.521	58.2	0	0.2505	0	2.01	164.3	4.339
10-Jan-17	49:17.0	31.153	63.8	0	0.2452	0	2.01	171.3	4.339
10-Jan-17	49:17.0	29.84	70.4	0	0.2421	0	2.52	147.4	4.303
10-Jan-17	49:17.0	28.221	77.2	0	0.2421	0	1.01	169.9	4.267
10-Jan-17	49:17.0	26.573	84.2	0	0.2425	0	0	169.9	4.249
10-Jan-17	49:17.0	26.622	84.1	0	0.2434	0	0	169.9	4.243
10-Jan-17	49:17.0	25.963	88.2	0	0.2437	0	0	169.9	4.224
10-Jan-17	49:17.0	34.202	59.1	0	0.2628	0	2.01	178.3	4.357
10-Jan-17	49:17.0	25.598	88	0	0.2445	0	0	169.9	4.224
10-Jan-17	49:17.0	26.451	86.7	0	0.2437	0	0	169.9	4.237
10-Jan-17	49:17.0	23.424	99	0	0.2853	0	0	157.2	4.2
10-Jan-17	49:17.0	32.381	66.9	0	0.2687	0	1.01	179.7	4.363
10-Jan-17	49:17.0	23.545	98.6	0	0.2908	0	0	157.2	4.206
10-Jan-17	49:17.0	23.4	98.8	0	0.2864	0	0	157.2	4.2
10-Jan-17	49:17.0	23.376	98.6	0	0.289	0	0	157.2	4.206
10-Jan-17	49:17.0	24.146	98.8	0	0.2844	0	0	157.2	4.224
10-Jan-17	49:17.0	25.477	97.5	0	0.284	0	0	157.2	4.369
10-Jan-17	49:17.0	28.742	85.9	0	0.284	0	0.5	181.1	4.339
10-Jan-17	49:17.0	29.439	81.6	0	0.2817	0	1.51	342.6	4.333
10-Jan-17	49:17.0	29.966	76	0	0.278	0	1.01	307.5	4.327
10-Jan-17	49:17.0	30.976	73.6	0	0.2736	0	1.01	248.5	4.363
10-Jan-17	49:17.0	23.4	98.8	0	0.2877	0	0	157.2	4.2
11-Jan-17	49:17.0	29.865	71.6	0	0.1642	0	2.52	154.4	4.255
11-Jan-17	49:17.0	24.895	93.1	0	0.2445	0	0	169.9	4.212
11-Jan-17	49:17.0	34.598	57.4	0	0.1718	0	3.02	154.4	4.381
11-Jan-17	49:17.0	32.691	61.4	0	0.1685	0	2.52	147.4	4.321
11-Jan-17	49:17.0	31.637	64	0	0.1663	0	2.52	164.3	4.291
11-Jan-17	49:17.0	27.825	72.8	0	0.1634	0	2.01	174.1	4.249
11-Jan-17	49:17.0	25.623	80.6	0	0.1634	0	2.52	176.9	4.237
11-Jan-17	49:17.0	24.798	83.2	0	0.1629	0	1.51	346.8	4.224
11-Jan-17	49:17.0	24.508	85.5	0	0.1629	0	1.51	345.4	4.224
11-Jan-17	49:17.0	23.954	87.9	0	0.1623	0	1.01	355.2	4.218
11-Jan-17	49:17.0	32.562	62.9	0	0.1891	0	1.01	202.2	4.321
11-Jan-17	49:17.0	24.315	86.1	0	0.1623	0	1.01	352.4	4.218
11-Jan-17	49:17.0	24.653	95.1	0	0.2434	0	0	169.9	4.206
11-Jan-17	49:17.0	35.904	53.8	0	0.1765	0	3.02	153	4.351
11-Jan-17	49:17.0	34.995	56	0	0.1816	0	2.52	157.2	4.321
11-Jan-17	49:17.0	24.315	94.8	0	0.2441	0	0	169.9	4.243
11-Jan-17	49:17.0	24.919	94.6	0	0.2425	0	0	169.9	4.2
11-Jan-17	49:17.0	25.793	93.1	0	0.241	0	0	169.9	4.237
11-Jan-17	49:17.0	27.308	88.2	0	0.2367	0	0.5	169.9	4.345
11-Jan-17	49:17.0	28.593	82.5	0	0.2299	0	1.51	169.9	4.333
11-Jan-17	49:17.0	31.077	72.3	0	0.2182	0	1.51	172.7	4.327
11-Jan-17	49:17.0	32.898	64.7	0	0.207	0	1.01	169.9	4.363
11-Jan-17	49:17.0	34.677	57.4	0	0.1967	0	2.01	169.9	4.321
11-Jan-17	49:17.0	24.895	93.3	0	0.2445	0	0	169.9	4.206
12-Jan-17	49:17.0	31.765	61.6	0	0.1446	0	2.01	355.2	4.327
12-Jan-17	49:17.0	25.768	92.6	0	0.14	0	0	352.4	4.261
12-Jan-17	49:17.0	31.51	62.4	0	0.143	0	1.01	328.5	4.321
12-Jan-17	49:17.0	28.444	80.4	0	0.1421	0	2.01	36.5	4.339
12-Jan-17	49:17.0	27.308	84.2	0	0.1416	0	1.01	36.5	4.297
12-Jan-17	49:17.0	26.134	89.7	0.2	0.1405	0	0	352.4	4.273
12-Jan-17	49:17.0	25.623	94.2	0	0.1391	0	0	352.4	4.249
12-Jan-17	49:17.0	25.598	95.2	0	0.1391	0	0	352.4	4.237
12-Jan-17	49:17.0	25.113	94.8	0.2	0.137	0	0	352.4	4.231
12-Jan-17	49:17.0	24.557	93.3	0	0.1375	0	0.5	352.4	4.224
12-Jan-17	49:17.0	24.412	91.8	0	0.1387	0	1.01	307.5	4.218
12-Jan-17	49:17.0	24.315	91.7	0	0.1387	0	1.01	331.3	4.224
12-Jan-17	49:17.0	23.857	94.5	0	0.1629	0	0	0	4.2
12-Jan-17	49:17.0	32.458	61	0	0.1466	0	1.51	349.6	4.321
12-Jan-17	49:17.0	23.857	90.8	0	0.1623	0	0	0	4.206
12-Jan-17	49:17.0	23.448	94	0	0.1629	0	0	0	4.206
12-Jan-17	49:17.0	23.737	90	0	0.1629	0	0.5	0	4.212
12-Jan-17	49:17.0	25.355	91.9	0	0.1629	0	0	0	4.237
12-Jan-17	49:17.0	27.431	83.7	0	0.1608	0	0.5	0	4.351
12-Jan-17	49:17.0	29.165	76.7	0	0.1581	0	1.01	338.3	4.351
12-Jan-17	49:17.0	29.34	72.1	0	0.1542	0	2.01	341.2	4.339
12-Jan-17	49:17.0	31.077	67.4	0	0.1514	0	2.01	355.2	4.345
12-Jan-17	49:17.0	32.691	61.4	0	0.149	0	2.52	355.2	4.327
12-Jan-17	49:17.0	23.472	92.5	0	0.1629	0	0	0	4.206
13-Jan-17	49:17.0	24.05	97.2	0.2	0.3371	0	0	36.5	4.224
13-Jan-17	49:17.0	24.05	94.7	8	0.4169	0	1.01	36.5	4.255
13-Jan-17	49:17.0	24.098	95.9	0.2	0.3649	0	0	40.7	4.249
13-Jan-17	49:17.0	23.737	96.4	0.4	0.3511	0	0	37.9	4.237
13-Jan-17	49:17.0	23.857	96.9	0.2	0.3437	0	0	36.5	4.231
13-Jan-17	49:17.0	24.098	97.7	0	0.3308	0	0	36.5	4.224
13-Jan-17	49:17.0	23.905	98	0	0.3261	0	0	36.5	4.218
13-Jan-17	49:17.0	23.593	98.1	0	0.3219	0	0	36.5	4.212
13-Jan-17	49:17.0	23.569	98.4	0	0.3183	0	0	36.5	4.206
13-Jan-17	49:17.0	24.339	92.3	0	0.1391	0	1.01	307.5	4.212
13-Jan-17	49:17.0	34.995	55.1	0	0.1335	0	3.52	25.3	4.339
13-Jan-17	49:17.0	23.713	98.7	0	0.3148	0	0	36.5	4.206
13-Jan-17	49:17.0	24.581	97.3	0	0.1321	0	0	355.2	4.2
13-Jan-17	49:17.0	24.243	92.4	12.8	0.3649	0	2.52	2.8	4.273
13-Jan-17	49:17.0	30.217	63.3	0	0.1276	0	3.02	9.8	4.315
13-Jan-17	49:17.0	23.881	95.7	0.4	0.1321	0	1.01	339.7	4.206
13-Jan-17	49:17.0	23.857	97.1	0.2	0.1321	0	0	355.2	4.2
13-Jan-17	49:17.0	24.026	93.5	0.2	0.1375	0	0	286.4	4.206
13-Jan-17	49:17.0	27.677	89.8	0	0.1375	0	1.51	351	4.357
13-Jan-17	49:17.0	29.84	77.5	0	0.1375	0	2.01	329.9	4.333
13-Jan-17	49:17.0	31.484	69.4	0	0.1361	0	2.01	355.2	4.333
13-Jan-17	49:17.0	32.82	63.5	0	0.1347	0	2.52	9.8	4.333
13-Jan-17	49:17.0	34.15	55.5	0	0.1347	0	3.52	346.8	4.339
13-Jan-17	49:17.0	23.978	96.5	0	0.1321	0	0	355.2	4.206
14-Jan-17	49:17.0	28.568	74.2	0	0.2806	0	1.01	320.1	4.303
14-Jan-17	49:17.0	24.002	95	0.2	0.2793	0	0.5	71.6	4.224
14-Jan-17	49:17.0	33.313	62.8	0	0.2857	0	2.01	334.1	4.345
14-Jan-17	49:17.0	29.815	69.7	0	0.2821	0	3.02	349.6	4.351
14-Jan-17	49:17.0	29.79	70.7	0	0.281	0	1.51	332.7	4.333
14-Jan-17	49:17.0	27.235	80.1	0	0.28	0	1.01	334.1	4.279
14-Jan-17	49:17.0	27.284	80.7	0	0.2793	0	1.01	331.3	4.261
14-Jan-17	49:17.0	27.579	79.9	0	0.279	0	2.01	329.9	4.249
14-Jan-17	49:17.0	26.891	81.3	0	0.2786	0	2.01	338.3	4.237
14-Jan-17	49:17.0	24.002	93.5	2.2	0.2766	0	2.01	66	4.224
14-Jan-17	49:17.0	32.717	62.5	0	0.2887	0	1.51	345.4	4.339
14-Jan-17	49:17.0	24.026	84.6	1.4	0.2743	0	5.54	351	4.231
14-Jan-17	49:17.0	23.881	99	0	0.3051	0	0	320.1	4.2
14-Jan-17	49:17.0	34.202	59.9	0	0.2922	0	2.52	321.5	4.351
14-Jan-17	49:17.0	31.153	65.1	0	0.2834	0	1.51	1.4	4.339
14-Jan-17	49:17.0	23.737	98.8	0	0.3121	0	0	36.5	4.267
14-Jan-17	49:17.0	23.833	98.9	0	0.3072	0	0	320.1	4.2
14-Jan-17	49:17.0	23.978	99.1	0	0.3033	0	0	320.1	4.2
14-Jan-17	49:17.0	24.871	99.2	0	0.3019	0	0	320.1	4.224
14-Jan-17	49:17.0	26.573	98.7	0	0.3019	0	0	320.1	4.369
14-Jan-17	49:17.0	29.715	88.2	0	0.3008	0	1.01	317.3	4.333
14-Jan-17	49:17.0	31.433	77.4	0	0.2984	0	2.01	331.3	4.351
14-Jan-17	49:17.0	33.053	67.3	0	0.2949	0	4.03	355.2	4.375
14-Jan-17	49:17.0	23.833	98.8	0	0.3095	0	0.5	351	4.2
15-Jan-17	49:17.0	28.816	69	0	0.265	0	2.01	5.6	4.206
15-Jan-17	49:17.0	30.596	65.2	0	0.2657	0	2.52	355.2	4.273
15-Jan-17	49:17.0	34.44	57.7	0	0.2701	0	3.52	355.2	4.339
15-Jan-17	49:17.0	33.94	58.5	0	0.2657	0	1.51	7	4.333
15-Jan-17	49:17.0	31.382	60.8	0	0.2657	0	2.52	7	4.321
15-Jan-17	49:17.0	29.665	66.7	0	0.2657	0	1.01	352.4	4.267
15-Jan-17	49:17.0	29.54	68.2	0	0.2657	0	2.01	342.6	4.243
15-Jan-17	49:17.0	29.09	69	0	0.2653	0	1.01	322.9	4.231
15-Jan-17	49:17.0	28.916	68.2	0	0.2653	0	0.5	306.1	4.224
15-Jan-17	49:17.0	29.04	67.6	0	0.265	0	1.51	342.6	4.212
15-Jan-17	49:17.0	33.235	62.8	0	0.2736	0	3.52	9.8	4.369
15-Jan-17	49:17.0	28.841	68	0	0.2653	0	1.01	351	4.218
15-Jan-17	49:17.0	23.881	94.8	0	0.2813	0	1.01	339.7	4.206
15-Jan-17	49:17.0	33.209	61.4	0	0.2684	0	1.51	346.8	4.339
15-Jan-17	49:17.0	34.466	60.2	0	0.2759	0	3.52	15.4	4.327
15-Jan-17	49:17.0	23.833	94.8	0.2	0.2813	0	1.01	325.7	4.212
15-Jan-17	49:17.0	23.761	95.3	0	0.2817	0	1.51	341.2	4.206
15-Jan-17	49:17.0	24.146	94.3	0.2	0.2824	0	2.01	328.5	4.206
15-Jan-17	49:17.0	25.331	91.9	0	0.284	0	1.01	22.5	4.224
15-Jan-17	49:17.0	27.431	80.9	0	0.2844	0	2.01	355.2	4.333
15-Jan-17	49:17.0	29.215	76.8	0	0.2834	0	3.52	1.4	4.339
15-Jan-17	49:17.0	31.001	68.8	0	0.281	0	2.52	1.4	4.333
15-Jan-17	49:17.0	31.816	65.3	0	0.2786	0	3.02	22.5	4.333
15-Jan-17	49:17.0	23.905	94.2	0	0.2803	0	1.01	23.9	4.218
16-Jan-17	49:17.0	29.916	68	0	0.2216	0	2.01	7	4.351
16-Jan-17	49:17.0	28.394	68.4	0	0.2109	0	2.01	348.2	4.267
16-Jan-17	49:17.0	30.117	67.6	0	0.2164	0	3.02	342.6	4.351
16-Jan-17	49:17.0	29.815	67.3	0	0.2126	0	3.52	348.2	4.345
16-Jan-17	49:17.0	29.565	67.4	0	0.2109	0	3.02	355.2	4.321
16-Jan-17	49:17.0	28.742	68.3	0	0.2109	0	2.52	1.4	4.285
16-Jan-17	49:17.0	28.221	68.7	0	0.2117	0	2.01	11.2	4.249
16-Jan-17	49:17.0	28.097	69.2	0	0.2126	0	1.51	4.2	4.237
16-Jan-17	49:17.0	27.899	70.6	0	0.2134	0	2.52	12.6	4.231
16-Jan-17	49:17.0	27.974	68.9	0	0.2139	0	2.01	7	4.224
16-Jan-17	49:17.0	29.515	67.1	0	0.241	0	5.03	15.4	4.369
16-Jan-17	49:17.0	27.949	68.4	0	0.2153	0	2.01	355.2	4.218
16-Jan-17	49:17.0	27.924	74.7	0	0.2646	0	2.01	355.2	4.206
16-Jan-17	49:17.0	29.991	68.4	0	0.2282	0	2.52	1.4	4.351
16-Jan-17	49:17.0	27.776	76.9	0	0.2642	0	2.52	344	4.2
16-Jan-17	49:17.0	26.036	86	0	0.2639	0	2.01	33.7	4.2
16-Jan-17	49:17.0	25.598	86.1	0	0.2635	0	0.5	348.2	4.2
16-Jan-17	49:17.0	25.598	90.3	0	0.2628	0	0	307.5	4.2
16-Jan-17	49:17.0	28.941	69.3	0	0.2571	0	2.52	334.1	4.333
16-Jan-17	49:17.0	28.593	69.6	0	0.2524	0	2.52	9.8	4.333
16-Jan-17	49:17.0	29.865	67.2	0	0.2471	0	2.52	5.6	4.327
16-Jan-17	49:17.0	28.444	71.4	0	0.265	0	2.01	353.8	4.206
16-Jan-17	49:17.0	29.79	66.9	0	0.2344	0	3.52	19.7	4.357
16-Jan-17	49:17.0	28.171	78.6	0	0.2607	0	2.01	342.6	4.375
17-Jan-17	49:17.0	22.8	96.3	2	0.3804	0	0	4.2	4.218
17-Jan-17	49:17.0	34.624	54.2	0	0.1652	0	2.01	8.4	4.339
17-Jan-17	49:17.0	34.15	53.7	0	0.1629	0	2.01	15.4	4.321
17-Jan-17	49:17.0	32.355	58	0	0.1615	0	2.52	353.8	4.273
17-Jan-17	49:17.0	30.444	66.8	0	0.1615	0	0.5	355.2	4.249
17-Jan-17	49:17.0	24.436	83.4	5.6	0.1519	0	4.03	78.6	4.237
17-Jan-17	49:17.0	23.064	93.2	33.81	0.4622	0	2.52	14	4.231
17-Jan-17	49:17.0	22.92	96.8	0.6	0.3622	0	0	4.2	4.212
17-Jan-17	49:17.0	22.729	95.8	7.2	0.4214	0	0	4.2	4.224
17-Jan-17	49:17.0	35.448	52.8	0	0.1724	0	3.02	12.6	4.357
17-Jan-17	49:17.0	35.502	51	0	0.1765	0	6.04	18.3	4.315
17-Jan-17	49:17.0	22.848	94.9	5.8	0.4141	0	0	4.2	4.224
17-Jan-17	49:17.0	26.842	75.3	0	0.2156	0	2.52	7	4.206
17-Jan-17	49:17.0	34.281	54.8	0	0.1681	0	2.52	30.9	4.339
17-Jan-17	49:17.0	27.259	72.6	0	0.2156	0	2.52	355.2	4.212
17-Jan-17	49:17.0	26.329	78.3	0	0.2161	0	1.51	2.8	4.206
17-Jan-17	49:17.0	26.256	78	0	0.2164	0	3.02	327.1	4.206
17-Jan-17	49:17.0	25.89	80.3	0	0.2161	0	0.5	331.3	4.2
17-Jan-17	49:17.0	26.671	79.4	0	0.2153	0	1.51	313.1	4.224
17-Jan-17	49:17.0	31.586	63.4	0	0.2035	0	2.01	1.4	4.357
17-Jan-17	49:17.0	32.381	60.3	0	0.1958	0	2.52	14	4.345
17-Jan-17	49:17.0	33.835	55.1	0	0.1885	0	3.02	11.2	4.357
17-Jan-17	49:17.0	35.422	50.3	0	0.1816	0	3.02	19.7	4.321
17-Jan-17	49:17.0	28.667	73.8	0	0.2104	0	3.02	5.6	4.363
18-Jan-17	49:17.0	22.968	99.5	0	0.316	0	0	342.6	4.206
18-Jan-17	49:17.0	22.848	97.7	2	0.3883	0	0	342.6	4.249
18-Jan-17	49:17.0	22.92	98	1.2	0.3683	0	0	342.6	4.249
18-Jan-17	49:17.0	22.968	98.2	0.4	0.3542	0	0	342.6	4.237
18-Jan-17	49:17.0	23.016	98.6	0	0.3432	0	0	342.6	4.224
18-Jan-17	49:17.0	22.992	98.7	0.2	0.3352	0	0	342.6	4.224
18-Jan-17	49:17.0	23.064	99	0	0.3286	0	0	342.6	4.224
18-Jan-17	49:17.0	22.968	99.5	0	0.3128	0	0	342.6	4.2
18-Jan-17	49:17.0	22.896	99.3	0	0.3192	0	0	342.6	4.206
18-Jan-17	49:17.0	22.321	96.3	13	0.4464	0	2.01	341.2	4.279
18-Jan-17	49:17.0	24.702	94.4	13	0.4451	0	0.5	203.6	4.297
18-Jan-17	49:17.0	23.064	99.3	0	0.324	0	0	342.6	4.212
18-Jan-17	49:17.0	22.992	97.8	0	0.3643	0	0	4.2	4.206
18-Jan-17	49:17.0	22.657	97.2	3.4	0.4444	0	0	344	4.267
18-Jan-17	49:17.0	23.016	97.5	2.8	0.4135	0	0	4.2	4.206
18-Jan-17	49:17.0	22.753	97.9	0	0.3481	0	0	4.2	4.2
18-Jan-17	49:17.0	22.824	98.2	0	0.3393	0	0	4.2	4.2
18-Jan-17	49:17.0	23.352	98.3	0	0.3321	0	0	4.2	4.206
18-Jan-17	49:17.0	25.939	96.5	0	0.3223	0	0	4.2	4.345
18-Jan-17	49:17.0	27.505	90	0	0.3192	0	0	2.8	4.339
18-Jan-17	49:17.0	29.59	83.5	0.2	0.3151	0	1.51	19.7	4.327
18-Jan-17	49:17.0	22.992	97.3	1	0.3531	0	0	4.2	4.206
18-Jan-17	49:17.0	28.394	84.2	0	0.3106	0	2.01	167.1	4.351
18-Jan-17	49:17.0	24.412	98.6	0	0.3261	0	0	4.2	4.351
19-Jan-17	49:17.0	24.026	98.3	0	0.2973	0	0	355.2	4.231
19-Jan-17	49:17.0	25.914	95.3	0	0.3011	0	0	133.4	4.339
19-Jan-17	49:17.0	24.968	93.6	0	0.3005	0	2.52	349.6	4.309
19-Jan-17	49:17.0	24.243	95.1	0.2	0.299	0	0	355.2	4.285
19-Jan-17	49:17.0	23.809	96.1	0	0.2987	0	0	355.2	4.267
19-Jan-17	49:17.0	23.641	96.9	0	0.2979	0	0	355.2	4.255
19-Jan-17	49:17.0	24.002	98.4	0	0.2966	0	0	355.2	4.224
19-Jan-17	49:17.0	23.881	97.9	0.4	0.2976	0	0	355.2	4.237
19-Jan-17	49:17.0	25.258	93.1	3.4	0.2976	0	2.01	153	4.291
19-Jan-17	49:17.0	30.596	79.1	0	0.2938	0	1.51	164.3	4.363
19-Jan-17	49:17.0	23.785	97.4	0	0.2973	0	0.5	355.2	4.249
19-Jan-17	49:17.0	22.681	100	0	0.304	0	0	342.6	4.2
19-Jan-17	49:17.0	25.38	95	0.2	0.3019	0	0	133.4	4.309
19-Jan-17	49:17.0	22.393	96.7	5	0.3008	0	2.52	1.4	4.243
19-Jan-17	49:17.0	22.705	99.8	0	0.3058	0	0	342.6	4.2
19-Jan-17	49:17.0	22.753	99.8	0	0.3098	0	0	342.6	4.2
19-Jan-17	49:17.0	22.872	100	0	0.3026	0	0	342.6	4.2
19-Jan-17	49:17.0	23.713	99.9	0	0.3015	0	0	342.6	4.218
19-Jan-17	49:17.0	24.629	99.8	0	0.3005	0	0	342.6	4.363
19-Jan-17	49:17.0	27.333	98.5	0	0.3008	0	0.5	327.1	4.363
19-Jan-17	49:17.0	29.14	85.8	0	0.3001	0	0.5	300.4	4.351
19-Jan-17	49:17.0	32.201	75.8	0	0.2979	0	1.01	273.8	4.357
19-Jan-17	49:17.0	33.131	68.5	0	0.2955	0	1.01	255.5	4.363
19-Jan-17	49:17.0	22.681	99.7	0	0.308	0	0	342.6	4.2
20-Jan-17	49:17.0	27.038	76	0	0.2955	0	2.01	349.6	4.285
20-Jan-17	49:17.0	29.89	71.7	0	0.3011	0	2.52	351	4.345
20-Jan-17	49:17.0	29.165	73.9	0	0.2994	0	3.02	11.2	4.339
20-Jan-17	49:17.0	28.667	74.6	0	0.2976	0	2.52	352.4	4.345
20-Jan-17	49:17.0	27.949	75.4	0	0.2963	0	3.02	355.2	4.315
20-Jan-17	49:17.0	26.402	77.5	0	0.2949	0	2.01	335.5	4.267
20-Jan-17	49:17.0	25.793	79.2	0	0.2949	0	2.01	336.9	4.249
20-Jan-17	49:17.0	25.525	82.1	0	0.2942	0	1.01	307.5	4.243
20-Jan-17	49:17.0	25.574	82.4	0	0.2938	0	0.5	324.3	4.237
20-Jan-17	49:17.0	25.939	80.5	0	0.2935	0	1.51	315.9	4.255
20-Jan-17	49:17.0	29.365	76	0	0.304	0	2.01	353.8	4.339
20-Jan-17	49:17.0	25.768	82.5	0	0.2932	0	0.5	342.6	4.224
20-Jan-17	49:17.0	21.987	98.6	2.2	0.3611	0	0	355.2	4.212
20-Jan-17	49:17.0	22.106	98	4.6	0.3677	0	1.01	349.6	4.218
20-Jan-17	49:17.0	21.891	98.9	0.6	0.3496	0	0	355.2	4.206
20-Jan-17	49:17.0	21.891	99.2	0	0.3408	0	0	355.2	4.206
20-Jan-17	49:17.0	21.939	99.3	0	0.3339	0	1.01	352.4	4.2
20-Jan-17	49:17.0	22.561	99.3	0	0.329	0	0.5	322.9	4.218
20-Jan-17	49:17.0	26.036	90.5	0	0.3216	0	2.01	12.6	4.351
20-Jan-17	49:17.0	26.793	85.2	0	0.3183	0	3.02	353.8	4.345
20-Jan-17	49:17.0	26.695	83.9	0	0.3144	0	3.52	1.4	4.339
20-Jan-17	49:17.0	28.444	77.4	0	0.3102	0	2.52	353.8	4.339
20-Jan-17	49:17.0	24.484	98.1	0	0.324	0	1.51	335.5	4.363
20-Jan-17	49:17.0	28.32	77.7	0	0.3072	0	2.52	349.6	4.339
21-Jan-17	49:17.0	23.28	98.3	0	0.2887	0	0	280.8	4.237
21-Jan-17	49:17.0	24.774	92.4	0.2	0.2884	0	0.5	278	4.333
21-Jan-17	49:17.0	25.38	92.8	0	0.289	0	0.5	282.2	4.345
21-Jan-17	49:17.0	24.508	94	0	0.2901	0	0	282.2	4.315
21-Jan-17	49:17.0	24.195	95.8	0	0.2901	0	0	282.2	4.291
21-Jan-17	49:17.0	23.785	96.6	0	0.2898	0	0	282.2	4.273
21-Jan-17	49:17.0	23.448	97.2	0	0.2895	0	0	280.8	4.261
21-Jan-17	49:17.0	22.92	98	0	0.289	0	0	280.8	4.249
21-Jan-17	49:17.0	25.453	79.7	0.2	0.2895	0	3.52	355.2	4.333
21-Jan-17	49:17.0	29.765	71.1	0	0.2914	0	3.02	339.7	4.363
21-Jan-17	49:17.0	23.112	97.6	0	0.2895	0	0	280.8	4.249
21-Jan-17	49:17.0	23.184	95.3	1.8	0.2966	0	0	40.7	4.212
21-Jan-17	49:17.0	24.291	91.3	1.2	0.2877	0	1.51	335.5	4.339
21-Jan-17	49:17.0	23.424	93.3	1.6	0.2908	0	0.5	39.3	4.218
21-Jan-17	49:17.0	23.352	98.6	0	0.2887	0	0	280.8	4.224
21-Jan-17	49:17.0	22.992	96.2	0.2	0.2997	0	1.51	9.8	4.206
21-Jan-17	49:17.0	22.753	96.1	0	0.2994	0	0.5	355.2	4.206
21-Jan-17	49:17.0	22.753	95.9	0	0.2984	0	1.01	353.8	4.206
21-Jan-17	49:17.0	25.477	88.2	0	0.299	0	1.51	332.7	4.357
21-Jan-17	49:17.0	27.382	81.1	0	0.2984	0	3.02	342.6	4.339
21-Jan-17	49:17.0	28.543	76.3	0	0.2966	0	2.52	2.8	4.333
21-Jan-17	49:17.0	29.89	72.2	0	0.2949	0	2.01	1.4	4.333
21-Jan-17	49:17.0	30.672	69.9	0	0.2932	0	2.52	355.2	4.327
21-Jan-17	49:17.0	23.737	94.5	0	0.2973	0	0.5	339.7	4.224
22-Jan-17	49:17.0	21.557	97.9	0	0.3175	0	0	346.8	4.231
22-Jan-17	49:17.0	34.229	63.3	0	0.279	0	1.51	178.3	4.315
22-Jan-17	49:17.0	30.091	74	0	0.2776	0	3.02	162.9	4.369
22-Jan-17	49:17.0	26.891	88.1	0.2	0.2776	0	2.01	169.9	4.303
22-Jan-17	49:17.0	21.724	93.9	9.2	0.3542	0	5.54	351	4.279
22-Jan-17	49:17.0	21.819	95.7	0.2	0.3376	0	0	346.8	4.267
22-Jan-17	49:17.0	21.437	96.5	0	0.3299	0	0	346.8	4.255
22-Jan-17	49:17.0	21.39	98.1	0	0.3151	0	0	346.8	4.224
22-Jan-17	49:17.0	21.604	97.6	0	0.3211	0	0	346.8	4.237
22-Jan-17	49:17.0	21.294	98.4	0	0.3125	0	0	346.8	4.224
22-Jan-17	49:17.0	33.287	69.2	0.2	0.2806	0	2.01	155.8	4.321
22-Jan-17	49:17.0	21.485	97.1	0	0.3252	0	0	346.8	4.249
22-Jan-17	49:17.0	23.136	99.3	0	0.2877	0	0	280.8	4.212
22-Jan-17	49:17.0	23.328	99	0	0.2881	0	0	280.8	4.218
22-Jan-17	49:17.0	31.357	69.6	0	0.2834	0	2.01	148.8	4.321
22-Jan-17	49:17.0	23.232	99.1	0	0.2881	0	0	280.8	4.212
22-Jan-17	49:17.0	22.944	99.4	0	0.2877	0	0	280.8	4.206
22-Jan-17	49:17.0	23.472	99.6	0	0.2877	0	0	280.8	4.206
22-Jan-17	49:17.0	25.04	98.9	0	0.2884	0	0.5	238.7	4.357
22-Jan-17	49:17.0	26.5	97.1	0	0.2881	0	0.5	179.7	4.333
22-Jan-17	49:17.0	28.122	88.2	0	0.2877	0	1.01	127.8	4.345
22-Jan-17	49:17.0	31.052	75.9	0	0.2864	0	2.01	228.8	4.333
22-Jan-17	49:17.0	33.391	68.4	0	0.285	0	1.01	132	4.321
22-Jan-17	49:17.0	23.304	98.8	0	0.2884	0	0	280.8	4.224
23-Jan-17	49:17.0	23.569	94.4	7	0.3573	0	2.52	161.5	4.291
23-Jan-17	49:17.0	24.508	97.7	0	0.3216	0	0.5	169.9	4.285
23-Jan-17	49:17.0	24.388	96.2	0	0.3393	0	0	168.5	4.321
23-Jan-17	49:17.0	24.992	96.9	0	0.3308	0	0	169.9	4.321
23-Jan-17	49:17.0	25.162	97.2	0	0.3252	0	0	169.9	4.309
23-Jan-17	49:17.0	22.753	99.5	0	0.3029	0	0	346.8	4.212
23-Jan-17	49:17.0	24.05	98	0	0.3183	0	0	169.9	4.267
23-Jan-17	49:17.0	24.026	98.4	0	0.316	0	0	169.9	4.255
23-Jan-17	49:17.0	23.809	98.8	0	0.3133	0	0	169.9	4.249
23-Jan-17	49:17.0	24.002	99	0	0.3113	0	0	169.9	4.237
23-Jan-17	49:17.0	24.098	99.2	0	0.3077	0	0	169.9	4.224
23-Jan-17	49:17.0	24.267	99.1	0	0.3095	0	0	169.9	4.231
23-Jan-17	49:17.0	21.39	98.6	0	0.3106	0	0	346.8	4.218
23-Jan-17	49:17.0	27.358	84.3	0.2	0.2922	0	2.01	176.9	4.333
23-Jan-17	49:17.0	21.199	98.9	0	0.3084	0	0	346.8	4.212
23-Jan-17	49:17.0	21.199	99	0	0.3066	0	0	346.8	4.206
23-Jan-17	49:17.0	21.485	99.3	0	0.3048	0	0	346.8	4.206
23-Jan-17	49:17.0	22.034	99.4	0	0.3037	0	0	346.8	4.206
23-Jan-17	49:17.0	24.484	99.1	0	0.3029	0	0	346.8	4.351
23-Jan-17	49:17.0	28.295	88	0	0.3015	0	1.01	342.6	4.339
23-Jan-17	49:17.0	30.545	81.3	0	0.2994	0	2.01	153	4.357
23-Jan-17	49:17.0	32.407	72.8	0	0.297	0	1.51	143.2	4.339
23-Jan-17	49:17.0	33.235	69.6	0	0.2946	0	2.52	178.3	4.339
23-Jan-17	49:17.0	26.378	97.4	0	0.3022	0	0.5	346.8	4.351
24-Jan-17	49:17.0	25.162	96.4	0	0.2847	0	0	172.7	4.224
24-Jan-17	49:17.0	32.047	73.2	0	0.2895	0	3.02	153	4.321
24-Jan-17	49:17.0	29.941	76.1	0	0.2887	0	2.01	174.1	4.339
24-Jan-17	49:17.0	28.816	79.4	0	0.2881	0	0	172.7	4.315
24-Jan-17	49:17.0	27.112	85.3	0	0.2874	0	0	172.7	4.279
24-Jan-17	49:17.0	27.014	87.1	0	0.2871	0	0	172.7	4.261
24-Jan-17	49:17.0	26.061	93.1	0.2	0.285	0	0	172.7	4.249
24-Jan-17	49:17.0	24.823	96.8	0	0.2847	0	0	172.7	4.218
24-Jan-17	49:17.0	25.331	95.8	0	0.285	0	0	172.7	4.231
24-Jan-17	49:17.0	32.613	73.4	0.2	0.2908	0	0.5	181.1	4.339
24-Jan-17	49:17.0	32.536	73.7	0	0.2955	0	2.52	176.9	4.339
24-Jan-17	49:17.0	25.744	95	0	0.285	0	0	172.7	4.237
24-Jan-17	49:17.0	24.026	99.6	0	0.3037	0	0	169.9	4.212
24-Jan-17	49:17.0	32.253	72.3	0	0.2922	0	1.51	162.9	4.321
24-Jan-17	49:17.0	24.002	99.5	0	0.3048	0	0	169.9	4.218
24-Jan-17	49:17.0	24.026	99.6	0	0.3026	0	0	169.9	4.206
24-Jan-17	49:17.0	24.074	99.6	0	0.3015	0	0	169.9	4.206
24-Jan-17	49:17.0	24.702	99.7	0	0.3011	0	0	169.9	4.218
24-Jan-17	49:17.0	27.776	90.5	0	0.3005	0	1.01	169.9	4.339
24-Jan-17	49:17.0	29.991	81.9	0.2	0.299	0	0.5	348.2	4.339
24-Jan-17	49:17.0	30.874	79	0	0.2976	0	0	331.3	4.351
24-Jan-17	49:17.0	29.49	81.3	0	0.2938	0	2.01	175.5	4.339
24-Jan-17	49:17.0	25.866	98.7	0	0.3008	0	0	169.9	4.339
24-Jan-17	49:17.0	24.026	99.5	0	0.3066	0	0	169.9	4.224
25-Jan-17	49:17.0	25.841	92.9	0	0.3037	0	0	157.2	4.224
25-Jan-17	49:17.0	37.976	49.1	0	0.2753	0	2.52	331.3	4.315
25-Jan-17	49:17.0	30.016	78.4	0	0.3282	0	1.01	348.2	4.351
25-Jan-17	49:17.0	31.561	69.6	0	0.3211	0	2.01	186.7	4.351
25-Jan-17	49:17.0	28.717	77.8	0	0.3168	0	2.01	172.7	4.321
25-Jan-17	49:17.0	27.21	86.1	0	0.3136	0	0	157.2	4.285
25-Jan-17	49:17.0	26.426	92.6	0	0.3092	0	0	157.2	4.249
25-Jan-17	49:17.0	25.162	94.2	0	0.3048	0	0	157.2	4.224
25-Jan-17	49:17.0	26.5	90.7	0	0.311	0	0	157.2	4.261
25-Jan-17	49:17.0	35.502	52.8	0	0.2773	0	3.02	5.6	4.321
25-Jan-17	49:17.0	25.914	93.2	0	0.3066	0	0	157.2	4.231
25-Jan-17	49:17.0	24.919	97.4	0	0.2844	0	0	172.7	4.212
25-Jan-17	49:17.0	26.402	92.2	0	0.3077	0	0	157.2	4.237
25-Jan-17	49:17.0	26.329	88.7	10.2	0.3427	0	2.52	283.6	4.339
25-Jan-17	49:17.0	35.102	58.7	0	0.2786	0	2.52	355.2	4.363
25-Jan-17	49:17.0	24.944	97.4	0	0.2844	0	0	172.7	4.206
25-Jan-17	49:17.0	24.484	97.8	0	0.2844	0	0	172.7	4.206
25-Jan-17	49:17.0	24.605	98.2	0	0.2844	0	0	172.7	4.206
25-Jan-17	49:17.0	24.726	98.5	0.2	0.2844	0	0	172.7	4.2
25-Jan-17	49:17.0	29.54	85.6	0	0.2834	0	1.01	175.5	4.339
25-Jan-17	49:17.0	33.105	65.1	0	0.2803	0	3.02	353.8	4.381
25-Jan-17	49:17.0	27.284	94.1	0	0.2844	0	0.5	172.7	4.297
25-Jan-17	49:17.0	25.671	98.4	0	0.284	0	0	172.7	4.218
25-Jan-17	49:17.0	31.281	75.2	0	0.2821	0	1.51	299	4.327
26-Jan-17	49:17.0	26.573	94.6	0	0.2864	0	0	172.7	4.249
26-Jan-17	49:17.0	25.817	95.7	0	0.2861	0	0	172.7	4.224
26-Jan-17	49:17.0	26.134	95.4	0	0.2864	0	0	172.7	4.249
26-Jan-17	49:17.0	25.065	96.7	0	0.2853	0	0	172.7	4.218
26-Jan-17	49:17.0	28.941	83.2	0	0.2898	0	1.01	266.7	4.321
26-Jan-17	49:17.0	24.702	97.4	0	0.2853	0	0	172.7	4.212
26-Jan-17	49:17.0	27.235	93.2	0	0.2871	0	0	172.7	4.261
26-Jan-17	49:17.0	28.866	90.6	0	0.2874	0	0	172.7	4.279
26-Jan-17	49:17.0	29.615	88.1	0	0.2877	0	0	172.7	4.315
26-Jan-17	49:17.0	29.665	85.5	0	0.2881	0	0	172.7	4.315
26-Jan-17	49:17.0	30.748	80.5	0	0.289	0	0	172.7	4.351
26-Jan-17	49:17.0	24.847	97.1	0	0.2997	0	0	259.7	4.2
26-Jan-17	49:17.0	25.477	96	0	0.2857	0	0	172.7	4.224
26-Jan-17	49:17.0	24.968	95	0	0.3015	0	1.01	247.1	4.212
26-Jan-17	49:17.0	31.919	69.5	0	0.2908	0	2.01	318.7	4.333
26-Jan-17	49:17.0	24.847	96.4	0	0.3005	0	0	259.7	4.206
26-Jan-17	49:17.0	25.331	93.7	0	0.3022	0	0	157.2	4.218
26-Jan-17	49:17.0	25.647	97.1	0	0.2994	0	0	259.7	4.206
26-Jan-17	49:17.0	27.751	90.2	0	0.299	0	0	273.8	4.237
26-Jan-17	49:17.0	30.192	83.7	0	0.2979	0	0.5	286.4	4.345
26-Jan-17	49:17.0	32.15	73.3	0	0.2966	0	0.5	249.9	4.339
26-Jan-17	49:17.0	33.027	69	0	0.2949	0	2.52	313.1	4.327
26-Jan-17	49:17.0	35.368	60.5	0	0.2925	0	1.51	324.3	4.381
26-Jan-17	49:17.0	24.919	95.9	0	0.3011	0	0	259.7	4.206
27-Jan-17	49:17.0	24.05	95	0	0.2736	0	0	171.3	4.218
27-Jan-17	49:17.0	24.508	93.7	0	0.2739	0	0	171.3	4.224
27-Jan-17	49:17.0	25.283	91	0	0.2739	0	0	171.3	4.231
27-Jan-17	49:17.0	25.914	88.2	0	0.2746	0	0	171.3	4.237
27-Jan-17	49:17.0	26.5	86.7	0	0.2746	0	0	171.3	4.249
27-Jan-17	49:17.0	27.087	81.3	0	0.2746	0	1.01	171.3	4.261
27-Jan-17	49:17.0	29.14	74.6	0	0.2753	0	1.51	162.9	4.291
27-Jan-17	49:17.0	31.026	71.3	0	0.2756	0	1.01	263.9	4.321
27-Jan-17	49:17.0	23.93	96.1	0	0.2732	0	0	171.3	4.212
27-Jan-17	49:17.0	32.742	63.7	0	0.277	0	1.01	339.7	4.351
27-Jan-17	49:17.0	23.376	98.8	0	0.284	0	0	172.7	4.2
27-Jan-17	49:17.0	31.204	70.6	0	0.2763	0	1.01	308.9	4.333
27-Jan-17	49:17.0	34.81	63.8	0	0.2793	0	1.51	176.9	4.339
27-Jan-17	49:17.0	30.444	86	0	0.281	0	1.01	168.5	4.363
27-Jan-17	49:17.0	29.439	84.9	0	0.2813	0	1.01	292	4.345
27-Jan-17	49:17.0	30.874	77.1	0	0.2817	0	1.01	251.3	4.339
27-Jan-17	49:17.0	29.991	85.8	0	0.283	0	0.5	286.4	4.381
27-Jan-17	49:17.0	24.798	98.8	0	0.284	0	0.5	178.3	4.2
27-Jan-17	49:17.0	23.737	98.8	0	0.2844	0	0	172.7	4.2
27-Jan-17	49:17.0	23.809	98.5	0	0.2847	0	0	172.7	4.2
27-Jan-17	49:17.0	24.195	98.2	0	0.2847	0	0	172.7	4.206
27-Jan-17	49:17.0	24.508	97.8	0	0.285	0	0	172.7	4.206
27-Jan-17	49:17.0	32.484	61.1	0	0.278	0	1.51	259.7	4.339
27-Jan-17	49:17.0	27.136	96.5	0	0.2837	0	0.5	271	4.2
28-Jan-17	49:17.0	23.809	97.1	0	0.3098	0	1.01	322.9	4.249
28-Jan-17	49:17.0	24.002	96.9	0	0.3121	0	0	168.5	4.261
28-Jan-17	49:17.0	23.689	97.1	0	0.3102	0	0.5	160	4.249
28-Jan-17	49:17.0	23.569	96.6	0	0.2732	0	0	171.3	4.212
28-Jan-17	49:17.0	24.146	93.6	0	0.3077	0	1.01	303.2	4.212
28-Jan-17	49:17.0	24.146	94.8	0	0.308	0	1.51	8.4	4.218
28-Jan-17	49:17.0	23.954	96.6	0	0.3084	0	1.01	342.6	4.224
28-Jan-17	49:17.0	23.833	97.1	0	0.311	0	1.51	300.4	4.243
28-Jan-17	49:17.0	24.243	96.5	0.2	0.3148	0	0	168.5	4.279
28-Jan-17	49:17.0	23.809	95.7	0.2	0.3199	0	1.51	110.9	4.267
28-Jan-17	49:17.0	23.521	94.1	4.8	0.324	0	4.03	353.8	4.267
28-Jan-17	49:17.0	24.002	89.8	9.8	0.2618	0	4.03	292	4.291
28-Jan-17	49:17.0	23.112	97.5	0	0.2729	0	0	171.3	4.206
28-Jan-17	49:17.0	23.713	97.2	0	0.3087	0	0.5	338.3	4.224
28-Jan-17	49:17.0	23.256	97	0	0.2732	0	0	171.3	4.206
28-Jan-17	49:17.0	29.59	80.1	0.2	0.2639	0	0.5	245.7	4.339
28-Jan-17	49:17.0	23.04	97.8	0	0.2729	0	0	171.3	4.2
28-Jan-17	49:17.0	22.92	98	0	0.2726	0	0	172.7	4.2
28-Jan-17	49:17.0	24.339	97.8	0	0.2726	0	0.5	230.2	4.2
28-Jan-17	49:17.0	26.769	92.3	0	0.2719	0	1.51	306.1	4.2
28-Jan-17	49:17.0	29.64	82.2	0	0.2705	0	0.5	299	4.369
28-Jan-17	49:17.0	32.253	71.5	0	0.2691	0	1.51	292	4.339
28-Jan-17	49:17.0	35.075	59.2	0	0.2673	0	1.01	271	4.321
28-Jan-17	49:17.0	37.425	52.3	0	0.2653	0	1.01	283.6	4.321
29-Jan-17	49:17.0	26.744	79	0	0.2857	0	3.02	32.3	4.2
29-Jan-17	49:17.0	36.525	51	0	0.2911	0	1.01	174.1	4.327
29-Jan-17	49:17.0	33.992	57.7	0	0.2901	0	1.51	174.1	4.285
29-Jan-17	49:17.0	31.714	65.7	0	0.2895	0	0.5	174.1	4.249
29-Jan-17	49:17.0	29.464	80.3	0	0.2887	0	0	174.1	4.231
29-Jan-17	49:17.0	28.295	86	0	0.2877	0	0	174.1	4.224
29-Jan-17	49:17.0	27.456	90.1	0	0.2871	0	0	174.1	4.218
29-Jan-17	49:17.0	24.508	89.4	0.4	0.2803	0	2.01	19.7	4.2
29-Jan-17	49:17.0	28.345	83.4	0	0.2864	0	1.01	174.1	4.206
29-Jan-17	49:17.0	36.417	50.1	0	0.2925	0	1.01	174.1	4.345
29-Jan-17	49:17.0	24.388	93.3	0	0.3069	0	0.5	293.4	4.206
29-Jan-17	49:17.0	27.161	89.7	0	0.2868	0	0	174.1	4.212
29-Jan-17	49:17.0	37.618	50.7	0	0.2942	0	1.51	168.5	4.339
29-Jan-17	49:17.0	36.2	51.3	0	0.2959	0	1.51	310.3	4.339
29-Jan-17	49:17.0	36.308	52.9	0	0.2984	0	1.51	289.2	4.345
29-Jan-17	49:17.0	33.521	67	0	0.2997	0	2.01	299	4.333
29-Jan-17	49:17.0	30.343	78.6	0	0.3015	0	2.01	303.2	4.345
29-Jan-17	49:17.0	27.358	86.1	0	0.3029	0	1.01	352.4	4.357
29-Jan-17	49:17.0	26.061	91.1	0	0.3037	0	0	355.2	4.315
29-Jan-17	49:17.0	24.46	94.8	0	0.3043	0	0	355.2	4.2
29-Jan-17	49:17.0	23.954	93.8	0	0.3048	0	0	355.2	4.2
29-Jan-17	49:17.0	23.93	92.9	0	0.3054	0	1.01	351	4.2
29-Jan-17	49:17.0	24.653	91.1	0	0.3066	0	1.01	293.4	4.2
29-Jan-17	49:17.0	24.726	90.4	0	0.3058	0	2.01	289.2	4.2
30-Jan-17	49:17.0	28.419	73.3	0	0.2715	0	1.51	355.2	4.267
30-Jan-17	49:17.0	24.243	93.7	0.2	0.2796	0	0	346.8	4.2
30-Jan-17	49:17.0	24.46	93.5	0	0.2712	0	0	294.8	4.212
30-Jan-17	49:17.0	24.702	92.4	0	0.2719	0	0	294.8	4.218
30-Jan-17	49:17.0	24.871	91.6	0	0.2719	0	0	294.8	4.224
30-Jan-17	49:17.0	25.574	88.1	0	0.2719	0	0	294.8	4.231
30-Jan-17	49:17.0	26.549	81.3	0	0.2715	0	1.51	299	4.249
30-Jan-17	49:17.0	29.89	81.4	0	0.2719	0	0	167.1	4.291
30-Jan-17	49:17.0	30.394	77.8	0	0.2719	0	0	167.1	4.327
30-Jan-17	49:17.0	32.073	72.2	0	0.2722	0	1.01	169.9	4.345
30-Jan-17	49:17.0	30.066	78.1	0	0.2732	0	2.01	169.9	4.321
30-Jan-17	49:17.0	33.261	66.6	0	0.2726	0	2.52	167.1	4.321
30-Jan-17	49:17.0	23.521	96.2	0	0.2796	0	0	346.8	4.2
30-Jan-17	49:17.0	26.085	84.2	0	0.2715	0	0	294.8	4.237
30-Jan-17	49:17.0	23.737	95.5	0	0.28	0	0	346.8	4.2
30-Jan-17	49:17.0	35.155	62.3	0	0.2746	0	2.01	161.5	4.321
30-Jan-17	49:17.0	23.352	96.8	0	0.2796	0	0	346.8	4.2
30-Jan-17	49:17.0	23.4	97.1	0	0.2793	0	0	346.8	4.194
30-Jan-17	49:17.0	24.436	96.5	0	0.28	0	0	346.8	4.194
30-Jan-17	49:17.0	26.646	89.5	0	0.2817	0	0	341.2	4.224
30-Jan-17	49:17.0	29.966	81.4	0	0.2821	0	0	314.5	4.381
30-Jan-17	49:17.0	31.103	74.4	0	0.2817	0	0	172.7	4.339
30-Jan-17	49:17.0	32.665	66.6	0	0.28	0	0	174.1	4.333
30-Jan-17	49:17.0	34.281	63.2	0	0.278	0	0	162.9	4.321
31-Jan-17	49:17.0	25.162	92.8	0	0.2516	0	0	165.7	4.218
31-Jan-17	49:17.0	34.863	56.6	0	0.2567	0	4.53	150.2	4.321
31-Jan-17	49:17.0	33.652	55.7	0	0.2542	0.5	3.52	151.6	4.375
31-Jan-17	49:17.0	32.304	58.7	0	0.2532	0	3.02	153	4.321
31-Jan-17	49:17.0	31.179	63	0	0.2524	0	2.01	171.3	4.291
31-Jan-17	49:17.0	28.543	75.3	0	0.2524	0	0	165.7	4.255
31-Jan-17	49:17.0	27.456	81.9	0	0.2524	0	0	165.7	4.249
31-Jan-17	49:17.0	24.677	94.2	0	0.2512	0	0	165.7	4.218
31-Jan-17	49:17.0	25.72	90.8	0	0.2516	0	0	165.7	4.255
31-Jan-17	49:17.0	35.689	61.4	0	0.2592	0	3.02	147.4	4.315
31-Jan-17	49:17.0	23.088	97.1	0	0.2708	0	0	296.2	4.2
31-Jan-17	49:17.0	26.524	88.2	0	0.252	0	0	165.7	4.231
31-Jan-17	49:17.0	23.93	94.7	0	0.2712	0	0	296.2	4.206
31-Jan-17	49:17.0	26.646	92.1	0	0.2705	0	0.5	296.2	4.224
31-Jan-17	49:17.0	24.291	93.1	0	0.2712	0	0.5	296.2	4.206
31-Jan-17	49:17.0	35.77	62.6	0	0.2615	0	2.52	155.8	4.333
31-Jan-17	49:17.0	23.4	95.8	0	0.2708	0	0	296.2	4.206
31-Jan-17	49:17.0	23.136	96.5	0	0.2705	0	0	296.2	4.2
31-Jan-17	49:17.0	24.508	94.9	0	0.2509	0	0	165.7	4.212
31-Jan-17	49:17.0	29.815	80.6	0	0.2694	0	1.01	300.4	4.381
31-Jan-17	49:17.0	31.255	77.8	0	0.2677	0	0.5	256.9	4.339
31-Jan-17	49:17.0	32.975	70.6	0	0.2664	0	1.51	153	4.345
31-Jan-17	49:17.0	33.704	68.7	0	0.2642	0	3.52	126.4	4.321
31-Jan-17	49:17.0	24.532	97	0	0.2712	0	0	296.2	4.2
1-Feb-17	49:17.0	29.865	78.8	0	0.2318	0	0.5	167.1	4.291
1-Feb-17	49:17.0	31.561	70.7	0	0.2355	0	2.52	155.8	4.357
1-Feb-17	49:17.0	31.612	71.1	0	0.2344	0	2.01	151.6	4.375
1-Feb-17	49:17.0	33.027	65.8	0	0.2323	0	3.02	155.8	4.363
1-Feb-17	49:17.0	31.001	74.2	0	0.2318	0	1.01	167.1	4.321
1-Feb-17	49:17.0	26.012	89.8	0	0.2303	0	0	167.1	4.224
1-Feb-17	49:17.0	26.353	88.6	0	0.2311	0	0	167.1	4.237
1-Feb-17	49:17.0	25.574	92.6	0	0.2294	0	0	279.4	4.218
1-Feb-17	49:17.0	25.113	94	0	0.2294	0	0	279.4	4.212
1-Feb-17	49:17.0	32.124	68.8	0	0.2371	0	2.52	146	4.351
1-Feb-17	49:17.0	25.55	91.1	0	0.2299	0	0.5	217.6	4.224
1-Feb-17	49:17.0	23.665	96.8	0	0.2505	0	0	165.7	4.2
1-Feb-17	49:17.0	23.785	96.4	0	0.2509	0	0	165.7	4.206
1-Feb-17	49:17.0	32.691	69.8		0.2403	0	2.01	137.6	4.321
1-Feb-17	49:17.0	27.825	87.1	0	0.2311	0	0	167.1	4.249
1-Feb-17	49:17.0	28.891	81.9	0	0.2311	0	0	167.1	4.267
1-Feb-17	49:17.0	23.857	97.2	0	0.2505	0	0	165.7	4.2
1-Feb-17	49:17.0	24.388	97.2	0	0.2502	0	0	165.7	4.2
1-Feb-17	49:17.0	24.823	96.2	0	0.2502	0	0	165.7	4.2
1-Feb-17	49:17.0	27.604	86.1	0	0.249	0	0	165.7	4.357
1-Feb-17	49:17.0	26.134	92	0	0.2502	0	0.5	165.7	4.291
1-Feb-17	49:17.0	30.722	75.3	0.2	0.2434	0	2.01	164.3	4.345
1-Feb-17	49:17.0	29.19	79.8	0	0.2468	0	1.01	169.9	4.357
1-Feb-17	49:17.0	24.074	95.5	0	0.2509	0	0	165.7	4.237
2-Feb-17	49:17.0	35.182	59	0	0.2182	0	1.51	161.5	4.406
2-Feb-17	49:17.0	36.851	55.8	0	0.2161	0	1.51	154.4	4.351
2-Feb-17	49:17.0	30.874	69.6	0	0.2164	0	2.01	164.3	4.333
2-Feb-17	49:17.0	28.245	75.2	0	0.2169	0	1.01	162.9	4.297
2-Feb-17	49:17.0	29.29	75.1	0	0.2148	0	0.5	290.6	4.333
2-Feb-17	49:17.0	27.554	80.6	0	0.2122	0	0	290.6	4.285
2-Feb-17	49:17.0	29.34	72.5	0	0.2134	0	0	290.6	4.315
2-Feb-17	49:17.0	33.678	63.3	0	0.2211	0	1.01	217.6	4.327
2-Feb-17	49:17.0	24.388	92.5	0	0.2291	0	0	280.8	4.2
2-Feb-17	49:17.0	25.939	87.6	0	0.2109	0	0	289.2	4.249
2-Feb-17	49:17.0	26.646	85.6	0	0.2117	0	0	290.6	4.261
2-Feb-17	49:17.0	29.015	73.3	0	0.2164	0	1.01	213.4	4.339
2-Feb-17	49:17.0	31.103	72.8	0	0.2241	0	0.5	273.8	4.327
2-Feb-17	49:17.0	30.217	79.5	0	0.2269	0	0.5	279.4	4.339
2-Feb-17	49:17.0	27.284	86.2	0	0.2282	0	0	280.8	4.339
2-Feb-17	49:17.0	25.404	90	0	0.2109	0	0	289.2	4.237
2-Feb-17	49:17.0	24.05	94.2	0	0.2291	0	0	280.8	4.224
2-Feb-17	49:17.0	24.871	91.6	0	0.2291	0	0	279.4	4.2
2-Feb-17	49:17.0	24.992	90.6	0	0.2294	0	0	279.4	4.206
2-Feb-17	49:17.0	25.186	93.1	0	0.2299	0	0	279.4	4.206
2-Feb-17	49:17.0	24.46	93.8	0	0.2104	0	0	289.2	4.224
2-Feb-17	49:17.0	24.653	93.1	0	0.2109	0	0	289.2	4.224
2-Feb-17	49:17.0	25.234	91.8	0	0.2104	0	0	289.2	4.231
2-Feb-17	49:17.0	25.89	91.7	0	0.2294	0	0	280.8	4.249
3-Feb-17	49:17.0	23.424	96.7	0	0.21	0	0	289.2	4.2
3-Feb-17	49:17.0	32.33	72.6	0	0.2026	0	1.01	169.9	4.327
3-Feb-17	49:17.0	26.598	92.4	0	0.21	0	0.5	300.4	4.255
3-Feb-17	49:17.0	26.158	88.5	0	0.1967	0	0	164.3	4.224
3-Feb-17	49:17.0	26.524	86	0	0.1967	0	0	164.3	4.231
3-Feb-17	49:17.0	27.038	80.7	0	0.1976	0	0	164.3	4.243
3-Feb-17	49:17.0	27.974	78.3	0	0.1981	0	0.5	164.3	4.249
3-Feb-17	49:17.0	28.369	81.3	0	0.1985	0	0	164.3	4.267
3-Feb-17	49:17.0	29.74	76.3	0	0.199	0	0	164.3	4.303
3-Feb-17	49:17.0	30.596	75.6	0	0.1999	0	0	164.3	4.339
3-Feb-17	49:17.0	31.204	72.1	0	0.199	0	1.51	165.7	4.327
3-Feb-17	49:17.0	25.987	89.8	0	0.1963	0	0	164.3	4.218
3-Feb-17	49:17.0	34.413	63.5	0	0.1999	0	2.01	151.6	4.321
3-Feb-17	49:17.0	26.256	90.2	0	0.1958	0	0	164.3	4.212
3-Feb-17	49:17.0	28.468	83.4	0	0.2038	0	2.01	176.9	4.333
3-Feb-17	49:17.0	30.596	78.3	0	0.2047	0	2.01	213.4	4.327
3-Feb-17	49:17.0	30.167	79.8	0	0.207	0	0.5	296.2	4.333
3-Feb-17	49:17.0	28.369	85.3	0	0.2087	0	0.5	313.1	4.339
3-Feb-17	49:17.0	24.557	96.7	0	0.21	0	0	289.2	4.2
3-Feb-17	49:17.0	23.713	96	0	0.21	0	0	289.2	4.206
3-Feb-17	49:17.0	23.857	95.3	0	0.2104	0	0	289.2	4.206
3-Feb-17	49:17.0	24.171	94.6	0	0.2104	0	0	289.2	4.212
3-Feb-17	49:17.0	24.219	94.7	0	0.2104	0	0	289.2	4.218
3-Feb-17	49:17.0	31.868	64	0	0.199	0	3.02	147.4	4.315
4-Feb-17	49:17.0	24.653	96.1	0	0.1904	0	0	181.1	4.267
4-Feb-17	49:17.0	26.573	90.4	0	0.2008	0	0	207.8	4.333
4-Feb-17	49:17.0	27.751	84.9	0	0.1985	0	0	217.6	4.339
4-Feb-17	49:17.0	30.016	75.2	0	0.1963	0	0	221.8	4.351
4-Feb-17	49:17.0	30.571	71.2	0	0.1945	0	0	219	4.327
4-Feb-17	49:17.0	32.124	67	0	0.1926	0	0	345.4	4.321
4-Feb-17	49:17.0	32.639	65	0	0.1913	0	0	200.8	4.363
4-Feb-17	49:17.0	32.047	68	0	0.1908	0	0	199.4	4.345
4-Feb-17	49:17.0	24.581	90.1	5.8	0.1797	0	2.01	182.5	4.291
4-Feb-17	49:17.0	25.477	93.8	0.4	0.183	0	0	181.1	4.297
4-Feb-17	49:17.0	25.72	91.7	0	0.1954	0	0	164.3	4.206
4-Feb-17	49:17.0	25.089	95.4	0	0.1891	0	0	181.1	4.261
4-Feb-17	49:17.0	25.089	96.4	0	0.199	0	0	209.2	4.357
4-Feb-17	49:17.0	24.339	96.2	0.2	0.1923	0	0	181.1	4.237
4-Feb-17	49:17.0	24.026	96.8	0	0.1926	0	0	181.1	4.231
4-Feb-17	49:17.0	24.002	96.9	0	0.1932	0	1.01	207.8	4.224
4-Feb-17	49:17.0	23.905	97.2	0	0.1935	0	0	307.5	4.224
4-Feb-17	49:17.0	23.905	97.5	0	0.1935	0	0	307.5	4.218
4-Feb-17	49:17.0	24.05	96.9	0	0.1935	0	0	209.2	4.206
4-Feb-17	49:17.0	23.208	96.4	0.2	0.1904	0	0	209.2	4.2
4-Feb-17	49:17.0	23.28	95.4	3.2	0.1872	0	3.52	259.7	4.2
4-Feb-17	49:17.0	24.146	94	1.2	0.1963	0	1.51	169.9	4.206
4-Feb-17	49:17.0	25.525	92.6	0	0.1958	0	0	164.3	4.206
4-Feb-17	49:17.0	25.283	94.6	0	0.1872	0	0	181.1	4.273
5-Feb-17	49:17.0	23.256	98.8	0	0.1939	0	0	307.5	4.2
5-Feb-17	49:17.0	32.098	67.3	0	0.1891	0	2.52	342.6	4.327
5-Feb-17	49:17.0	26.549	90.3	0	0.1885	0	0.5	296.2	4.224
5-Feb-17	49:17.0	27.481	89.8	0	0.1895	0	0	294.8	4.231
5-Feb-17	49:17.0	27.702	88.7	0	0.1898	0	0	294.8	4.249
5-Feb-17	49:17.0	28.147	85.5	0	0.1904	0	0	294.8	4.255
5-Feb-17	49:17.0	29.54	80.6	0	0.1913	0	0.5	294.8	4.279
5-Feb-17	49:17.0	31.026	72	0	0.1913	0	1.01	296.2	4.315
5-Feb-17	49:17.0	31.791	67.9	0	0.1908	0	0.5	296.2	4.393
5-Feb-17	49:17.0	33.313	61.9	0	0.1904	0	2.52	338.3	4.351
5-Feb-17	49:17.0	24.944	93.4	0	0.1885	0	0	296.2	4.212
5-Feb-17	49:17.0	34.651	60.7	0	0.1891	0	3.52	315.9	4.333
5-Feb-17	49:17.0	24.75	92.2	0	0.1876	0	0	296.2	4.206
5-Feb-17	49:17.0	31.179	71.8	0	0.1904	0	5.54	0	4.327
5-Feb-17	49:17.0	28.419	79.5	0	0.1923	0	1.51	0	4.333
5-Feb-17	49:17.0	26.524	97.7	0	0.1945	0	0.5	308.9	4.327
5-Feb-17	49:17.0	28.295	90.3	0	0.1935	0	1.51	304.7	4.333
5-Feb-17	49:17.0	23.593	97.9	0	0.1935	0	0	307.5	4.212
5-Feb-17	49:17.0	23.593	98.2	0	0.1939	0	0	307.5	4.206
5-Feb-17	49:17.0	23.617	98.4	0	0.1939	0	0	307.5	4.206
5-Feb-17	49:17.0	23.593	98.7	0	0.1939	0	0	307.5	4.2
5-Feb-17	49:17.0	24.219	99	0	0.1945	0	0	307.5	4.206
5-Feb-17	49:17.0	35.235	56.7	0	0.1898	0	2.01	4.2	4.345
5-Feb-17	49:17.0	25.428	92.9	0	0.1881	0	0	296.2	4.218
6-Feb-17	49:17.0	28.221	87.5	0	0.1866	0	0	160	4.231
6-Feb-17	49:17.0	29.565	76	0	0.1866	0	3.52	327.1	4.333
6-Feb-17	49:17.0	31.612	66.2	0	0.1859	0	2.01	331.3	4.327
6-Feb-17	49:17.0	34.334	58.7	0	0.184	0	1.51	271	4.351
6-Feb-17	49:17.0	35.128	56.6	0	0.1836	0	2.52	200.8	4.339
6-Feb-17	49:17.0	33.887	60.8	0	0.1849	0	1.51	160	4.333
6-Feb-17	49:17.0	36.092	53.9	0	0.1862	0	1.51	162.9	4.333
6-Feb-17	49:17.0	34.545	57.9	0	0.1885	0	1.01	157.2	4.333
6-Feb-17	49:17.0	34.492	62	0	0.1904	0	0	160	4.345
6-Feb-17	49:17.0	30.824	74.1	0	0.1904	0	0	160	4.285
6-Feb-17	49:17.0	24.146	94.5	0	0.1876	0	0	296.2	4.206
6-Feb-17	49:17.0	28.568	83.1	0	0.1885	0	0	160	4.243
6-Feb-17	49:17.0	25.963	91.1	0	0.1876	0	1.01	300.4	4.206
6-Feb-17	49:17.0	27.431	89.9	0	0.1853	0	0	160	4.224
6-Feb-17	49:17.0	27.186	90.3	0	0.184	0	0	161.5	4.218
6-Feb-17	49:17.0	26.475	91.8	0	0.1826	0	0	161.5	4.212
6-Feb-17	49:17.0	26.182	92.8	0	0.182	0	0	161.5	4.206
6-Feb-17	49:17.0	25.623	94.7	0	0.1816	0	0	161.5	4.224
6-Feb-17	49:17.0	24.122	94.8	0	0.1872	0	0	296.2	4.2
6-Feb-17	49:17.0	24.098	94	0	0.1872	0	0	296.2	4.2
6-Feb-17	49:17.0	24.243	95	0	0.1872	0	0	296.2	4.2
6-Feb-17	49:17.0	28.444	83.5	0	0.1866	0	1.51	310.3	4.333
6-Feb-17	49:17.0	24.581	94.6	0	0.1872	0	0	296.2	4.2
6-Feb-17	49:17.0	30.091	77.6	0	0.1904	0	0	160	4.255
7-Feb-17	49:17.0	28.518	82.2	0	0.1813	0	0	60.4	4.267
7-Feb-17	49:17.0	34.81	63.5	0	0.1775	0	2.52	105.3	4.327
7-Feb-17	49:17.0	25.283	95.6	0	0.1813	0	0	161.5	4.2
7-Feb-17	49:17.0	25.065	96.1	0	0.1813	0	0	161.5	4.2
7-Feb-17	49:17.0	24.992	96.7	0	0.1816	0	0	161.5	4.2
7-Feb-17	49:17.0	24.823	96.9	0	0.1807	0	0	161.5	4.2
7-Feb-17	49:17.0	24.581	97.3	0	0.1807	0	0	161.5	4.194
7-Feb-17	49:17.0	25.987	96.9	0	0.1803	0	0.5	237.3	4.2
7-Feb-17	49:17.0	27.53	93.5	0	0.1807	0	0.5	289.2	4.285
7-Feb-17	49:17.0	28.841	86.2	0	0.1807	0	0.5	289.2	4.351
7-Feb-17	49:17.0	32.33	73.4	0	0.1797	0	1.01	287.8	4.345
7-Feb-17	49:17.0	24.653	95.2	1.2	0.304	0	0.5	353.8	4.243
7-Feb-17	49:17.0	35.102	63.9	0	0.1769	0	1.51	193.7	4.339
7-Feb-17	49:17.0	24.002	97.4	0	0.2928	0	0.5	345.4	4.212
7-Feb-17	49:17.0	32.639	67.6	0	0.1793	0	1.51	122.1	4.327
7-Feb-17	49:17.0	32.587	64.1	0	0.182	0	1.01	115.1	4.327
7-Feb-17	49:17.0	31.077	69.1	0.2	0.1826	0	1.01	5.6	4.327
7-Feb-17	49:17.0	31.026	70	0	0.1826	0	1.51	54.8	4.339
7-Feb-17	49:17.0	29.565	75.9	0	0.1816	0	0.5	60.4	4.291
7-Feb-17	49:17.0	24.798	92.9	15.2	0.1742	0	1.01	42.1	4.249
7-Feb-17	49:17.0	24.557	96.1	0.2	0.299	0	0	348.2	4.231
7-Feb-17	49:17.0	24.195	96.8	0.2	0.2963	0	1.01	348.2	4.224
7-Feb-17	49:17.0	24.363	97.2	0	0.2938	0	0	348.2	4.218
7-Feb-17	49:17.0	30.976	73.8	0	0.1779	0	1.51	183.9	4.333
8-Feb-17	49:17.0	24.629	98.6	0	0.2895	0	0	341.2	4.2
8-Feb-17	49:17.0	34.308	58.4	0	0.283	0	2.52	147.4	4.339
8-Feb-17	49:17.0	24.074	97.7	0	0.2919	0	0	341.2	4.212
8-Feb-17	49:17.0	23.761	98	0	0.2908	0	0	341.2	4.206
8-Feb-17	49:17.0	23.617	98.2	0	0.2901	0	0	341.2	4.206
8-Feb-17	49:17.0	23.472	98.4	0	0.2898	0	0	341.2	4.2
8-Feb-17	49:17.0	23.689	98.6	0.2	0.2895	0	0	341.2	4.2
8-Feb-17	49:17.0	26.329	97.9	0	0.2901	0	0.5	341.2	4.206
8-Feb-17	49:17.0	30.343	82.9	0	0.289	0	1.51	176.9	4.339
8-Feb-17	49:17.0	32.51	71.9	0	0.2874	0	2.01	134.8	4.327
8-Feb-17	49:17.0	28.617	90.7	0	0.2901	0	1.51	174.1	4.369
8-Feb-17	49:17.0	33.992	61.1	0	0.2844	0	2.52	148.8	4.363
8-Feb-17	49:17.0	24.557	94.9	0	0.2708	0	0	136.2	4.224
8-Feb-17	49:17.0	34.097	54.7	0	0.2817	0	3.02	148.8	4.321
8-Feb-17	49:17.0	33.914	54.5	0	0.28	0	2.52	160	4.363
8-Feb-17	49:17.0	32.201	59.9	0	0.279	0	2.01	174.1	4.291
8-Feb-17	49:17.0	30.343	68	0	0.277	0	0.5	154.4	4.249
8-Feb-17	49:17.0	28.642	77.8	0	0.2756	0	0	137.6	4.237
8-Feb-17	49:17.0	27.259	85.9	0	0.2746	0	0	137.6	4.224
8-Feb-17	49:17.0	26.329	90.5	0	0.2736	0	0	137.6	4.224
8-Feb-17	49:17.0	25.939	91.9	0	0.2732	0	0	137.6	4.212
8-Feb-17	49:17.0	25.477	92.6	0	0.2726	0	0	136.2	4.206
8-Feb-17	49:17.0	24.968	93.5	0	0.2719	0	0	136.2	4.206
8-Feb-17	49:17.0	33.626	66	0	0.2861	0	2.01	140.4	4.345
9-Feb-17	49:17.0	24.895	97.4	0	0.268	0	0	136.2	4.194
9-Feb-17	49:17.0	31.586	69.7	0	0.2553	0	1.51	160	4.321
9-Feb-17	49:17.0	25.817	97.5	0	0.2677	0	0	136.2	4.2
9-Feb-17	49:17.0	26.965	95.6	0	0.2677	0	0	136.2	4.261
9-Feb-17	49:17.0	25.501	89.9	0	0.2494	0	0	84.2	4.212
9-Feb-17	49:17.0	32.872	69.2	0	0.2632	0	1.51	126.4	4.327
9-Feb-17	49:17.0	34.019	65.6	0	0.2611	0	1.51	144.6	4.339
9-Feb-17	49:17.0	35.582	61.2	0	0.2596	0	2.01	147.4	4.321
9-Feb-17	49:17.0	33.861	66.3	0	0.2582	0	2.52	171.3	4.333
9-Feb-17	49:17.0	24.315	97.3	0	0.2687	0	0	136.2	4.2
9-Feb-17	49:17.0	33.417	64.8	0	0.2564	0	2.52	160	4.321
9-Feb-17	49:17.0	28.717	85.9	0	0.2664	0	0.5	154.4	4.339
9-Feb-17	49:17.0	31.357	67	0	0.2538	0	1.51	165.7	4.327
9-Feb-17	49:17.0	29.565	76.1	0	0.2532	0	1.01	189.5	4.279
9-Feb-17	49:17.0	28.493	78.9	0	0.2524	0	0	189.5	4.255
9-Feb-17	49:17.0	24.339	95.7	0	0.2701	0	0	136.2	4.2
9-Feb-17	49:17.0	28.766	76	0	0.2516	0	2.01	183.9	4.243
9-Feb-17	49:17.0	27.974	78.4	0	0.2509	0	1.51	144.6	4.231
9-Feb-17	49:17.0	26.891	83.2	0	0.2502	0	3.02	124.9	4.224
9-Feb-17	49:17.0	25.987	87.8	0	0.2498	0	1.01	94.1	4.218
9-Feb-17	49:17.0	32.51	65.5	0	0.2571	0	3.02	139	4.327
9-Feb-17	49:17.0	24.195	96.4	0	0.2698	0	0	136.2	4.2
9-Feb-17	49:17.0	23.978	96.7	0	0.2691	0	0	136.2	4.2
9-Feb-17	49:17.0	29.916	79.4	0	0.2653	0	0.5	186.7	4.333
10-Feb-17	49:17.0	31.612	62.4	0	0.2257	0	3.52	154.4	4.339
10-Feb-17	49:17.0	25.137	92.4	0	0.249	0	0	78.6	4.206
10-Feb-17	49:17.0	25.162	93.8	0	0.2483	0	0	78.6	4.206
10-Feb-17	49:17.0	25.234	93.9	0	0.2479	0	0.5	78.6	4.2
10-Feb-17	49:17.0	25.186	94.7	0	0.2475	0	0	78.6	4.2
10-Feb-17	49:17.0	25.234	95	0	0.2471	0	0	78.6	4.224
10-Feb-17	49:17.0	28.444	83.5	0	0.2445	0	1.01	189.5	4.333
10-Feb-17	49:17.0	30.722	73.6	0	0.2418	0	2.52	151.6	4.339
10-Feb-17	49:17.0	31.484	69.3	0	0.2387	0	1.51	162.9	4.333
10-Feb-17	49:17.0	35.475	59.4	0	0.2355	0	2.52	150.2	4.321
10-Feb-17	49:17.0	36.039	55.7	0	0.2318	0	2.52	150.2	4.345
10-Feb-17	49:17.0	34.73	55.8	0	0.2303	0	3.02	155.8	4.321
10-Feb-17	49:17.0	31.816	60	0	0.2282	0	3.52	155.8	4.321
10-Feb-17	49:17.0	30.773	63	0	0.2232	0	3.52	155.8	4.309
10-Feb-17	49:17.0	28.891	70.7	0	0.2185	0	0.5	171.3	4.273
10-Feb-17	49:17.0	27.702	74.8	0	0.2177	0	0	174.1	4.255
10-Feb-17	49:17.0	26.769	79.7	0	0.2164	0	0	169.9	4.243
10-Feb-17	49:17.0	25.793	83.8	0	0.2148	0	0	168.5	4.231
10-Feb-17	49:17.0	26.061	93.5	0	0.2468	0	1.01	87	4.206
10-Feb-17	49:17.0	25.283	85.7	0	0.2134	0	0.5	168.5	4.224
10-Feb-17	49:17.0	24.146	90.8	0	0.2126	0	0	168.5	4.218
10-Feb-17	49:17.0	24.581	91.5	0	0.2122	0	0	168.5	4.212
10-Feb-17	49:17.0	27.136	88.2	0	0.246	0	1.01	141.8	4.285
10-Feb-17	49:17.0	33.992	56.4	0	0.2303	0	3.02	151.6	4.309
11-Feb-17	49:17.0	23.545	92.6	14.2	0.1913	0	1.51	43.5	4.249
11-Feb-17	49:17.0	35.877	52.4	0	0.1939	0	2.01	129.2	4.333
11-Feb-17	49:17.0	24.122	92.6	0	0.2117	0	0	167.1	4.206
11-Feb-17	49:17.0	23.954	93.9	0	0.2122	0	0	167.1	4.206
11-Feb-17	49:17.0	23.954	94.7	0	0.2112	0	0	167.1	4.206
11-Feb-17	49:17.0	23.593	95.5	0	0.2112	0	0	167.1	4.2
11-Feb-17	49:17.0	23.785	96.1	0	0.2109	0	0	167.1	4.2
11-Feb-17	49:17.0	25.307	95.9	0	0.2109	0	0.5	167.1	4.2
11-Feb-17	49:17.0	27.161	90	0	0.2104	0	0.5	168.5	4.273
11-Feb-17	49:17.0	28.369	85.3	0	0.2087	0	0	168.5	4.345
11-Feb-17	49:17.0	31.052	72.4	0	0.2047	0	1.51	179.7	4.339
11-Feb-17	49:17.0	24.026	95.6	0	0.2715	0	0	307.5	4.224
11-Feb-17	49:17.0	34.202	56.3	0	0.1972	0	2.01	209.2	4.333
11-Feb-17	49:17.0	24.823	96.9	0	0.2736	0	0	306.1	4.206
11-Feb-17	49:17.0	37.069	47.9	0	0.1926	0	2.01	127.8	4.315
11-Feb-17	49:17.0	35.958	49.5	0	0.1932	0	1.51	139	4.333
11-Feb-17	49:17.0	31.586	66	0	0.1935	0	1.01	134.8	4.315
11-Feb-17	49:17.0	30.217	70	0	0.1932	0	0	146	4.285
11-Feb-17	49:17.0	27.186	78.3	0	0.1926	0	1.51	203.6	4.255
11-Feb-17	49:17.0	23.737	94.6	0.2	0.2673	0	0	306.1	4.237
11-Feb-17	49:17.0	24.291	96.2	0	0.2719	0	0	306.1	4.224
11-Feb-17	49:17.0	24.605	96.6	0	0.2722	0	0	306.1	4.212
11-Feb-17	49:17.0	24.823	96.9	0	0.2729	0	0	306.1	4.206
11-Feb-17	49:17.0	33.001	64.5	0	0.2008	0	1.51	179.7	4.321
12-Feb-17	49:17.0	25.283	96	0	0.2715	0	0	345.4	4.285
12-Feb-17	49:17.0	33.053	67.3	0	0.2722	0	1.51	300.4	4.333
12-Feb-17	49:17.0	24.532	97	0	0.2722	0	0	345.4	4.255
12-Feb-17	49:17.0	23.978	97.2	0	0.2726	0	0	345.4	4.237
12-Feb-17	49:17.0	24.171	97.1	0	0.2726	0	0.5	345.4	4.303
12-Feb-17	49:17.0	25.501	96.7	0	0.2715	0	0.5	345.4	4.267
12-Feb-17	49:17.0	25.598	95.1	0	0.2708	0	0	345.4	4.303
12-Feb-17	49:17.0	26.036	94.7	0.4	0.2673	0	0	345.4	4.333
12-Feb-17	49:17.0	25.04	94.2	0.2	0.266	0	0	345.4	4.255
12-Feb-17	49:17.0	24.363	92.1	0.6	0.2642	0	0	345.4	4.267
12-Feb-17	49:17.0	24.363	82.7	2	0.2639	0	3.02	22.5	4.297
12-Feb-17	49:17.0	24.243	97.6	0	0.2726	0	0	345.4	4.224
12-Feb-17	49:17.0	34.836	58.1	0	0.2708	0	1.51	289.2	4.345
12-Feb-17	49:17.0	24.122	97.5	0	0.2729	0	0	345.4	4.224
12-Feb-17	49:17.0	31.026	77.6	0	0.2732	0	1.01	329.9	4.333
12-Feb-17	49:17.0	28.32	88.6	0	0.2739	0	0.5	296.2	4.333
12-Feb-17	49:17.0	27.186	96.9	0.2	0.2746	0	0	306.1	4.351
12-Feb-17	49:17.0	25.477	98.4	0	0.2743	0	0	306.1	4.224
12-Feb-17	49:17.0	24.508	98.4	0	0.2729	0	0	306.1	4.2
12-Feb-17	49:17.0	24.05	98	0	0.2729	0	0	306.1	4.2
12-Feb-17	49:17.0	24.339	97.8	0	0.2732	0	0	306.1	4.2
12-Feb-17	49:17.0	24.798	97.6	0	0.2732	0	0	306.1	4.2
12-Feb-17	49:17.0	24.629	97.4	0	0.2736	0	0	306.1	4.2
12-Feb-17	49:17.0	35.555	51.6	0	0.2708	0	1.51	293.4	4.339
13-Feb-17	49:17.0	25.695	95.2	0	0.2618	0	0	342.6	4.249
13-Feb-17	49:17.0	28.196	93.6	0	0.2719	0	0.5	345.4	4.345
13-Feb-17	49:17.0	31.026	82	0	0.2708	0	0.5	8.4	4.351
13-Feb-17	49:17.0	33.365	69.8	0	0.2694	0	1.51	214.8	4.333
13-Feb-17	49:17.0	35.797	57.2	0	0.2677	0	1.01	189.5	4.387
13-Feb-17	49:17.0	33.287	66.7	0	0.267	0	0.5	154.4	4.363
13-Feb-17	49:17.0	30.798	71.5	0	0.2664	0	1.51	109.5	4.363
13-Feb-17	49:17.0	30.419	75.4	0	0.265	0	1.51	293.4	4.351
13-Feb-17	49:17.0	29.79	73.7	0	0.2635	0	1.51	344	4.333
13-Feb-17	49:17.0	27.85	84.5	0.2	0.2628	0	0.5	344	4.339
13-Feb-17	49:17.0	27.112	88.1	0	0.2628	0	0	344	4.297
13-Feb-17	49:17.0	24.05	97.9	0	0.2726	0	0	345.4	4.218
13-Feb-17	49:17.0	25.817	93.9	0	0.2621	0	0	342.6	4.255
13-Feb-17	49:17.0	26.304	98.3	0	0.2726	0	0	345.4	4.363
13-Feb-17	49:17.0	25.428	93.2	0	0.2618	0	0.5	342.6	4.237
13-Feb-17	49:17.0	25.234	92.9	0	0.2611	0	0	342.6	4.231
13-Feb-17	49:17.0	24.847	94.7	0	0.2604	0	0	342.6	4.224
13-Feb-17	49:17.0	24.605	95.9	0	0.2607	0	0	342.6	4.218
13-Feb-17	49:17.0	24.75	99.1	0	0.2722	0	0	345.4	4.218
13-Feb-17	49:17.0	24.05	98.9	0	0.2722	0	0	345.4	4.2
13-Feb-17	49:17.0	24.146	98.8	0	0.2726	0	0	345.4	4.2
13-Feb-17	49:17.0	24.267	98.6	0	0.2726	0	0	345.4	4.206
13-Feb-17	49:17.0	24.436	98.3	0	0.2726	0	0	345.4	4.212
13-Feb-17	49:17.0	25.866	92.1	0	0.2628	0	1.01	342.6	4.273
14-Feb-17	49:17.0	24.315	98.5	0	0.2592	0	0	342.6	4.2
14-Feb-17	49:17.0	23.809	95.3	1	0.2358	0	0	341.2	4.255
14-Feb-17	49:17.0	23.833	98	0	0.2596	0	0	342.6	4.2
14-Feb-17	49:17.0	23.665	98.2	0	0.2592	0	0	342.6	4.2
14-Feb-17	49:17.0	29.115	83.9	0	0.2564	0	0	342.6	4.351
14-Feb-17	49:17.0	34.255	62.7	0	0.2512	0	0	342.6	4.351
14-Feb-17	49:17.0	35.582	59.8	0	0.249	0	0.5	342.6	4.345
14-Feb-17	49:17.0	33.966	62.9	0	0.2464	0	1.01	342.6	4.339
14-Feb-17	49:17.0	32.665	67.4	0	0.2452	0	1.51	342.6	4.339
14-Feb-17	49:17.0	24.074	97.7	0	0.2596	0	0	342.6	4.206
14-Feb-17	49:17.0	23.184	93.4	5.6	0.2355	0	3.52	344	4.267
14-Feb-17	49:17.0	26.061	97.7	0	0.2592	0	0	342.6	4.249
14-Feb-17	49:17.0	23.641	96.3	1.8	0.2371	0	1.01	341.2	4.249
14-Feb-17	49:17.0	24.146	97	0	0.2383	0	0.5	339.7	4.237
14-Feb-17	49:17.0	24.339	97.3	0	0.2445	0	1.01	339.7	4.224
14-Feb-17	49:17.0	27.974	89.3	0	0.2579	0	0	342.6	4.345
14-Feb-17	49:17.0	24.363	97.4	0	0.2512	0	1.51	342.6	4.224
14-Feb-17	49:17.0	24.195	97.5	0	0.256	0	2.52	339.7	4.218
14-Feb-17	49:17.0	24.098	97.4	0	0.2589	0	1.01	338.3	4.212
14-Feb-17	49:17.0	23.809	97.7	0	0.2607	0	0	338.3	4.206
14-Feb-17	49:17.0	27.653	73.2	0	0.2434	0	3.02	342.6	4.333
14-Feb-17	49:17.0	24.46	96.7	0	0.26	0	0.5	342.6	4.212
14-Feb-17	49:17.0	24.243	97.3	0	0.2596	0	0.5	342.6	4.206
14-Feb-17	49:17.0	31.077	71	0	0.2538	0	0.5	342.6	4.363
15-Feb-17	49:17.0	34.836	55.3	0	0.2567	0	1.51	292	4.303
15-Feb-17	49:17.0	23.641	98.4	0.2	0.2624	0	0	338.3	4.2
15-Feb-17	49:17.0	23.617	98.7	0	0.2632	0	0	338.3	4.2
15-Feb-17	49:17.0	23.521	98.9	0	0.2639	0	0	338.3	4.2
15-Feb-17	49:17.0	23.376	99	0	0.2642	0	0	338.3	4.2
15-Feb-17	49:17.0	24.171	99.1	0	0.265	0	0	338.3	4.194
15-Feb-17	49:17.0	28.023	92.9	0	0.2653	0	1.51	341.2	4.357
15-Feb-17	49:17.0	28.543	88.6	0	0.2646	0	0	341.2	4.351
15-Feb-17	49:17.0	29.79	82	0	0.2639	0	1.51	341.2	4.345
15-Feb-17	49:17.0	33.574	73.1	0	0.2624	0	1.51	339.7	4.339
15-Feb-17	49:17.0	34.916	66.8	0	0.2607	0	2.01	338.3	4.333
15-Feb-17	49:17.0	35.208	58.6	0	0.2589	0	3.02	336.9	4.327
15-Feb-17	49:17.0	35.743	54.6	0	0.2571	0	2.01	334.1	4.327
15-Feb-17	49:17.0	33.339	60	0	0.2557	0	0.5	268.1	4.321
15-Feb-17	49:17.0	27.825	71.3	0	0.2553	0	5.03	0	4.261
15-Feb-17	49:17.0	26.451	76.9	0	0.255	0	0.5	2.8	4.249
15-Feb-17	49:17.0	25.914	81.3	0	0.2546	0	0	355.2	4.237
15-Feb-17	49:17.0	25.113	87	0	0.2546	0	0	308.9	4.224
15-Feb-17	49:17.0	24.75	90.7	0	0.2538	0	0	308.9	4.224
15-Feb-17	49:17.0	24.195	92.8	0	0.2534	0	0	308.9	4.212
15-Feb-17	49:17.0	23.881	98.3	0	0.2618	0	1.01	338.3	4.206
15-Feb-17	49:17.0	24.219	94.3	0	0.2532	0	0	308.9	4.206
15-Feb-17	49:17.0	24.026	94.9	0	0.2528	0	0	308.9	4.206
15-Feb-17	49:17.0	26.353	97.8	0	0.2653	0	1.51	338.3	4.267
16-Feb-17	49:17.0	28.394	78.8	0	0.2306	0	0	195.1	4.249
16-Feb-17	49:17.0	36.389	52.5	0	0.2371	0	2.01	339.7	4.333
16-Feb-17	49:17.0	23.809	95.6	0	0.2524	0	0	308.9	4.2
16-Feb-17	49:17.0	23.905	96.3	0	0.252	0	0	308.9	4.2
16-Feb-17	49:17.0	23.785	96.8	0	0.2516	0	0	308.9	4.2
16-Feb-17	49:17.0	23.761	97.2	0	0.2516	0	0	308.9	4.2
16-Feb-17	49:17.0	23.737	97.6	0	0.2516	0	0	308.9	4.2
16-Feb-17	49:17.0	24.823	97.7	0	0.2512	0	0	308.9	4.2
16-Feb-17	49:17.0	26.891	90.8	0	0.2509	0	0	308.9	4.249
16-Feb-17	49:17.0	29.165	80.8	0	0.2487	0	0	308.9	4.345
16-Feb-17	49:17.0	31.97	69.8	0	0.2464	0	1.51	306.1	4.339
16-Feb-17	49:17.0	27.235	79.7	0	0.2277	0	0	195.1	4.224
16-Feb-17	49:17.0	35.368	53.5	0	0.2399	0	2.52	0	4.339
16-Feb-17	49:17.0	23.304	94.1	0	0.2241	0	0	193.7	4.206
16-Feb-17	49:17.0	36.769	50.4	0	0.2347	0	2.52	16.8	4.321
16-Feb-17	49:17.0	38.588	44.8	0	0.233	0	1.01	339.7	4.393
16-Feb-17	49:17.0	30.318	61.8	0	0.2347	0	2.52	314.5	4.279
16-Feb-17	49:17.0	30.369	67.4	0	0.2339	0	0.5	195.1	4.285
16-Feb-17	49:17.0	30.217	71.4	0	0.2318	0	0.5	195.1	4.267
16-Feb-17	49:17.0	27.653	83.9	0	0.2294	0	0	195.1	4.237
16-Feb-17	49:17.0	26.329	82.3	0	0.2274	0	0	195.1	4.218
16-Feb-17	49:17.0	26.329	83.1	0	0.2262	0	0	195.1	4.212
16-Feb-17	49:17.0	23.713	92.4	3	0.2219	0	0	195.1	4.206
16-Feb-17	49:17.0	34.942	57.9	0	0.243	0	3.02	352.4	4.339
17-Feb-17	49:17.0	26.109	90.4	0	0.2026	0	0	157.2	4.237
17-Feb-17	49:17.0	27.407	81.1	0	0.2043	0	0	157.2	4.273
17-Feb-17	49:17.0	23.184	95.1	0	0.2245	0	0	193.7	4.218
17-Feb-17	49:17.0	27.038	85.9	0	0.2035	0	0	157.2	4.255
17-Feb-17	49:17.0	24.653	94.9	0	0.2012	0	0	157.2	4.206
17-Feb-17	49:17.0	24.508	94	0	0.2012	0	0.5	157.2	4.212
17-Feb-17	49:17.0	25.477	93.8	0	0.2017	0	0.5	157.2	4.218
17-Feb-17	49:17.0	26.5	87	0	0.2026	0	0	157.2	4.249
17-Feb-17	49:17.0	29.09	76.9	0	0.2064	0	1.01	157.2	4.315
17-Feb-17	49:17.0	30.091	68.5	0	0.2078	0	2.01	137.6	4.363
17-Feb-17	49:17.0	31.842	65.9	0	0.2095	0	2.01	120.7	4.375
17-Feb-17	49:17.0	32.15	64.3	0	0.2112	0	1.51	73	4.345
17-Feb-17	49:17.0	23.04	96.9	0	0.2257	0	0	193.7	4.2
17-Feb-17	49:17.0	25.695	92.1	0	0.202	0	0	157.2	4.224
17-Feb-17	49:17.0	23.04	96.5	0.2	0.2254	0	0	193.7	4.2
17-Feb-17	49:17.0	34.176	55.4	0	0.2126	0	1.51	198	4.351
17-Feb-17	49:17.0	23.04	97.2	0	0.2257	0	0	193.7	4.194
17-Feb-17	49:17.0	23.761	97.6	0	0.2257	0	0	193.7	4.194
17-Feb-17	49:17.0	25.307	95.1	0	0.2249	0	0	195.1	4.357
17-Feb-17	49:17.0	27.038	87.6	0	0.2232	0	1.01	195.1	4.345
17-Feb-17	49:17.0	30.041	78.6	0	0.2208	0	1.51	196.5	4.339
17-Feb-17	49:17.0	32.794	65.1	0	0.2164	0	1.51	196.5	4.327
17-Feb-17	49:17.0	24.919	96.8	0	0.2257	0	1.01	195.1	4.291
17-Feb-17	49:17.0	22.992	95.9	0	0.2249	0	0	193.7	4.2
18-Feb-17	49:17.0	24.677	92.5	0	0.1765	0	0	179.7	4.2
18-Feb-17	49:17.0	35.395	55.3	0	0.1945	0	2.01	144.6	4.333
18-Feb-17	49:17.0	32.304	61.6	0	0.1945	0	1.51	144.6	4.333
18-Feb-17	49:17.0	32.82	56.1	0	0.1926	0	2.01	154.4	4.297
18-Feb-17	49:17.0	30.925	62.3	0	0.1913	0	2.52	158.6	4.255
18-Feb-17	49:17.0	28.518	70.6	0	0.1904	0	0	181.1	4.243
18-Feb-17	49:17.0	26.524	84.6	0	0.1849	0	0	179.7	4.224
18-Feb-17	49:17.0	25.477	90.5	0	0.1779	0	0	179.7	4.206
18-Feb-17	49:17.0	27.087	80.7	0	0.1885	0	0	179.7	4.231
18-Feb-17	49:17.0	34.651	58.7	0	0.1923	0	2.52	171.3	4.339
18-Feb-17	49:17.0	25.574	90.2	0	0.1793	0	0	179.7	4.206
18-Feb-17	49:17.0	23.641	96	0	0.2003	0	0	157.2	4.194
18-Feb-17	49:17.0	34.942	58.8	0	0.1913	0	2.52	165.7	4.345
18-Feb-17	49:17.0	25.695	87.5	0	0.182	0	0	179.7	4.218
18-Feb-17	49:17.0	24.363	96.5	0	0.2008	0	0	157.2	4.2
18-Feb-17	49:17.0	24.557	95.8	0	0.2012	0	0	157.2	4.2
18-Feb-17	49:17.0	24.412	96.1	0	0.2008	0	0	157.2	4.2
18-Feb-17	49:17.0	24.484	95.2	0	0.2012	0	0	157.2	4.206
18-Feb-17	49:17.0	24.702	94.5	0	0.2003	0	0.5	157.2	4.285
18-Feb-17	49:17.0	25.065	92.1	0	0.2003	0	1.01	155.8	4.333
18-Feb-17	49:17.0	28.023	84.1	0	0.199	0	2.01	154.4	4.339
18-Feb-17	49:17.0	31.637	71.1	0	0.1958	0	1.01	160	4.327
18-Feb-17	49:17.0	33.914	62.8	0	0.1926	0	2.01	160	4.351
18-Feb-17	49:17.0	23.93	96.5	0	0.2008	0	0	157.2	4.2
19-Feb-17	49:17.0	28.345	71.7	0	0.1728	0	0	165.7	4.237
19-Feb-17	49:17.0	33.835	55.5	0	0.1752	0	2.52	154.4	4.351
19-Feb-17	49:17.0	32.175	55.9	0	0.1746	0	3.02	164.3	4.285
19-Feb-17	49:17.0	30.545	61.8	0	0.1738	0	1.51	167.1	4.249
19-Feb-17	49:17.0	26.744	76.5	0	0.1714	0	0	165.7	4.224
19-Feb-17	49:17.0	25.38	84	0	0.1681	0	0	165.7	4.224
19-Feb-17	49:17.0	24.823	86.2	0	0.1642	0	0	165.7	4.212
19-Feb-17	49:17.0	24.195	88.4	0	0.1619	0	0.5	165.7	4.206
19-Feb-17	49:17.0	23.04	92.9	0	0.159	0	0	165.7	4.2
19-Feb-17	49:17.0	34.969	54.5	0	0.1695	0	2.01	141.8	4.321
19-Feb-17	49:17.0	23.593	90.9	0	0.1604	0	0	165.7	4.218
19-Feb-17	49:17.0	24.46	95.7	0	0.1746	0	0.5	176.9	4.194
19-Feb-17	49:17.0	34.097	54.6	0	0.1752	0	2.52	148.8	4.339
19-Feb-17	49:17.0	33.027	58.3	0	0.1724	0	3.02	164.3	4.321
19-Feb-17	49:17.0	24.267	95.2	0	0.1746	0	0	179.7	4.2
19-Feb-17	49:17.0	24.726	93.1	0	0.1756	0	0.5	179.7	4.2
19-Feb-17	49:17.0	25.162	95.5	0	0.1746	0	0.5	151.6	4.194
19-Feb-17	49:17.0	25.38	95.2	0	0.1742	0	1.01	154.4	4.188
19-Feb-17	49:17.0	26.426	92.8	0	0.1746	0	1.01	154.4	4.249
19-Feb-17	49:17.0	27.235	88.2	0	0.1746	0	1.01	154.4	4.339
19-Feb-17	49:17.0	31.255	74.7	0	0.1732	0	2.01	150.2	4.357
19-Feb-17	49:17.0	33.027	61.7	0	0.1709	0	1.51	134.8	4.351
19-Feb-17	49:17.0	34.281	57.2	0	0.1689	0	2.52	143.2	4.339
19-Feb-17	49:17.0	24.291	94.1	0	0.1752	0	0	179.7	4.2
20-Feb-17	49:17.0	25.768	80.1	0	0.1615	0	0	181.1	4.231
20-Feb-17	49:17.0	33.626	49.3	0	0.1629	0	2.01	140.4	4.381
20-Feb-17	49:17.0	32.253	50.7	0	0.1638	0	1.51	127.8	4.291
20-Feb-17	49:17.0	30.748	56.2	0	0.1629	0	3.02	165.7	4.261
20-Feb-17	49:17.0	27.358	71.5	0	0.1623	0	1.01	181.1	4.243
20-Feb-17	49:17.0	24.653	84.5	0	0.1596	0	0	181.1	4.224
20-Feb-17	49:17.0	24.026	85.6	0	0.1551	0	0	182.5	4.218
20-Feb-17	49:17.0	23.208	88.6	0	0.1519	0	0	182.5	4.212
20-Feb-17	49:17.0	22.345	90.6	0	0.1495	0	0	182.5	4.206
20-Feb-17	49:17.0	22.345	91.6	0	0.1479	0	0	182.5	4.206
20-Feb-17	49:17.0	35.77	45.8	0	0.1623	0	2.52	133.4	4.339
20-Feb-17	49:17.0	27.112	89.3	0	0.1562	0	1.51	164.3	4.249
20-Feb-17	49:17.0	23.016	95.4	0	0.157	0	0	165.7	4.2
20-Feb-17	49:17.0	31.382	69.1	0	0.1547	0	2.01	160	4.333
20-Feb-17	49:17.0	22.705	95.9	0	0.157	0	0	165.7	4.194
20-Feb-17	49:17.0	22.8	96.3	0	0.1566	0	0	165.7	4.188
20-Feb-17	49:17.0	24.581	95.9	0	0.1566	0	0.5	167.1	4.2
20-Feb-17	49:17.0	23.064	94.8	0	0.1581	0	0	165.7	4.2
20-Feb-17	49:17.0	23.136	94	0	0.1585	0	0	165.7	4.2
20-Feb-17	49:17.0	32.458	62.3	0	0.1538	0	2.01	175.5	4.327
20-Feb-17	49:17.0	32.587	56.4	0	0.1523	0	1.51	130.6	4.321
20-Feb-17	49:17.0	35.128	49.1	0	0.1547	0	2.52	132	4.339
20-Feb-17	49:17.0	28.568	81.7	0	0.1558	0	2.52	162.9	4.339
20-Feb-17	49:17.0	35.77	46.4	0	0.1581	0	2.01	139	4.339
21-Feb-17	49:17.0	22.274	90.4	0	0.1421	0	0.5	54.8	4.2
21-Feb-17	49:17.0	33.183	45.7	0	0.1558	0	2.01	130.6	4.291
21-Feb-17	49:17.0	30.722	53.9	0	0.1558	0	0.5	106.7	4.249
21-Feb-17	49:17.0	27.456	69.6	0	0.1558	0	0	106.7	4.231
21-Feb-17	49:17.0	26.036	77.4	0	0.1551	0	0	106.7	4.224
21-Feb-17	49:17.0	25.016	81.1	0	0.1527	0	0.5	103.9	4.218
21-Feb-17	49:17.0	23.569	85.2	0	0.1503	0	0	54.8	4.212
21-Feb-17	49:17.0	22.681	88.8	0	0.1441	0	0	54.8	4.206
21-Feb-17	49:17.0	36.688	39.1	0	0.1538	0	1.51	147.4	4.321
21-Feb-17	49:17.0	38.254	35.7	0	0.149	0	2.01	77.2	4.339
21-Feb-17	49:17.0	23.136	86.9	0	0.147	0	0	54.8	4.206
21-Feb-17	49:17.0	21.461	94.4	0	0.1459	0	0	182.5	4.2
21-Feb-17	49:17.0	21.843	92.7	0	0.1475	0	0	182.5	4.2
21-Feb-17	49:17.0	35.102	41.2	0	0.1551	0	1.51	169.9	4.375
21-Feb-17	49:17.0	21.843	93.8	0	0.1459	0	0	182.5	4.2
21-Feb-17	49:17.0	21.199	94.9	0	0.145	0	0	182.5	4.2
21-Feb-17	49:17.0	21.032	95.4	0	0.1446	0	0	182.5	4.194
21-Feb-17	49:17.0	22.896	95.2	0	0.1441	0	0.5	195.1	4.188
21-Feb-17	49:17.0	27.481	81.6	0	0.1441	0	1.01	285	4.345
21-Feb-17	49:17.0	30.798	71.8	0	0.1434	0	1.51	182.5	4.333
21-Feb-17	49:17.0	33.992	57	0	0.1421	0	1.01	162.9	4.351
21-Feb-17	49:17.0	35.128	50.5	0	0.143	0	1.51	245.7	4.351
21-Feb-17	49:17.0	37.124	43.8	0	0.145	0	2.01	136.2	4.381
21-Feb-17	49:17.0	25.744	89.1	0	0.1441	0	1.01	279.4	4.303
22-Feb-17	49:17.0	23.713	83.5	0	0.1421	0	0	182.5	4.2
22-Feb-17	49:17.0	35.985	39.7	0	0.1499	0	2.01	157.2	4.321
22-Feb-17	49:17.0	34.229	42.4	0	0.1514	0	2.52	161.5	4.267
22-Feb-17	49:17.0	31.816	49.1	0	0.1514	0	1.51	160	4.237
22-Feb-17	49:17.0	28.196	64.7	0	0.1514	0	0	181.1	4.224
22-Feb-17	49:17.0	26.256	73	0	0.1508	0	0	181.1	4.212
22-Feb-17	49:17.0	25.355	78.4	0	0.1503	0	0	181.1	4.206
22-Feb-17	49:17.0	23.256	86	0	0.14	0	0.5	182.5	4.2
22-Feb-17	49:17.0	24.677	80.7	0	0.1459	0	0.5	182.5	4.2
22-Feb-17	49:17.0	35.931	39.5	0	0.1503	0	1.51	151.6	4.321
22-Feb-17	49:17.0	21.604	91.6	0	0.1412	0	0	53.3	4.2
22-Feb-17	49:17.0	24.557	81.3	0	0.1484	0	0.5	182.5	4.206
22-Feb-17	49:17.0	20.746	94.7	0	0.1382	0	0	53.3	4.194
22-Feb-17	49:17.0	20.936	94	0	0.1396	0	0.5	53.3	4.2
22-Feb-17	49:17.0	39.065	34.1	0	0.145	0	2.01	318.7	4.327
22-Feb-17	49:17.0	20.817	94.2	0	0.1387	0	0.5	53.3	4.194
22-Feb-17	49:17.0	22.633	93.8	0	0.137	0	0.5	36.5	4.188
22-Feb-17	49:17.0	25.55	85.9	0	0.137	0	1.01	315.9	4.188
22-Feb-17	49:17.0	29.24	74.8	0	0.137	0	1.51	307.5	4.224
22-Feb-17	49:17.0	32.768	59	0	0.1366	0	3.02	321.5	4.369
22-Feb-17	49:17.0	35.555	47	0	0.1361	0	3.02	325.7	4.321
22-Feb-17	49:17.0	37.015	40.5	0	0.1361	0	2.52	321.5	4.375
22-Feb-17	49:17.0	38.004	34.8	0	0.1396	0	2.01	321.5	4.333
22-Feb-17	49:17.0	21.318	92.9	0	0.1396	0	0	53.3	4.2
23-Feb-17	49:17.0	26.231	85.6	0	0.1335	0	1.01	188.1	4.188
23-Feb-17	49:17.0	29.615	66.2	0	0.1475	0	0	317.3	4.218
23-Feb-17	49:17.0	35.448	46.4	0	0.1475	0	2.52	165.7	4.345
23-Feb-17	49:17.0	34.124	49.9	0	0.1475	0	2.01	172.7	4.273
23-Feb-17	49:17.0	32.613	53.3	0	0.1475	0	0.5	171.3	4.243
23-Feb-17	49:17.0	30.571	62	0	0.1475	0	2.01	314.5	4.224
23-Feb-17	49:17.0	28.99	65.6	0	0.147	0	1.51	321.5	4.206
23-Feb-17	49:17.0	27.949	71.1	0	0.1466	0	0	346.8	4.206
23-Feb-17	49:17.0	26.549	76.6	0	0.1446	0	1.01	329.9	4.2
23-Feb-17	49:17.0	25.574	80.6	0	0.143	0	0.5	355.2	4.224
23-Feb-17	49:17.0	38.449	38.2	0	0.1459	0	2.52	144.6	4.339
23-Feb-17	49:17.0	25.21	83.5	0	0.14	0	0	353.8	4.2
23-Feb-17	49:17.0	22.226	90	0	0.1357	0	0	182.5	4.194
23-Feb-17	49:17.0	38.84	40.7	0	0.1425	0	2.01	174.1	4.333
23-Feb-17	49:17.0	21.963	90.2	0	0.1357	0	0	182.5	4.188
23-Feb-17	49:17.0	21.533	91.9	0	0.1342	0	0	182.5	4.188
23-Feb-17	49:17.0	23.448	91.8	0	0.1342	0	0	182.5	4.188
23-Feb-17	49:17.0	22.8	87.8	0	0.137	0	0	182.5	4.194
23-Feb-17	49:17.0	22.944	86.6	0	0.1382	0	0.5	182.5	4.2
23-Feb-17	49:17.0	36.987	49.2	0	0.1326	0	1.51	276.6	4.393
23-Feb-17	49:17.0	37.949	45.9	0	0.1342	0	1.51	320.1	4.315
23-Feb-17	49:17.0	37.343	43.9	0	0.137	0	1.51	158.6	4.351
23-Feb-17	49:17.0	29.389	75.7	0	0.1335	0	1.01	278	4.206
23-Feb-17	49:17.0	32.639	63.3	0	0.1326	0	2.01	262.5	4.363
24-Feb-17	49:17.0	24.363	98.3	0	0.256	0	0	345.4	4.212
24-Feb-17	49:17.0	23.833	87.2	11.2	0.1396	0	3.02	112.3	4.291
24-Feb-17	49:17.0	25.21	94	0.4	0.147	0	1.01	275.2	4.297
24-Feb-17	49:17.0	25.04	95.6	0	0.2269	0	0.5	278	4.273
24-Feb-17	49:17.0	24.798	96.1	0	0.2468	0	1.01	345.4	4.255
24-Feb-17	49:17.0	24.992	96.8	0	0.2516	0	0	345.4	4.249
24-Feb-17	49:17.0	24.774	97.2	0	0.2542	0	0	345.4	4.237
24-Feb-17	49:17.0	24.605	97.9	0	0.2557	0	0	345.4	4.231
24-Feb-17	49:17.0	31.103	85.7	0.4	0.1405	0	1.01	255.5	4.339
24-Feb-17	49:17.0	28.568	92	0.2	0.1405	0	1.01	61.8	4.351
24-Feb-17	49:17.0	24.774	97.6	0	0.2553	0	0	345.4	4.224
24-Feb-17	49:17.0	24.412	88	0	0.1366	0	0	353.8	4.194
24-Feb-17	49:17.0	32.924	71.3	0	0.1421	0	1.01	181.1	4.339
24-Feb-17	49:17.0	24.726	87	0	0.1382	0	0	353.8	4.2
24-Feb-17	49:17.0	23.833	98.5	0.2	0.256	0	0	345.4	4.206
24-Feb-17	49:17.0	23.905	90.4	0	0.1352	0	0	353.8	4.188
24-Feb-17	49:17.0	23.617	92.1	0	0.1335	0	0	353.8	4.188
24-Feb-17	49:17.0	24.412	92.8	0	0.1331	0	0	353.8	4.188
24-Feb-17	49:17.0	26.793	86.2	0	0.1321	0	0.5	348.2	4.249
24-Feb-17	49:17.0	29.09	77.8	0	0.1321	0	1.01	334.1	4.291
24-Feb-17	49:17.0	32.949	64.9	0	0.1317	0	1.01	102.5	4.363
24-Feb-17	49:17.0	31.382	66.4	0	0.1317	0	1.51	299	4.333
24-Feb-17	49:17.0	24.195	89	16	0.1276	0	2.52	28.1	4.321
24-Feb-17	49:17.0	25.72	91.4	0	0.1321	0	0.5	353.8	4.194
25-Feb-17	49:17.0	25.016	96.4	0	0.2494	0	0	328.5	4.224
25-Feb-17	49:17.0	28.345	89.4	0	0.2524	0	1.01	307.5	4.351
25-Feb-17	49:17.0	30.117	81	0	0.252	0	1.51	338.3	4.345
25-Feb-17	49:17.0	28.171	85.5	0	0.2509	0	0.5	328.5	4.303
25-Feb-17	49:17.0	26.646	91.6	0	0.2512	0	0	328.5	4.279
25-Feb-17	49:17.0	26.304	94	0	0.2505	0	0	328.5	4.261
25-Feb-17	49:17.0	26.182	94.5	0	0.2505	0	0	328.5	4.249
25-Feb-17	49:17.0	24.484	97	0	0.2494	0	0	328.5	4.218
25-Feb-17	49:17.0	25.404	95.8	0	0.2502	0	0	328.5	4.224
25-Feb-17	49:17.0	25.623	92.9	0	0.2505	0	1.01	226	4.351
25-Feb-17	49:17.0	25.695	95.1	0	0.2502	0	0	328.5	4.237
25-Feb-17	49:17.0	23.184	99	0	0.2557	0	0	345.4	4.2
25-Feb-17	49:17.0	23.737	98.8	0	0.256	0	0	345.4	4.2
25-Feb-17	49:17.0	24.339	89.8	1.8	0.2449	0	2.01	88.4	4.321
25-Feb-17	49:17.0	23.232	99	0	0.256	0	0	345.4	4.2
25-Feb-17	49:17.0	23.641	98.5	0	0.256	0	0	345.4	4.206
25-Feb-17	49:17.0	23.737	99.3	0	0.2557	0	0	345.4	4.194
25-Feb-17	49:17.0	24.798	99	0	0.2557	0	0.5	345.4	4.249
25-Feb-17	49:17.0	26.524	98	0	0.2557	0	0.5	310.3	4.351
25-Feb-17	49:17.0	29.09	89.8	0	0.255	0	1.01	318.7	4.339
25-Feb-17	49:17.0	31.893	77.3	0	0.2538	0	1.51	311.7	4.333
25-Feb-17	49:17.0	31.433	77.2	0	0.2524	0	1.01	192.3	4.369
25-Feb-17	49:17.0	31.459	70.9	0	0.2516	0	1.51	338.3	4.345
25-Feb-17	49:17.0	23.521	98.9	0	0.256	0	0	345.4	4.2
26-Feb-17	49:17.0	25.574	91.8	0	0.2355	0	0	286.4	4.231
26-Feb-17	49:17.0	34.969	52.1	0	0.2374	0	1.01	200.8	4.327
26-Feb-17	49:17.0	32.253	72.9	0	0.2403	0	0.5	301.8	4.327
26-Feb-17	49:17.0	28.916	77.8	0	0.2363	0	0.5	287.8	4.261
26-Feb-17	49:17.0	26.426	87.5	0.2	0.2367	0	1.01	287.8	4.249
26-Feb-17	49:17.0	25.283	92.8	0	0.2347	0	1.01	287.8	4.249
26-Feb-17	49:17.0	25.137	92.7	0	0.2344	0	0.5	287.8	4.218
26-Feb-17	49:17.0	24.871	93.6	0	0.233	0	0	287.8	4.212
26-Feb-17	49:17.0	24.968	94.7	0	0.2327	0	0	287.8	4.206
26-Feb-17	49:17.0	24.291	95.1	0	0.2318	0	3.02	161.5	4.2
26-Feb-17	49:17.0	24.677	95.5	0	0.2323	0	0	287.8	4.2
26-Feb-17	49:17.0	24.581	97.7	0	0.249	0	0	328.5	4.212
26-Feb-17	49:17.0	30.394	75.4	0	0.2363	0	0.5	287.8	4.297
26-Feb-17	49:17.0	24.026	97.7	0	0.249	0	0	328.5	4.206
26-Feb-17	49:17.0	23.569	98.1	0	0.249	0	0	328.5	4.2
26-Feb-17	49:17.0	23.136	98.3	0	0.2487	0	0	328.5	4.2
26-Feb-17	49:17.0	22.992	98.5	0	0.2487	0	0	328.5	4.2
26-Feb-17	49:17.0	25.671	97.3	0	0.249	0	1.01	314.5	4.194
26-Feb-17	49:17.0	27.974	87.5	0	0.2483	0	0.5	315.9	4.2
26-Feb-17	49:17.0	31.331	74.8	0	0.2468	0	1.51	300.4	4.363
26-Feb-17	49:17.0	33.652	62.1	0	0.2445	0	2.01	313.1	4.339
26-Feb-17	49:17.0	32.278	63.2	0	0.2425	0	1.51	300.4	4.363
26-Feb-17	49:17.0	23.905	98.8	0	0.2487	0	0.5	328.5	4.2
26-Feb-17	49:17.0	33.809	58.5	0	0.2406	0	2.01	306.1	4.333
27-Feb-17	49:17.0	24.75	91.5	0	0.2017	0	0	181.1	4.218
27-Feb-17	49:17.0	31.382	61.4	0	0.2095	0	2.52	143.2	4.327
27-Feb-17	49:17.0	29.865	68.1	0	0.2073	0	3.02	155.8	4.333
27-Feb-17	49:17.0	29.09	70.2	0	0.2056	0	2.01	162.9	4.297
27-Feb-17	49:17.0	27.259	77.6	0	0.2056	0	1.51	154.4	4.267
27-Feb-17	49:17.0	26.109	83.2	0	0.2043	0	0.5	181.1	4.249
27-Feb-17	49:17.0	25.89	85.6	0	0.2035	0	0.5	181.1	4.237
27-Feb-17	49:17.0	25.234	88.6	0	0.2026	0	1.01	181.1	4.224
27-Feb-17	49:17.0	32.717	62.1	0	0.2126	0	2.52	139	4.339
27-Feb-17	49:17.0	31.868	65.6	0	0.2161	0	2.01	176.9	4.333
27-Feb-17	49:17.0	25.598	87.8	0	0.2029	0	0.5	181.1	4.231
27-Feb-17	49:17.0	23.376	96.1	0.2	0.2311	0	0.5	120.7	4.2
27-Feb-17	49:17.0	31.637	64.3	0	0.2112	0	2.52	153	4.327
27-Feb-17	49:17.0	23.521	95.7	0	0.2311	0	0.5	153	4.2
27-Feb-17	49:17.0	24.532	92.8	0	0.2012	0	0	181.1	4.212
27-Feb-17	49:17.0	23.088	96.2	0	0.2306	0	0	29.5	4.194
27-Feb-17	49:17.0	23.256	96.2	0	0.2303	0	0	29.5	4.188
27-Feb-17	49:17.0	23.328	96.3	0	0.2303	0	0	29.5	4.188
27-Feb-17	49:17.0	25.234	92.3	0	0.2299	0	0.5	82.8	4.303
27-Feb-17	49:17.0	27.259	85.7	0	0.2294	0	1.01	161.5	4.333
27-Feb-17	49:17.0	28.816	77.7	0	0.2266	0	1.01	198	4.333
27-Feb-17	49:17.0	30.419	69.2	0	0.2229	0	1.01	276.6	4.345
27-Feb-17	49:17.0	31.714	63.8	0	0.219	0	1.01	9.8	4.345
27-Feb-17	49:17.0	24.05	96	0	0.2303	0	0	29.5	4.224
28-Feb-17	49:17.0	24.436	96.2	0	0.1775	0	0.5	123.5	4.224
28-Feb-17	49:17.0	29.015	79	0	0.1816	0	1.51	178.3	4.339
28-Feb-17	49:17.0	29.09	76.3	0	0.1793	0	1.01	161.5	4.327
28-Feb-17	49:17.0	28.642	76.2	0	0.1779	0	2.52	167.1	4.303
28-Feb-17	49:17.0	25.866	90	0.2	0.1793	0	2.01	172.7	4.279
28-Feb-17	49:17.0	24.412	92.7	0.2	0.1789	0	1.51	132	4.261
28-Feb-17	49:17.0	24.219	94.7	0	0.1783	0	0	124.9	4.249
28-Feb-17	49:17.0	24.484	96.2	0	0.1765	0	1.01	119.3	4.218
28-Feb-17	49:17.0	24.243	95.9	0	0.1779	0	1.01	123.5	4.231
28-Feb-17	49:17.0	28.568	79.4	0	0.182	0	1.51	162.9	4.339
28-Feb-17	49:17.0	24.291	95.6	0	0.1779	0	0.5	124.9	4.237
28-Feb-17	49:17.0	24.532	94.4	0	0.1999	0	0.5	181.1	4.2
28-Feb-17	49:17.0	24.436	93.9	0	0.2003	0	0	181.1	4.206
28-Feb-17	49:17.0	29.59	73.7	0	0.1836	0	2.01	157.2	4.321
28-Feb-17	49:17.0	24.653	94	0	0.2003	0	0	181.1	4.2
28-Feb-17	49:17.0	24.532	92.8	0	0.2008	0	0.5	181.1	4.206
28-Feb-17	49:17.0	25.089	94.1	0	0.1999	0	0.5	181.1	4.194
28-Feb-17	49:17.0	26.475	90.9	0	0.1999	0	2.01	171.3	4.303
28-Feb-17	49:17.0	27.924	84.7	0	0.1985	0	1.51	134.8	4.357
28-Feb-17	49:17.0	29.14	77.8	0	0.1958	0	2.01	176.9	4.333
28-Feb-17	49:17.0	31.433	72.1	0	0.1923	0	2.52	144.6	4.327
28-Feb-17	49:17.0	30.596	71.8	0	0.1895	0	2.52	160	4.333
28-Feb-17	49:17.0	30.041	72	0	0.1862	0	2.52	158.6	4.321
28-Feb-17	49:17.0	24.798	94	0	0.2003	0	0	181.1	4.2
1-Mar-17	49:17.0	25.04	94.8	0	0.1638	0	0	122.1	4.249
1-Mar-17	49:17.0	28.642	81.8	0	0.1656	0	1.01	175.5	4.333
1-Mar-17	49:17.0	27.087	82.5	0	0.1638	0	3.02	165.7	4.321
1-Mar-17	49:17.0	26.109	90	0	0.1638	0	1.51	167.1	4.285
1-Mar-17	49:17.0	24.798	92.2	0.2	0.1642	0	1.01	124.9	4.267
1-Mar-17	49:17.0	25.089	95.9	0.2	0.1638	0	0	122.1	4.243
1-Mar-17	49:17.0	25.137	96.5	0	0.1634	0	0	122.1	4.231
1-Mar-17	49:17.0	25.21	97	0	0.1634	0	0	122.1	4.249
1-Mar-17	49:17.0	24.895	97.1	0	0.1638	0	0	122.1	4.218
1-Mar-17	49:17.0	24.774	97.6	0	0.1634	0	0	122.1	4.212
1-Mar-17	49:17.0	24.267	98.5	0	0.1779	0	1.51	165.7	4.303
1-Mar-17	49:17.0	28.667	81.8	0	0.1663	0	2.01	157.2	4.321
1-Mar-17	49:17.0	23.641	97.4	0.2	0.1793	0	1.01	151.6	4.206
1-Mar-17	49:17.0	29.24	79.7	0	0.1671	0	2.52	160	4.327
1-Mar-17	49:17.0	23.665	97.8	0.2	0.1789	0	1.01	169.9	4.2
1-Mar-17	49:17.0	23.545	98.3	0.4	0.1783	0	1.01	165.7	4.2
1-Mar-17	49:17.0	23.737	98.7	0	0.1783	0	1.01	161.5	4.218
1-Mar-17	49:17.0	23.641	96.9	0	0.1762	0	0.5	136.2	4.206
1-Mar-17	49:17.0	24.002	96.5	0	0.1765	0	1.51	132	4.212
1-Mar-17	49:17.0	28.692	81.8	0	0.1728	0	1.01	181.1	4.339
1-Mar-17	49:17.0	28.568	81.4	0	0.1709	0	1.51	179.7	4.333
1-Mar-17	49:17.0	30.369	75.9	0	0.1689	0	2.01	171.3	4.327
1-Mar-17	49:17.0	26.182	97.2	0	0.1769	0	0.5	143.2	4.339
1-Mar-17	49:17.0	28.221	87	0	0.1752	0	1.01	139	4.339
2-Mar-17	49:17.0	23.569	98.4	0	0.1671	0	0	39.3	4.212
2-Mar-17	49:17.0	23.93	90.5	6.8	0.1475	0	2.01	26.7	4.309
2-Mar-17	49:17.0	24.243	94.5	1.4	0.1499	0	0	341.2	4.285
2-Mar-17	49:17.0	24.002	95.9	0.2	0.1538	0	0	341.2	4.267
2-Mar-17	49:17.0	23.713	96.7	0	0.1558	0	0	341.2	4.249
2-Mar-17	49:17.0	23.881	97.1	0	0.1566	0	0	341.2	4.249
2-Mar-17	49:17.0	23.93	97.7	0	0.1577	0	0	341.2	4.237
2-Mar-17	49:17.0	23.617	98.4	0	0.1629	0	0	39.3	4.224
2-Mar-17	49:17.0	29.79	76.8	0	0.1562	0	2.01	168.5	4.345
2-Mar-17	49:17.0	31.306	70.5	0	0.1562	0	2.52	290.6	4.357
2-Mar-17	49:17.0	23.497	97.9	0	0.16	0	1.01	18.3	4.224
2-Mar-17	49:17.0	24.581	98.2	0	0.1623	0	0	122.1	4.206
2-Mar-17	49:17.0	30.293	74.8	0	0.1551	0	1.01	95.5	4.339
2-Mar-17	49:17.0	24.653	97.9	0	0.1634	0	0	122.1	4.206
2-Mar-17	49:17.0	23.521	98.7	0	0.1732	0	0	39.3	4.206
2-Mar-17	49:17.0	24.605	98.3	0	0.1623	0	0	122.1	4.2
2-Mar-17	49:17.0	24.532	98.5	0	0.1629	0	0	122.1	4.2
2-Mar-17	49:17.0	24.581	98.6	0	0.1629	0	0	122.1	4.2
2-Mar-17	49:17.0	26.646	96.9	0	0.1619	0	0	122.1	4.309
2-Mar-17	49:17.0	27.333	90.4	0	0.1615	0	0	122.1	4.357
2-Mar-17	49:17.0	28.543	83.9	0	0.1608	0	0.5	122.1	4.327
2-Mar-17	49:17.0	31.944	68.9	0	0.1585	0	1.51	341.2	4.351
2-Mar-17	49:17.0	32.33	68.5	0	0.157	0	0.5	304.7	4.369
2-Mar-17	49:17.0	24.774	98.4	0	0.1619	0	0	122.1	4.2
3-Mar-17	49:17.0	26.036	96	0	0.2003	0	0	129.2	4.212
3-Mar-17	49:17.0	32.381	66.6	0	0.2047	0	0	133.4	4.351
3-Mar-17	49:17.0	31.052	72.2	0	0.2029	0	0	129.2	4.327
3-Mar-17	49:17.0	29.74	78	0	0.2026	0	0	129.2	4.285
3-Mar-17	49:17.0	28.023	88	0	0.2017	0	0	129.2	4.255
3-Mar-17	49:17.0	27.456	90.9	0	0.2017	0	0	129.2	4.249
3-Mar-17	49:17.0	26.622	93.3	0	0.2008	0	0	129.2	4.231
3-Mar-17	49:17.0	25.768	96.3	0	0.1994	0	0	129.2	4.206
3-Mar-17	49:17.0	26.207	95.6	0	0.1999	0	0	129.2	4.218
3-Mar-17	49:17.0	32.717	62	0	0.2061	0	0.5	139	4.339
3-Mar-17	49:17.0	26.402	94.6	0	0.2008	0	0	129.2	4.224
3-Mar-17	49:17.0	23.521	99.5	0	0.2064	0	0	39.3	4.2
3-Mar-17	49:17.0	23.328	99.1	0	0.1885	0	0	39.3	4.2
3-Mar-17	49:17.0	35.235	51.6	0	0.2073	0	2.52	328.5	4.345
3-Mar-17	49:17.0	23.376	99.3	0	0.2017	0	0	39.3	4.2
3-Mar-17	49:17.0	23.448	98.9	0	0.1803	0	0	39.3	4.206
3-Mar-17	49:17.0	23.93	99.6	0	0.2104	0	0	39.3	4.2
3-Mar-17	49:17.0	24.919	99.7	0	0.2139	0	0	39.3	4.285
3-Mar-17	49:17.0	27.21	98.2	0	0.2161	0	0.5	32.3	4.333
3-Mar-17	49:17.0	30.066	82.6	0	0.2156	0	2.01	306.1	4.351
3-Mar-17	49:17.0	32.073	68.9	0	0.2139	0	2.52	311.7	4.345
3-Mar-17	49:17.0	32.872	65.2	0	0.2109	0	2.01	314.5	4.345
3-Mar-17	49:17.0	34.863	55.2	0	0.2095	0	1.51	328.5	4.321
3-Mar-17	49:17.0	23.256	99.2	0	0.1958	0	0	39.3	4.2
4-Mar-17	49:17.0	26.451	77.4	0	0.1752	0	0	355.2	4.237
4-Mar-17	49:17.0	32.898	57.1	0	0.182	0	3.02	341.2	4.363
4-Mar-17	49:17.0	31.944	61.4	0	0.1813	0	4.03	344	4.333
4-Mar-17	49:17.0	30.243	60	0	0.1789	0	1.51	273.8	4.273
4-Mar-17	49:17.0	28.122	66.9	0	0.1775	0	1.01	355.2	4.249
4-Mar-17	49:17.0	26.182	81.6	0	0.1728	0	0.5	355.2	4.224
4-Mar-17	49:17.0	25.793	86.4	0	0.1724	0	0	355.2	4.224
4-Mar-17	49:17.0	25.768	88.4	0	0.1709	0	0	355.2	4.212
4-Mar-17	49:17.0	25.623	88.5	0	0.1699	0	0	355.2	4.206
4-Mar-17	49:17.0	36.878	48	0	0.1816	0	2.52	332.7	4.321
4-Mar-17	49:17.0	24.677	92.2	0	0.1689	0	0	355.2	4.206
4-Mar-17	49:17.0	25.162	97.2	0	0.1994	0	0	129.2	4.2
4-Mar-17	49:17.0	32.872	50.9	0	0.1807	0	4.53	344	4.315
4-Mar-17	49:17.0	24.388	97.7	0	0.199	0	0	129.2	4.2
4-Mar-17	49:17.0	23.833	97.9	0	0.1985	0	0	129.2	4.2
4-Mar-17	49:17.0	23.593	98.1	0	0.1985	0	0	129.2	4.194
4-Mar-17	49:17.0	24.532	98.4	0	0.1981	0	0	129.2	4.188
4-Mar-17	49:17.0	29.439	85.7	0	0.1958	0	2.01	303.2	4.345
4-Mar-17	49:17.0	32.898	68.8	0	0.1917	0	1.51	349.6	4.339
4-Mar-17	49:17.0	33.6	56.5	0	0.1876	0	3.52	352.4	4.333
4-Mar-17	49:17.0	35.904	53.4	0	0.1843	0	2.52	2.8	4.327
4-Mar-17	49:17.0	25.671	96.8	0	0.1999	0	0	129.2	4.2
4-Mar-17	49:17.0	26.622	96.7	0	0.1981	0	1.01	129.2	4.188
4-Mar-17	49:17.0	37.673	45.8	0	0.1807	0	1.51	339.7	4.351
5-Mar-17	49:17.0	23.112	97.2	0	0.2955	0	2.01	353.8	4.206
5-Mar-17	49:17.0	32.768	65.2	0	0.1671	0	2.01	185.3	4.351
5-Mar-17	49:17.0	31.74	69.7	0	0.1663	0	1.01	158.6	4.303
5-Mar-17	49:17.0	30.091	78	0	0.1667	0	0	160	4.261
5-Mar-17	49:17.0	29.09	79.7	0	0.1648	0	0.5	157.2	4.249
5-Mar-17	49:17.0	24.171	88.8	13.4	0.1562	0	2.01	16.8	4.261
5-Mar-17	49:17.0	23.16	94.6	15	0.1542	0	3.02	339.7	4.224
5-Mar-17	49:17.0	22.944	96.8	0.8	0.3015	0	1.01	143.2	4.212
5-Mar-17	49:17.0	34.889	54.7	0	0.1619	0	2.01	140.4	4.345
5-Mar-17	49:17.0	35.555	53.3	0	0.1596	0	2.52	129.2	4.351
5-Mar-17	49:17.0	22.992	96.1	11	0.3048	0	1.51	217.6	4.218
5-Mar-17	49:17.0	23.93	94.8	0	0.1677	0	0	355.2	4.2
5-Mar-17	49:17.0	33.183	59.1	0	0.1642	0	1.51	144.6	4.303
5-Mar-17	49:17.0	24.267	93.7	0	0.1685	0	0	355.2	4.2
5-Mar-17	49:17.0	23.088	97.5	0	0.2932	0	1.01	338.3	4.206
5-Mar-17	49:17.0	23.905	95.6	0	0.1671	0	0	355.2	4.2
5-Mar-17	49:17.0	23.641	96.2	0	0.1671	0	0	355.2	4.2
5-Mar-17	49:17.0	23.4	96.6	0	0.1667	0	0	355.2	4.194
5-Mar-17	49:17.0	26.402	91.2	0	0.1663	0	0.5	355.2	4.273
5-Mar-17	49:17.0	28.295	81.9	0	0.1648	0	1.01	352.4	4.315
5-Mar-17	49:17.0	32.433	67	0	0.1623	0	1.51	185.3	4.351
5-Mar-17	49:17.0	34.492	61.3	0	0.1604	0	1.51	235.9	4.327
5-Mar-17	49:17.0	36.092	54.4	0	0.159	0	2.52	158.6	4.321
5-Mar-17	49:17.0	24.532	96.6	0	0.1667	0	0	355.2	4.188
6-Mar-17	49:17.0	24.702	96	0	0.2726	0	0	189.5	4.206
6-Mar-17	49:17.0	32.175	68.6		0.2766	0	1.01	181.1	4.333
6-Mar-17	49:17.0	29.991	80.7	0	0.2756	0	0.5	189.5	4.297
6-Mar-17	49:17.0	28.941	85.2	0	0.2746	0	0	189.5	4.267
6-Mar-17	49:17.0	27.554	90.5	0	0.2739	0	0	189.5	4.249
6-Mar-17	49:17.0	27.21	93	0	0.2739	0	0	189.5	4.237
6-Mar-17	49:17.0	26.671	94.6	0	0.2736	0	0	189.5	4.224
6-Mar-17	49:17.0	24.823	96.8	0	0.2719	0	0	189.5	4.2
6-Mar-17	49:17.0	25.162	95.6	0	0.2726	0	0	189.5	4.212
6-Mar-17	49:17.0	32.639	76.4	0	0.2786	0	0	181.1	4.321
6-Mar-17	49:17.0	26.012	94.9	0	0.2729	0	0	189.5	4.218
6-Mar-17	49:17.0	22.585	98.6	0	0.2874	0	0	324.3	4.194
6-Mar-17	49:17.0	22.824	98.1	0	0.2908	0	0	324.3	4.2
6-Mar-17	49:17.0	30.444	80.2	0	0.28	0	1.01	181.1	4.333
6-Mar-17	49:17.0	22.8	98.6	0	0.2884	0	0	324.3	4.2
6-Mar-17	49:17.0	22.944	97.7	0	0.2919	0	0	324.3	4.2
6-Mar-17	49:17.0	23.472	99	0	0.2874	0	0	324.3	4.188
6-Mar-17	49:17.0	24.629	99.1	0	0.2877	0	0	324.3	4.249
6-Mar-17	49:17.0	26.72	97.2	0	0.2874	0	0.5	314.5	4.2
6-Mar-17	49:17.0	29.69	85.2	0	0.2861	0	2.01	117.9	4.327
6-Mar-17	49:17.0	31.919	75.9	0	0.2847	0	2.01	130.6	4.345
6-Mar-17	49:17.0	32.613	70.4	0	0.283	0	2.01	168.5	4.321
6-Mar-17	49:17.0	31.153	75.9	0	0.281	0	2.01	174.1	4.333
6-Mar-17	49:17.0	22.92	98.2	0	0.2895	0	0	324.3	4.2
7-Mar-17	49:17.0	26.842	77.3	0	0.2528	0	0	154.4	4.243
7-Mar-17	49:17.0	33.521	54.7	0	0.2575	0	4.03	151.6	4.315
7-Mar-17	49:17.0	34.124	51.1	0	0.2592	0	3.52	146	4.327
7-Mar-17	49:17.0	30.874	59.5	0	0.2553	0	2.52	169.9	4.291
7-Mar-17	49:17.0	28.394	67.9	0	0.2534	0	1.51	150.2	4.255
7-Mar-17	49:17.0	25.283	85.6	0	0.252	0	0	154.4	4.231
7-Mar-17	49:17.0	24.484	90.2	0	0.252	0	0	154.4	4.255
7-Mar-17	49:17.0	24.267	92	0	0.2512	0	0	154.4	4.218
7-Mar-17	49:17.0	23.809	93.1	0	0.2509	0	0	154.4	4.206
7-Mar-17	49:17.0	23.617	95.5	0	0.2502	0	0	154.4	4.2
7-Mar-17	49:17.0	23.593	94.7	0	0.2505	0	0	154.4	4.206
7-Mar-17	49:17.0	24.557	96.6	0	0.2719	0	0.5	189.5	4.2
7-Mar-17	49:17.0	33.652	57.1	0	0.2618	0	2.52	133.4	4.339
7-Mar-17	49:17.0	23.857	96.4	0	0.2715	0	0.5	188.1	4.2
7-Mar-17	49:17.0	23.376	97.1	0	0.2712	0	0	188.1	4.2
7-Mar-17	49:17.0	23.448	97.7	0	0.2708	0	0	188.1	4.194
7-Mar-17	49:17.0	23.617	97.9	0	0.2708	0	0	188.1	4.188
7-Mar-17	49:17.0	25.574	94.3	0	0.2701	0	1.01	188.1	4.273
7-Mar-17	49:17.0	27.382	85.9	0	0.2694	0	1.51	188.1	4.333
7-Mar-17	49:17.0	29.464	76.7	0	0.2677	0	2.52	181.1	4.333
7-Mar-17	49:17.0	32.021	66.2	0	0.266	0	1.51	113.7	4.333
7-Mar-17	49:17.0	32.458	61.7	0	0.2639	0	2.52	129.2	4.381
7-Mar-17	49:17.0	24.219	98	0	0.2705	0	0	188.1	4.2
7-Mar-17	49:17.0	32.484	56.8	0	0.2564	0	2.52	158.6	4.333
8-Mar-17	49:17.0	24.315	91.7	0	0.2254	0	1.51	154.4	4.206
8-Mar-17	49:17.0	33.027	58.4	0	0.2303	0	2.01	150.2	4.321
8-Mar-17	49:17.0	31.74	62	0	0.2291	0	1.01	151.6	4.309
8-Mar-17	49:17.0	28.568	73.5	0	0.2274	0	0	153	4.261
8-Mar-17	49:17.0	26.842	83.5	0	0.2266	0	0	153	4.249
8-Mar-17	49:17.0	25.793	87.7	0	0.2262	0	0	153	4.231
8-Mar-17	49:17.0	26.573	83	0	0.2266	0	2.01	147.4	4.224
8-Mar-17	49:17.0	24.629	88.6	0	0.2249	0	0.5	151.6	4.212
8-Mar-17	49:17.0	34.124	55	0	0.2335	0	1.01	202.2	4.321
8-Mar-17	49:17.0	33.469	58.4	0	0.2358	0	2.52	172.7	4.375
8-Mar-17	49:17.0	24.653	86.3	0	0.2257	0	1.51	143.2	4.218
8-Mar-17	49:17.0	23.136	96.3	0	0.2494	0	0	154.4	4.2
8-Mar-17	49:17.0	33.835	54.1	0	0.2315	0	1.01	190.9	4.309
8-Mar-17	49:17.0	23.641	95.8	0	0.2498	0	0	154.4	4.2
8-Mar-17	49:17.0	24.146	93.5	0	0.2249	0	0	154.4	4.2
8-Mar-17	49:17.0	22.872	96.8	0	0.2494	0	0	154.4	4.2
8-Mar-17	49:17.0	22.202	97.2	0	0.249	0	0	154.4	4.194
8-Mar-17	49:17.0	22.106	97.4	0	0.249	0	0	154.4	4.188
8-Mar-17	49:17.0	25.744	96	0	0.2479	0	0.5	158.6	4.273
8-Mar-17	49:17.0	27.456	87.6	0	0.2468	0	1.51	205	4.339
8-Mar-17	49:17.0	29.941	76.4	0	0.2445	0	2.52	192.3	4.339
8-Mar-17	49:17.0	31.663	70	0	0.2418	0	2.01	186.7	4.345
8-Mar-17	49:17.0	33.261	61.7	0	0.2387	0	2.52	165.7	4.351
8-Mar-17	49:17.0	23.28	97.8	0	0.249	0	0	154.4	4.2
9-Mar-17	49:17.0	24.798	89.8	0	0.1967	0	1.01	174.1	4.206
9-Mar-17	49:17.0	32.691	58.1	0	0.2008	0	1.01	22.5	4.363
9-Mar-17	49:17.0	30.268	65.7	0	0.1999	0	1.01	345.4	4.303
9-Mar-17	49:17.0	28.568	72.1	0	0.1985	0	0	342.6	4.267
9-Mar-17	49:17.0	26.622	83.9	0	0.1976	0	0	342.6	4.249
9-Mar-17	49:17.0	26.28	85.7	0	0.1976	0	0	342.6	4.237
9-Mar-17	49:17.0	25.404	88.6	0	0.1967	0	0	342.6	4.224
9-Mar-17	49:17.0	24.436	90.6	0	0.1958	0	0.5	46.3	4.206
9-Mar-17	49:17.0	24.557	92.3	0	0.1963	0	1.01	311.7	4.212
9-Mar-17	49:17.0	32.768	60.2	0	0.2029	0	1.01	230.2	4.375
9-Mar-17	49:17.0	24.968	90.8	0	0.1972	0	0	342.6	4.218
9-Mar-17	49:17.0	22.561	96.8	0	0.2245	0	0	155.8	4.188
9-Mar-17	49:17.0	23.737	95.1	0	0.2245	0	0	155.8	4.2
9-Mar-17	49:17.0	34.124	57.2	0	0.2052	0	1.01	290.6	4.369
9-Mar-17	49:17.0	23.016	96.3	0	0.2241	0	0	155.8	4.194
9-Mar-17	49:17.0	23.905	94.6	0	0.2245	0	0	155.8	4.2
9-Mar-17	49:17.0	23.569	97.1	0	0.2241	0	0	155.8	4.188
9-Mar-17	49:17.0	25.793	94.9	0	0.2229	0	1.01	259.7	4.194
9-Mar-17	49:17.0	27.801	83.9	0	0.2211	0	1.01	242.9	4.375
9-Mar-17	49:17.0	30.268	72.1	0	0.2182	0	1.51	179.7	4.339
9-Mar-17	49:17.0	32.458	66.4	0	0.2139	0	1.51	154.4	4.339
9-Mar-17	49:17.0	30.571	69.7	0	0.2109	0	2.52	186.7	4.327
9-Mar-17	49:17.0	31.663	64.4	0	0.207	0	1.01	234.5	4.351
9-Mar-17	49:17.0	23.593	95.5	0	0.2245	0	0	155.8	4.2
10-Mar-17	49:17.0	25.477	83.9	0	0.2987	0	1.01	126.4	4.267
10-Mar-17	49:17.0	28.965	82.5	0	0.3183	0	3.02	146	4.345
10-Mar-17	49:17.0	27.924	78.8	0.2	0.3048	0	3.02	134.8	4.381
10-Mar-17	49:17.0	26.72	82	0	0.3022	0	2.52	139	4.333
10-Mar-17	49:17.0	25.647	86.8	0	0.3001	0	3.52	129.2	4.315
10-Mar-17	49:17.0	25.137	86.7	0	0.297	0	1.51	127.8	4.255
10-Mar-17	49:17.0	24.968	86.6	0	0.2959	0	1.51	137.6	4.249
10-Mar-17	49:17.0	24.219	89.4	0	0.2952	0	1.51	123.5	4.237
10-Mar-17	49:17.0	23.737	91.6	0	0.2942	0	0.5	95.5	4.224
10-Mar-17	49:17.0	23.016	96.4	0	0.2935	0	0	124.9	4.212
10-Mar-17	49:17.0	22.944	95.4	0.2	0.2942	0	1.01	119.3	4.224
10-Mar-17	49:17.0	24.098	91.3	0	0.1958	0	0	46.3	4.2
10-Mar-17	49:17.0	28.717	78.5	0	0.3087	0	2.52	144.6	4.327
10-Mar-17	49:17.0	23.665	93.1	0	0.1958	0	0	46.3	4.2
10-Mar-17	49:17.0	23.136	94.5	0	0.1958	0	0	46.3	4.2
10-Mar-17	49:17.0	23.016	95.3	0	0.1958	0	0	35.1	4.194
10-Mar-17	49:17.0	22.657	96	0	0.1963	0	0	30.9	4.194
10-Mar-17	49:17.0	23.737	96.9	23.01	0.1967	0	0.5	32.3	4.224
10-Mar-17	49:17.0	23.376	97.6	15.2	0.3683	0	2.01	165.7	4.224
10-Mar-17	49:17.0	25.574	97.7	0	0.3339	0	1.01	171.3	4.351
10-Mar-17	49:17.0	29.515	89	0	0.324	0	1.51	153	4.339
10-Mar-17	49:17.0	27.014	93.3	1.4	0.3219	0	3.02	147.4	4.339
10-Mar-17	49:17.0	23.905	96.5	0	0.1963	0	0	30.9	4.188
10-Mar-17	49:17.0	27.112	85.3	0	0.3125	0	2.52	141.8	4.345
11-Mar-17	49:17.0	22.321	95.2	0	0.2949	0	2.52	160	4.231
11-Mar-17	49:17.0	24.919	86.9	0	0.3001	0	2.52	169.9	4.351
11-Mar-17	49:17.0	25.113	88.3	0	0.299	0	0.5	171.3	4.339
11-Mar-17	49:17.0	23.978	91.3	0	0.2976	0	0	171.3	4.339
11-Mar-17	49:17.0	23.737	93.7	0	0.297	0	0	171.3	4.285
11-Mar-17	49:17.0	23.617	94.8	0	0.2963	0	0	171.3	4.267
11-Mar-17	49:17.0	23.569	95.8	0	0.2955	0	0	171.3	4.255
11-Mar-17	49:17.0	22.226	96.2	0	0.2952	0	1.01	176.9	4.237
11-Mar-17	49:17.0	25.137	88.6	0	0.3033	0	2.01	144.6	4.345
11-Mar-17	49:17.0	23.954	96	0	0.3051	0	1.51	120.7	4.333
11-Mar-17	49:17.0	23.136	95.3	0	0.2952	0	1.51	161.5	4.249
11-Mar-17	49:17.0	22.489	97.1	0	0.2925	0	1.51	106.7	4.206
11-Mar-17	49:17.0	25.72	85.9	0	0.3019	0	2.52	153	4.345
11-Mar-17	49:17.0	22.705	96.9	0.2	0.2925	0	0	124.9	4.206
11-Mar-17	49:17.0	22.058	96.3	0	0.2946	0	1.01	129.2	4.224
11-Mar-17	49:17.0	22.13	97.7	4.4	0.2938	0	1.01	54.8	4.2
11-Mar-17	49:17.0	21.413	98.1	1.6	0.3026	0	1.01	92.7	4.2
11-Mar-17	49:17.0	21.413	98.4	0.8	0.3087	0	1.01	162.9	4.2
11-Mar-17	49:17.0	21.056	98.9	0.2	0.3051	0	0	179.7	4.194
11-Mar-17	49:17.0	21.223	99	0.8	0.3051	0	1.01	148.8	4.237
11-Mar-17	49:17.0	21.461	99.1	0.6	0.3043	0	2.01	75.8	4.363
11-Mar-17	49:17.0	21.413	99.1	0.4	0.3037	0	1.01	123.5	4.339
11-Mar-17	49:17.0	22.178	98.8	0.2	0.3048	0	1.01	137.6	4.351
11-Mar-17	49:17.0	21.079	98.8	0.4	0.3077	0	1.51	179.7	4.194
12-Mar-17	49:17.0	21.7	97.9	0	0.2895	0	0	113.7	4.224
12-Mar-17	49:17.0	27.382	80.6	0	0.2932	0	1.01	102.5	4.363
12-Mar-17	49:17.0	25.866	86	0	0.2922	0	0.5	113.7	4.321
12-Mar-17	49:17.0	25.089	90.5	0	0.2914	0	0	113.7	4.291
12-Mar-17	49:17.0	24.146	94	0	0.2908	0	0	113.7	4.267
12-Mar-17	49:17.0	23.376	95.5	0	0.2904	0	0	113.7	4.255
12-Mar-17	49:17.0	22.8	96.3	0	0.2901	0	0	113.7	4.249
12-Mar-17	49:17.0	21.294	98.1	0	0.2898	0	0	113.7	4.218
12-Mar-17	49:17.0	21.891	97.5	0	0.2898	0	0	113.7	4.224
12-Mar-17	49:17.0	28.147	78.8	0	0.2946	0	1.51	167.1	4.363
12-Mar-17	49:17.0	22.345	97.1	0	0.2901	0	0	113.7	4.237
12-Mar-17	49:17.0	21.39	98.9	0.8	0.2932	0	0.5	102.5	4.2
12-Mar-17	49:17.0	21.724	97.7	1	0.2911	0	0.5	127.8	4.212
12-Mar-17	49:17.0	28.692	80.7	0	0.2963	0	1.01	172.7	4.339
12-Mar-17	49:17.0	21.437	98.6	0.8	0.2914	0	0	81.4	4.2
12-Mar-17	49:17.0	21.891	97	0	0.2938	0	0.5	129.2	4.218
12-Mar-17	49:17.0	21.604	99.2	1	0.2949	0	0	109.5	4.2
12-Mar-17	49:17.0	22.106	99.3	0.4	0.2966	0	0	109.5	4.273
12-Mar-17	49:17.0	22.489	99.4	0.2	0.297	0	0.5	102.5	4.369
12-Mar-17	49:17.0	23.593	99	0	0.299	0	0.5	102.5	4.339
12-Mar-17	49:17.0	24.944	94.7	0	0.299	0	1.01	160	4.345
12-Mar-17	49:17.0	26.182	89.1	0	0.2984	0	1.51	158.6	4.345
12-Mar-17	49:17.0	26.012	84.8	0	0.2973	0	2.52	172.7	4.339
12-Mar-17	49:17.0	21.533	98.4	0.2	0.2911	0	1.01	96.9	4.206
13-Mar-17	49:17.0	23.833	76.3	0	0.2759	0	0	172.7	4.261
13-Mar-17	49:17.0	29.74	55.9	0	0.278	0	3.52	160	4.363
13-Mar-17	49:17.0	28.27	58.7	0	0.277	0	2.52	167.1	4.321
13-Mar-17	49:17.0	25.841	66.4	0	0.2766	0	1.51	171.3	4.279
13-Mar-17	49:17.0	30.066	56.9	0	0.28	0	2.52	158.6	4.339
13-Mar-17	49:17.0	23.352	80	0	0.2756	0	0	172.7	4.249
13-Mar-17	49:17.0	21.867	85.6	0	0.2756	0	0	172.7	4.243
13-Mar-17	49:17.0	21.819	85.4	0	0.2756	0	0	172.7	4.231
13-Mar-17	49:17.0	20.674	89.3	0	0.2756	0	0	172.7	4.224
13-Mar-17	49:17.0	20.007	92.6	0	0.2753	0	0	172.7	4.224
13-Mar-17	49:17.0	23.232	98	0	0.2887	0	0	113.7	4.273
13-Mar-17	49:17.0	19.365	94.4	0	0.2749	0	0	172.7	4.218
13-Mar-17	49:17.0	22.417	98.7	0	0.2895	0	0	113.7	4.206
13-Mar-17	49:17.0	30.976	57.4	0	0.2821	0	2.52	133.4	4.363
13-Mar-17	49:17.0	22.226	98.8	0	0.2895	0	0	113.7	4.2
13-Mar-17	49:17.0	22.154	99	0	0.289	0	0	113.7	4.2
13-Mar-17	49:17.0	22.058	99.1	0	0.2887	0	0	113.7	4.2
13-Mar-17	49:17.0	22.393	99	0	0.289	0	0	113.7	4.2
13-Mar-17	49:17.0	25.089	91.1	0	0.2887	0	0.5	116.5	4.345
13-Mar-17	49:17.0	28.941	68.7	0	0.2864	0	3.02	141.8	4.351
13-Mar-17	49:17.0	29.715	60.4	0	0.2853	0	3.02	146	4.351
13-Mar-17	49:17.0	30.142	57.2	0	0.2837	0	3.52	147.4	4.351
13-Mar-17	49:17.0	21.915	98.5	0	0.2895	0	0	113.7	4.212
13-Mar-17	49:17.0	27.014	82.2	0	0.2877	0	1.51	120.7	4.339
14-Mar-17	49:17.0	22.848	90.8	0	0.2596	0	0	161.5	4.218
14-Mar-17	49:17.0	28.791	68.5	0	0.2611	0	1.51	169.9	4.351
14-Mar-17	49:17.0	27.382	71.2	0	0.2604	0	0	165.7	4.321
14-Mar-17	49:17.0	25.283	81.8	0	0.2596	0	0	165.7	4.285
14-Mar-17	49:17.0	23.761	87.7	0	0.2596	0	0	165.7	4.267
14-Mar-17	49:17.0	22.968	91.1	0	0.2592	0	0	165.7	4.249
14-Mar-17	49:17.0	22.824	92.2	0	0.26	0	0	165.7	4.249
14-Mar-17	49:17.0	22.944	92.5	0	0.2596	0	0	162.9	4.224
14-Mar-17	49:17.0	29.565	63.8	0	0.2642	0	2.01	150.2	4.363
14-Mar-17	49:17.0	29.715	65.1	0	0.2666	0	1.01	143.2	4.345
14-Mar-17	49:17.0	22.848	93.6	0	0.26	0	0	165.7	4.237
14-Mar-17	49:17.0	18.866	96.1	0	0.2746	0	0	172.7	4.206
14-Mar-17	49:17.0	30.318	63.9	0	0.2624	0	1.51	176.9	4.351
14-Mar-17	49:17.0	18.913	95.3	0	0.2749	0	0	172.7	4.206
14-Mar-17	49:17.0	22.106	91.9	0	0.2596	0	0	161.5	4.218
14-Mar-17	49:17.0	19.151	96.7	0	0.2746	0	0	172.7	4.2
14-Mar-17	49:17.0	19.603	97	0	0.2743	0	0	172.7	4.2
14-Mar-17	49:17.0	19.389	97	0	0.2743	0	0	172.7	4.2
14-Mar-17	49:17.0	22.657	95.7	0	0.2739	0	0	172.7	4.315
14-Mar-17	49:17.0	24.363	85	0	0.2732	0	0.5	262.5	4.333
14-Mar-17	49:17.0	26.524	77.9	0	0.2722	0	2.01	209.2	4.357
14-Mar-17	49:17.0	28.791	68.5	0	0.2705	0	3.02	115.1	4.363
14-Mar-17	49:17.0	28.891	64	0	0.2687	0	2.52	174.1	4.345
14-Mar-17	49:17.0	20.246	97.6	0	0.2743	0	0	172.7	4.2
15-Mar-17	49:17.0	20.412	93.1	0	0.2371	0	0	214.8	4.212
15-Mar-17	49:17.0	29.515	61.6	0	0.2403	0	2.01	189.5	4.369
15-Mar-17	49:17.0	28.295	64.6	0	0.2379	0	0.5	172.7	4.309
15-Mar-17	49:17.0	26.426	76.2	0	0.2363	0	0	174.1	4.267
15-Mar-17	49:17.0	24.436	83.1	0	0.2358	0	0	174.1	4.249
15-Mar-17	49:17.0	23.472	87.8	0	0.2363	0	0	174.1	4.243
15-Mar-17	49:17.0	22.441	90	0	0.2367	0	0	174.1	4.237
15-Mar-17	49:17.0	19.912	94	0	0.2374	0	0	214.8	4.206
15-Mar-17	49:17.0	21.223	92.2	0	0.2367	0	0	182.5	4.224
15-Mar-17	49:17.0	32.924	48.5	0	0.2418	0	1.01	238.7	4.339
15-Mar-17	49:17.0	21.628	90.3	0	0.2371	0	0	174.1	4.224
15-Mar-17	49:17.0	21.151	96.7	0	0.2592	0	0	161.5	4.2
15-Mar-17	49:17.0	21.461	94.7	0	0.2596	0	0	161.5	4.206
15-Mar-17	49:17.0	32.458	54.7	0	0.2437	0	1.51	129.2	4.357
15-Mar-17	49:17.0	20.984	96.2	0	0.2592	0	0	161.5	4.2
15-Mar-17	49:17.0	21.652	93.8	0	0.2596	0	0	161.5	4.206
15-Mar-17	49:17.0	22.465	96.8	0	0.2592	0	0	161.5	4.2
15-Mar-17	49:17.0	23.93	93.1	0	0.2585	0	0.5	171.3	4.231
15-Mar-17	49:17.0	26.646	79.8	0	0.2575	0	0.5	207.8	4.4
15-Mar-17	49:17.0	27.825	75.6	0	0.2557	0	1.01	158.6	4.345
15-Mar-17	49:17.0	30.596	62.4	0	0.2532	0	1.51	113.7	4.369
15-Mar-17	49:17.0	31.893	55.3	0	0.2498	0	1.51	164.3	4.357
15-Mar-17	49:17.0	32.898	53.5	0	0.246	0	1.51	144.6	4.351
15-Mar-17	49:17.0	21.27	95.1	0	0.2592	0	0	161.5	4.2
16-Mar-17	49:17.0	24.726	78.3	0	0.2104	0	0	178.3	4.237
16-Mar-17	49:17.0	31.204	53.2	0	0.2153	0	2.01	162.9	4.321
16-Mar-17	49:17.0	29.74	62	0	0.2131	0	2.01	174.1	4.303
16-Mar-17	49:17.0	27.382	73.2	0	0.2117	0	0	178.3	4.261
16-Mar-17	49:17.0	24.944	82	0	0.2104	0	0	178.3	4.249
16-Mar-17	49:17.0	22.944	85.3	0	0.2095	0	0	178.3	4.224
16-Mar-17	49:17.0	22.369	86.8	0	0.21	0	0	178.3	4.218
16-Mar-17	49:17.0	21.676	87.4	0	0.2092	0	0	178.3	4.212
16-Mar-17	49:17.0	20.627	89	0	0.2095	0	0	178.3	4.206
16-Mar-17	49:17.0	33.992	49.6	0	0.2229	0	2.01	124.9	4.321
16-Mar-17	49:17.0	20.031	90.9	0	0.2092	0	0	178.3	4.206
16-Mar-17	49:17.0	19.27	95.4	0	0.2374	0	0	214.8	4.2
16-Mar-17	49:17.0	34.413	44.7	0	0.2169	0	1.01	157.2	4.339
16-Mar-17	49:17.0	18.985	95.6	0	0.2374	0	0	214.8	4.2
16-Mar-17	49:17.0	18.485	96	0	0.2374	0	0	214.8	4.2
16-Mar-17	49:17.0	18.224	96.4	0	0.2371	0	0	214.8	4.2
16-Mar-17	49:17.0	19.199	96.6	0	0.2374	0	0	214.8	4.194
16-Mar-17	49:17.0	25.186	81.1	0	0.2355	0	0	338.3	4.2
16-Mar-17	49:17.0	28.816	68.9	0	0.2335	0	0	42.1	4.363
16-Mar-17	49:17.0	31.919	59	0	0.2303	0	1.01	235.9	4.369
16-Mar-17	49:17.0	32.82	52.2	0	0.2262	0	1.51	160	4.381
16-Mar-17	49:17.0	19.579	94.8	0	0.2374	0	0	214.8	4.206
16-Mar-17	49:17.0	22.417	94.2	0	0.2371	0	1.01	237.3	4.188
16-Mar-17	49:17.0	34.916	45.6	0	0.2195	0	1.51	140.4	4.345
17-Mar-17	49:17.0	24.171	85.6	0	0.1866	0	0.5	99.7	4.206
17-Mar-17	49:17.0	31.001	50.7	0	0.1932	0	2.52	158.6	4.321
17-Mar-17	49:17.0	29.439	53	0	0.1917	0	1.51	160	4.309
17-Mar-17	49:17.0	26.94	64.7	0	0.1895	0	1.01	169.9	4.267
17-Mar-17	49:17.0	26.378	68.6	0	0.1891	0	0	169.9	4.249
17-Mar-17	49:17.0	26.842	71.5	0	0.1881	0	1.01	168.5	4.267
17-Mar-17	49:17.0	25.55	79.8	0	0.1881	0	1.51	134.8	4.224
17-Mar-17	49:17.0	24.508	85.3	0	0.1872	0	0.5	95.5	4.212
17-Mar-17	49:17.0	32.949	48.6	0	0.1954	0	1.51	134.8	4.321
17-Mar-17	49:17.0	32.665	50.7	0	0.1972	0	3.02	144.6	4.345
17-Mar-17	49:17.0	24.992	82.4	0	0.1876	0	1.01	117.9	4.218
17-Mar-17	49:17.0	18.747	94	0	0.21	0	0	178.3	4.212
17-Mar-17	49:17.0	32.381	47.7	0	0.1945	0	3.02	154.4	4.321
17-Mar-17	49:17.0	19.341	93.1	0	0.21	0	0	178.3	4.2
17-Mar-17	49:17.0	23.136	91.3	0	0.1872	0	1.01	81.4	4.206
17-Mar-17	49:17.0	18.699	94.9	0	0.21	0	0	178.3	4.2
17-Mar-17	49:17.0	18.319	95.1	0	0.21	0	0	179.7	4.194
17-Mar-17	49:17.0	18.176	95.7	0	0.21	0	0	179.7	4.194
17-Mar-17	49:17.0	22.609	90.7	0	0.21	0	0	179.7	4.182
17-Mar-17	49:17.0	24.895	81.5	0	0.2087	0	0.5	178.3	4.2
17-Mar-17	49:17.0	28.196	72.7	0	0.2064	0	1.51	175.5	4.363
17-Mar-17	49:17.0	30.849	62.3	0	0.2029	0	1.51	137.6	4.381
17-Mar-17	49:17.0	32.433	56	0	0.2008	0	2.52	137.6	4.351
17-Mar-17	49:17.0	19.318	95.9	0	0.21	0	0	179.7	4.188
18-Mar-17	49:17.0	24.895	89.4	0	0.1714	0	1.01	137.6	4.206
18-Mar-17	49:17.0	32.381	58.5	0	0.1779	0	2.01	158.6	4.321
18-Mar-17	49:17.0	30.469	61.7	0	0.1779	0	1.51	174.1	4.315
18-Mar-17	49:17.0	28.766	70	0	0.1775	0	1.01	151.6	4.267
18-Mar-17	49:17.0	27.653	74.9	0	0.1765	0	1.51	165.7	4.249
18-Mar-17	49:17.0	27.284	77.6	0	0.1746	0	3.02	144.6	4.231
18-Mar-17	49:17.0	25.72	82.2	0	0.1742	0	2.01	148.8	4.224
18-Mar-17	49:17.0	24.726	90.4	0	0.1714	0	1.01	143.2	4.2
18-Mar-17	49:17.0	24.605	88.2	0	0.1724	0	1.51	136.2	4.206
18-Mar-17	49:17.0	32.924	56.8	0	0.1775	0	2.01	165.7	4.333
18-Mar-17	49:17.0	24.944	86.3	0	0.1732	0	1.51	140.4	4.218
18-Mar-17	49:17.0	22.274	95.7	0	0.1866	0	0	68.8	4.194
18-Mar-17	49:17.0	22.729	93	0	0.1872	0	0.5	68.8	4.2
18-Mar-17	49:17.0	33.914	58.2	0	0.1779	0	1.51	140.4	4.369
18-Mar-17	49:17.0	21.795	94.6	0	0.1866	0	0	68.8	4.194
18-Mar-17	49:17.0	22.705	93	0	0.1872	0	2.01	99.7	4.2
18-Mar-17	49:17.0	22.705	95.8	0	0.1862	0	0	68.8	4.188
18-Mar-17	49:17.0	24.702	90.8	0	0.1866	0	0.5	88.4	4.279
18-Mar-17	49:17.0	25.817	85.7	0	0.1859	0	1.01	172.7	4.339
18-Mar-17	49:17.0	29.14	73.7	0	0.1843	0	2.01	183.9	4.339
18-Mar-17	49:17.0	29.991	64.7	0	0.1826	0	2.52	198	4.339
18-Mar-17	49:17.0	32.15	62	0	0.1807	0	2.01	153	4.339
18-Mar-17	49:17.0	31.255	63.1	0	0.1789	0	2.52	127.8	4.393
18-Mar-17	49:17.0	22.633	93.4	0	0.1872	0	0	68.8	4.2
19-Mar-17	49:17.0	22.609	98.7	0.2	0.1619	0	0	99.7	4.267
19-Mar-17	49:17.0	23.424	97.7	0.6	0.1623	0	1.51	124.9	4.339
19-Mar-17	49:17.0	23.665	97.9	0.6	0.1634	0	0	127.8	4.327
19-Mar-17	49:17.0	23.328	98.2	0.4	0.1623	0	1.51	127.8	4.297
19-Mar-17	49:17.0	22.537	98.5	0.4	0.1604	0	1.51	101.1	4.285
19-Mar-17	49:17.0	22.465	98.9	0	0.1634	0	0	99.7	4.255
19-Mar-17	49:17.0	22.609	99.1	0	0.1648	0	0	99.7	4.249
19-Mar-17	49:17.0	22.657	99.3	0	0.1663	0	0	99.7	4.237
19-Mar-17	49:17.0	22.705	99.3	0	0.1677	0	0	99.7	4.224
19-Mar-17	49:17.0	24.243	95.7	1.4	0.1677	0	4.53	127.8	4.339
19-Mar-17	49:17.0	22.657	99.4	0	0.1685	0	0	99.7	4.224
19-Mar-17	49:17.0	24.557	92.4	0	0.1709	0	1.01	151.6	4.2
19-Mar-17	49:17.0	24.436	97	0.6	0.1638	0	1.01	94.1	4.339
19-Mar-17	49:17.0	24.267	94.8	0	0.1709	0	1.01	165.7	4.194
19-Mar-17	49:17.0	23.761	96	1.4	0.1615	0	2.01	136.2	4.194
19-Mar-17	49:17.0	24.122	96.6	0.2	0.1629	0	0	157.2	4.188
19-Mar-17	49:17.0	24.219	97.3	0	0.1648	0	1.01	115.1	4.188
19-Mar-17	49:17.0	24.992	95.9	0	0.1714	0	2.01	148.8	4.339
19-Mar-17	49:17.0	25.065	95.5	0	0.1703	0	1.01	154.4	4.339
19-Mar-17	49:17.0	26.378	94	0.2	0.1709	0	1.01	151.6	4.345
19-Mar-17	49:17.0	26.158	91.5	0	0.1699	0	3.02	150.2	4.345
19-Mar-17	49:17.0	24.726	91.4	0	0.1709	0	1.01	143.2	4.2
19-Mar-17	49:17.0	24.774	97.4	0	0.1685	0	0.5	160	4.231
19-Mar-17	49:17.0	23.593	97.3	0.6	0.1638	0	1.51	110.9	4.339
20-Mar-17	49:17.0	23.954	99.5	0	0.3168	0	0	120.7	4.224
20-Mar-17	49:17.0	27.875	90	0	0.2908	0	0.5	176.9	4.339
20-Mar-17	49:17.0	27.924	89.3	0	0.2904	0	0.5	176.9	4.327
20-Mar-17	49:17.0	25.477	93.6	0	0.2895	0	1.51	174.1	4.309
20-Mar-17	49:17.0	24.195	95.8	0.2	0.289	0	2.01	119.3	4.285
20-Mar-17	49:17.0	23.761	97.8	25.01	0.3432	0	2.52	137.6	4.267
20-Mar-17	49:17.0	23.713	98.5	1.8	0.3412	0	1.01	124.9	4.255
20-Mar-17	49:17.0	24.146	99.2	0.4	0.3219	0	0	120.7	4.231
20-Mar-17	49:17.0	30.142	84.3	0	0.2932	0	1.01	108.1	4.345
20-Mar-17	49:17.0	26.842	94.5	0	0.2949	0	1.01	137.6	4.345
20-Mar-17	49:17.0	24.002	98.8	0.8	0.3282	0	0	120.7	4.249
20-Mar-17	49:17.0	22.633	99.6	0	0.1699	0	0	99.7	4.206
20-Mar-17	49:17.0	28.245	85.8	0	0.2919	0	0.5	169.9	4.351
20-Mar-17	49:17.0	22.633	99.5	0	0.1689	0	0	99.7	4.218
20-Mar-17	49:17.0	23.978	99.6	0.2	0.3128	0	0	120.7	4.218
20-Mar-17	49:17.0	22.705	99.7	0.2	0.1703	0	0	99.7	4.206
20-Mar-17	49:17.0	22.776	99.8	0	0.1709	0	0	99.7	4.2
20-Mar-17	49:17.0	22.944	99.8	0	0.1703	0	0	99.7	4.2
20-Mar-17	49:17.0	23.617	99.9	3.8	0.1623	0	0	99.7	4.206
20-Mar-17	49:17.0	24.46	99.9	3.2	0.1648	0	0	99.7	4.363
20-Mar-17	49:17.0	25.695	100	0.6	0.1652	0	0	99.7	4.339
20-Mar-17	49:17.0	24.774	99.8	10.8	0.283	0	1.51	110.9	4.339
20-Mar-17	49:17.0	25.987	99.3	0.2	0.2935	0	1.01	150.2	4.345
20-Mar-17	49:17.0	23.112	99.9	0	0.1703	0	0	99.7	4.2
21-Mar-17	49:17.0	23.545	99.6	0	0.2979	0	0	148.8	4.212
21-Mar-17	49:17.0	24.557	95.5	2	0.2984	0	1.01	148.8	4.303
21-Mar-17	49:17.0	24.75	96.9	0	0.3005	0	0	148.8	4.279
21-Mar-17	49:17.0	24.871	97.5	0	0.3008	0	0	148.8	4.261
21-Mar-17	49:17.0	24.653	98.1	0.2	0.3001	0	0	148.8	4.249
21-Mar-17	49:17.0	24.726	98.5	0	0.3001	0	0	148.8	4.237
21-Mar-17	49:17.0	24.581	98.8	0	0.2994	0	0	148.8	4.231
21-Mar-17	49:17.0	23.545	99.7	0	0.2973	0	0	148.8	4.206
21-Mar-17	49:17.0	23.545	99.4	0	0.2984	0	0	148.8	4.218
21-Mar-17	49:17.0	25.939	88.6	1	0.2942	0	3.02	144.6	4.333
21-Mar-17	49:17.0	23.93	99	0	0.299	0	0	148.8	4.224
21-Mar-17	49:17.0	23.954	100	0	0.3019	0	0	122.1	4.2
21-Mar-17	49:17.0	24.05	99.8	0	0.3072	0	0	120.7	4.206
21-Mar-17	49:17.0	29.64	79.5	0	0.2994	0	2.52	143.2	4.363
21-Mar-17	49:17.0	24.315	100	0	0.3033	0	0	120.7	4.2
21-Mar-17	49:17.0	24.002	99.8	0	0.3095	0	0	120.7	4.212
21-Mar-17	49:17.0	24.146	100	0	0.3008	0	0	124.9	4.194
21-Mar-17	49:17.0	24.823	100	0	0.3008	0	0	124.9	4.273
21-Mar-17	49:17.0	25.04	100	0.2	0.3011	0	0.5	127.8	4.333
21-Mar-17	49:17.0	25.404	100	1	0.2987	0	0.5	134.8	4.339
21-Mar-17	49:17.0	26.842	99.8	0	0.3015	0	1.01	129.2	4.339
21-Mar-17	49:17.0	28.419	98	0	0.3026	0	2.52	123.5	4.363
21-Mar-17	49:17.0	30.9	83.7	0	0.3015	0	2.01	137.6	4.351
21-Mar-17	49:17.0	24.219	100	0	0.3051	0	0	120.7	4.206
22-Mar-17	49:17.0	27.579	85.8	0	0.2928	0	0	183.9	4.267
22-Mar-17	49:17.0	31.459	71.9	0	0.299	0	2.01	162.9	4.363
22-Mar-17	49:17.0	30.52	72	0	0.2952	0	2.01	126.4	4.321
22-Mar-17	49:17.0	30.773	72.6	0	0.2942	0	1.01	165.7	4.321
22-Mar-17	49:17.0	28.965	78.8	0	0.2928	0	0.5	182.5	4.303
22-Mar-17	49:17.0	26.426	90.4	0	0.2925	0	0	183.9	4.249
22-Mar-17	49:17.0	25.866	90.6	0	0.2922	0	0	183.9	4.237
22-Mar-17	49:17.0	25.72	91.5	0	0.2919	0	0	183.9	4.231
22-Mar-17	49:17.0	25.574	92.5	0	0.2914	0	0.5	183.9	4.224
22-Mar-17	49:17.0	25.186	93.7	0	0.2908	0	1.01	168.5	4.206
22-Mar-17	49:17.0	25.55	93.1	0	0.2914	0	0.5	183.9	4.218
22-Mar-17	49:17.0	23.954	99.8	0	0.2973	0	0	148.8	4.2
22-Mar-17	49:17.0	32.355	68.3	0	0.2966	0	2.01	126.4	4.321
22-Mar-17	49:17.0	23.954	100	0	0.297	0	0	148.8	4.2
22-Mar-17	49:17.0	24.026	100	0	0.2966	0	0	148.8	4.2
22-Mar-17	49:17.0	24.098	100	0	0.2963	0	0	148.8	4.194
22-Mar-17	49:17.0	24.146	100	0	0.2959	0	1.01	144.6	4.188
22-Mar-17	49:17.0	24.895	100	0	0.2963	0	1.51	158.6	4.249
22-Mar-17	49:17.0	26.036	99	0	0.2963	0	0.5	155.8	4.339
22-Mar-17	49:17.0	28.394	90	0	0.2959	0	2.01	139	4.333
22-Mar-17	49:17.0	30.394	81.4	0	0.2952	0	1.51	120.7	4.357
22-Mar-17	49:17.0	31.484	74	0	0.2987	0	2.01	134.8	4.327
22-Mar-17	49:17.0	24.171	100	0	0.2959	0	0.5	144.6	4.188
22-Mar-17	49:17.0	32.15	69.8	0	0.2984	0	1.51	136.2	4.333
23-Mar-17	49:17.0	24.75	97.2	0	0.2813	0	0	137.6	4.212
23-Mar-17	49:17.0	27.579	84.7	0	0.283	0	1.01	127.8	4.339
23-Mar-17	49:17.0	26.256	90.3	0	0.283	0	0	127.8	4.291
23-Mar-17	49:17.0	25.331	92.3	0	0.2827	0	0.5	132	4.267
23-Mar-17	49:17.0	25.016	94.5	0	0.2827	0	0.5	137.6	4.255
23-Mar-17	49:17.0	24.605	95.6	0	0.2824	0	0	137.6	4.249
23-Mar-17	49:17.0	24.46	96.4	0	0.2824	0	0	137.6	4.237
23-Mar-17	49:17.0	24.677	97.1	0	0.2817	0	0	137.6	4.218
23-Mar-17	49:17.0	28.196	82.4	0	0.2847	0	1.01	200.8	4.339
23-Mar-17	49:17.0	29.966	79.4	0	0.2853	0	1.01	162.9	4.345
23-Mar-17	49:17.0	24.557	96.9	0	0.2821	0	0	137.6	4.224
23-Mar-17	49:17.0	24.847	95.6	0	0.2901	0	0	153	4.2
23-Mar-17	49:17.0	29.04	80.1	0	0.2834	0	1.01	279.4	4.333
23-Mar-17	49:17.0	24.919	95.1	0	0.2904	0	0.5	144.6	4.206
23-Mar-17	49:17.0	24.629	97.4	0	0.2813	0	0	137.6	4.206
23-Mar-17	49:17.0	24.726	96	0	0.2901	0	0.5	154.4	4.2
23-Mar-17	49:17.0	24.605	96.6	0	0.2898	0	0	153	4.2
23-Mar-17	49:17.0	24.532	97	0	0.2895	0	0.5	123.5	4.194
23-Mar-17	49:17.0	25.574	96.2	0	0.289	0	1.01	82.8	4.249
23-Mar-17	49:17.0	26.842	91.3	0	0.289	0	0.5	132	4.339
23-Mar-17	49:17.0	28.444	87.2	0	0.2881	0	1.01	134.8	4.339
23-Mar-17	49:17.0	29.565	80.1	0	0.2874	0	1.51	123.5	4.333
23-Mar-17	49:17.0	29.215	81.1	0	0.2868	0	1.01	141.8	4.339
23-Mar-17	49:17.0	24.774	97.4	0	0.2895	0	0	53.3	4.194
24-Mar-17	49:17.0	23.978	98.2	0	0.285	0	0	271	4.218
24-Mar-17	49:17.0	31.663	68.4	0	0.2694	0	1.51	147.4	4.345
24-Mar-17	49:17.0	30.041	71.1	0	0.2684	0	0.5	162.9	4.321
24-Mar-17	49:17.0	24.823	92.9	11.8	0.2639	0	3.02	233.1	4.297
24-Mar-17	49:17.0	24.798	95.3	0	0.2773	0	0.5	271	4.273
24-Mar-17	49:17.0	24.75	96.3	0	0.2813	0	0	271	4.255
24-Mar-17	49:17.0	24.557	97.1	0.2	0.283	0	0	271	4.249
24-Mar-17	49:17.0	23.93	98.6	0	0.2853	0	0	271	4.212
24-Mar-17	49:17.0	23.954	98	0	0.2847	0	0	271	4.224
24-Mar-17	49:17.0	32.794	67.2	0	0.2715	0	1.51	189.5	4.339
24-Mar-17	49:17.0	24.46	97.5	0	0.284	0	0	271	4.237
24-Mar-17	49:17.0	24.339	98.2	0	0.2806	0	0	137.6	4.188
24-Mar-17	49:17.0	24.532	97.6	0	0.281	0	0	137.6	4.2
24-Mar-17	49:17.0	32.717	64.7	0	0.2729	0	1.51	168.5	4.369
24-Mar-17	49:17.0	24.508	98	0	0.2806	0	0	137.6	4.194
24-Mar-17	49:17.0	24.557	97.5	0	0.2813	0	0	137.6	4.2
24-Mar-17	49:17.0	24.677	98.2	0	0.2806	0	0	137.6	4.2
24-Mar-17	49:17.0	24.823	90.2	0	0.28	0	1.01	325.7	4.261
24-Mar-17	49:17.0	25.234	88.9	0	0.2796	0	1.01	304.7	4.345
24-Mar-17	49:17.0	26.646	86.1	0	0.2793	0	1.01	21.1	4.339
24-Mar-17	49:17.0	29.74	79.1	0	0.2786	0	0.5	353.8	4.339
24-Mar-17	49:17.0	31.23	73.1	0	0.2766	0	1.01	151.6	4.333
24-Mar-17	49:17.0	32.51	65.7	0	0.2746	0	1.01	172.7	4.321
24-Mar-17	49:17.0	24.629	97.9	0	0.281	0	0	137.6	4.2
25-Mar-17	49:17.0	24.774	95.7	0	0.3029	0	0	162.9	4.255
25-Mar-17	49:17.0	28.717	81.3	0	0.314	0	0.5	338.3	4.339
25-Mar-17	49:17.0	27.85	80.8	0	0.3054	0	1.51	175.5	4.321
25-Mar-17	49:17.0	26.28	92.7	0.6	0.3037	0	0	162.9	4.291
25-Mar-17	49:17.0	25.137	94.5	0	0.3037	0	0.5	162.9	4.267
25-Mar-17	49:17.0	24.291	96.8	0	0.3019	0	0	162.9	4.243
25-Mar-17	49:17.0	24.171	97.6	0	0.3011	0	0	162.9	4.231
[truncated: 18,452 more rows]
