# Supplementary material for: Incidence of clinical malaria, acute respiratory illness, and diarrhoea in children in southern Malawi: a prospective cohort study
Source: Malar J. 2021 Dec 20;20:473. doi: 10.1186/s12936-021-04013-5 (PMC8685799; doi:10.1186/s12936-021-04013-5)
Supplement: Supplementary file 14 — Additional file 14. Appendix 14: Data dictionary for the study. [file 12936_2021_4013_MOESM14_ESM.xlsx]

## Sheet: survey
type	name	label::English	hint::English	repeat_count	constraint	constraint_message	relevant	label::Chichewa	hint::Chichewa	required	appearance	calculation	jr:count	default	read_only	image	audio	media::image	choice_filter
today	today
start	start
end	end
deviceid	deviceid
begin group	openhds	OpenHDS preloaded info								yes	field-list
text	visitId	Visit ID													yes
text	fieldWorkerId	Field Worker ID													yes
text	householdId	Household ID													yes
text	locationId	Location ID													yes
text	individualId	Individual ID													yes
text	firstName	First Name													yes
text	lastName	Last Name													yes
date	dob	Date Of Birth (Enumeration)									no-calendar				yes
integer	gender	Gender (Enumeration)													yes
end group	openhds
select_one visit	visit	Visit number								yes
date	visit_date	Date of visit			date(.) >= date('2017-07-03')	Date cannot be less than study start date. Please enter the correct date!				yes
select_one yn	avail_vist	Is the participant available for follow up?								yes
select_one avail	avail	Why couldn't this interview be conducted?					${avail_vist}='0'
text	other_fu	Other (specify)					${avail}='6' and ${avail_vist}='0'			yes
integer	visit_times	How many attempts have been made for this visit window?			.<=3		${avail}='1' and ${avail_vist}='0'			yes
note	rem_visit	Please visit three times in this window					${avail}='1' and ${visit_times}<3 and ${avail_vist}='0'
begin group	symptoms	Does the participant have any of the following symptoms currently?					${avail_vist}='1'				table-list
select_one yn	fever	Fever/chills								yes
select_one yn	malaise	General weakness/malaise/poor appetite								yes
select_one yn	head	Headache								yes
select_one yn	diarrhea	Diarrhea								yes
select_one yn	cough	Cough								yes
select_one yn	vomit	Vomiting								yes
select_one yn	rash	Skin rash								yes
select_one yn	other_symp	Other								yes
end group	symptoms
text	specify_symp	Other (specify)					${other_symp}='1'
begin group	anthropometry	Record the following					${avail_vist}='1'			yes	table-list
decimal	weight	Weight (Kg)			.>=5 and .<=35	Weight Acceptable range for children is 5.0 to 35.0 kg				yes
decimal	height	Height (cm)			.>=50 and .<=150	Height Acceptable range for Children is 50.0 to 150.0 cm				yes
decimal	muac	MUAC (cm)			(.>=5 and .<=27)	MUAC should be between 5.0 and 27.0 cm				yes
decimal	temp_now	Temperature (⁰C)			(.>=34 and .<=43)	Body temperature should between 34.0 and 43.0 degrees.				yes
end group	anthropometry										table-list
select_one yn	clin_susp	Is there clinical suspicion of malaria?					${avail_vist}='1'			yes
note	test_notice	Please perform a malaria test					(${fever}='1' or ${temp_now}>37.5 or ${clin_susp}='1')
select_one rdt	rdt	What is the RDT result					(${fever}='1' or ${temp_now}>37.5 or ${clin_susp}='1')			yes
select_one yn	hb_checked	Was the Hemoglobin checked?					(${fever}='1' or ${temp_now}>37.5 or ${clin_susp}='1')			yes
decimal	hb	Record the Hemoglobin			.>=1 and .<=20	Hb should be between 1.0 and 20.0 g/dL	${hb_checked}='1'			yes
note	result_notice	Provide LA and indicate today as date of malaria diagnosis	Please record this information on the source card and in health passport				${rdt}='1'
begin group	follow_up	Follow up					${avail_vist}='1'
select_one yn	part_hf	Was the child seen at a health facility since the last visit (except for routine immunisation)?								yes
integer	freq_hf	How many times was the participant seen (including admissions)?			.<15		${part_hf}='1'			yes
note	event_note	Record each clinical event					${part_hf}='1'
begin repeat	cinical_event	Clinical Event					${part_hf}='1'			yes			${freq_hf}
note	new_event	New Event
select_one facility	facility	Which facility was the participant seen?								yes
text	vill_clinic	Name of village clinic					${facility}='10'			yes
text	private_clinic	Name of private clinic					${facility}='12'			yes
text	othet_facility	Other (specify)					${facility}='97'			yes
date	event_date	When was the participant seen?			. <= today()					yes
select_one feveryn	fever_fu	Did they have a fever?								yes
select_one yn	temp_yn	Was a temperature recorded?								yes
decimal	temp	Record the temperature			(.>=34 and .<=43)	Body temperature should between 34.0 and 43.0 degrees.	${temp_yn}='1'			yes
select_one yn	weight_checked	Was the weight recorded?								yes
decimal	weight_follow_up	Record the Weight			(.>=1 and .<=35)		${weight_checked}='1'			yes
select_one rdt_microscopy	rdt_microscopy	Was a malaria test recorded?	Please ask the mother whether a finger prick was done							yes
select_one rdt_result	rdt_result	What was the RDT result					${rdt_microscopy}='1' or ${rdt_microscopy}='3'			yes
select_one microscopy	microscopy	What was the microscopy result					${rdt_microscopy}='2' or ${rdt_microscopy}='3'			yes
select_one yn	dx	Was malaria diagnosed?								yes
select_one yn	other_dx	Was there any other diagnosis?								yes
text	other_dx_specify	Other (specify)					${other_dx}='1'			yes
select_one yn	la_am_yn	Was LA or any other antimalarial prescribed?								yes
begin group	la_am	Which antimalarial was prescribed?					${la_am_yn}='1'			yes	table-list
select_one yn	la	LA								yes
select_one yn	sp	Fansidar or Novidar								yes
select_one yn	arinate	Arinate								yes
select_one yn	quinine	Quinine								yes
select_one yn	artesunate	Artesunate								yes
select_one yn	asaq	ASAQ								yes
select_one yn	other_am	Other antimalarial drugs								yes
end group	la_am									yes
text	specify_other_am	Record other antimalarial	Record all				${other_am}='1'			yes
select_one yn	abx	Were antibiotics prescribed?	e.g. bactrim (cotrimoxazole), amoxyl, ciprofloxacin							yes
begin group	antibiotics_yn	antibiotics					${abx}='1'				table-list
select_one yn	bactrim	bactrim (cotrimoxazole								yes
select_one yn	amoxyl	amoxyl								yes
select_one yn	cipro	ciprofloxacin								yes
select_one yn	genta	gentamicin								yes
select_one yn	other_antibiotics	other antibiotics								yes
end group	antibiotics_yn
text	other_antibiotics_specify	Record other antibiotics					${other_antibiotics}='1'			yes
note	event_end	End of event
end repeat	cinical_event
select_one yn	overcounter	Was the child given drugs from a shop (over-the-counter) for any illness?								yes
select_one yn	overcounter_antimalarial	where any of this drugs antimalarial?					${overcounter}='1'
begin group	overcounter_amd	Which antimalarial was prescribed?					${overcounter}='1' and ${overcounter_antimalarial}='1'			yes	table-list
select_one yn	sp	Fansidar or Novidar								yes
select_one yn	arinate	Arinate								yes
select_one yn	la	LA								yes
select_one yn	quinine	Quinine								yes
select_one yn	unknown	Don't Know								yes
select_one yn	other_drug	Other								yes
end group	overcounter_amd									yes
text	other_overcounter	Other antimalarial drugs					${other_drug}='1'			yes
select_one yn	drug_date_antimalarial	Is the date of the drugs taken known?					${overcounter}='1'			yes
date	drugs_date	Record the date the drugs were bought					${drug_date_antimalarial}='1'			yes
select_one yn	part_adm	Was the participant admitted?					${part_hf}='1'			yes
integer	adm_times	How many times was the participant admitted?			.<=${freq_hf} or .>0		${part_adm}='1'			yes
begin repeat	admission	Admission					${part_adm}='1'						${adm_times}
note	new_adm	New Admission
select_one adm_place	adm_place	Where was the participant admitted?								yes
text	adm_place_other	Specify other					${adm_place}='97'			yes
select_one yn	adm_date_known	Is the date of admission known?								yes
date	adm_date	When was the participant admitted?					${adm_date_known}='1'			yes
text	adm_dx	What was the diagnosis?	RECORD ONLY DOCUMENTED DIAGNOSIS				${part_adm}='1'			yes
end repeat	admission
end group	follow_up
begin group	starting	Did the child have any of the following in the past 2 months?					${avail_vist}='1'				table-list
select_one yn	child_diarrhea	Diarrhea								yes
select_one yn	child_cough	Cough								yes
select_one yn	child_rash	Rash								yes
end group	starting
integer	numofdiarrhea	How many times did your child have diarrhea occur?			.>0 and .<=5		${child_diarrhea}='1'			yes
begin repeat	diarrhea_event	Diarrhea Event		${numofdiarrhea}			${child_diarrhea}='1'
date	diarrhea_date	enter date ${diarrhea_event} occurred?			. <= today()	Incorrect date. Date should be before today	${child_diarrhea}='1'			yes
begin group	diarrhea	Did the child have any of the following symptoms?					${child_diarrhea}='1'
select_one yn1	blood_stool	Blood in stool								yes
integer	blood_stool_days	Number of days Blood in stool? (Enter 99 If more than 5 times)			(.>0 and .<=5) or .=99		${blood_stool}='1'			yes
integer	exact_blood_stool	Enter the exact number of days blood was in stool			.>5	Number of days should be more than 5	${blood_stool_days}='99'			yes
select_one yn1	vomitting	Vomiting								yes
integer	vomitting_days	Number of days Vomitting? (Enter 99 If more than 5 times)			(.>0 and .<=5) or .=99		${vomitting}='1'			yes
integer	exact_vomitting_days	Enter the exact number of days vomitting?			.>5	Number of days should be more than 5	${vomitting_days}='99'			yes
select_one yn1	fever_diarrhea	Fever								yes
integer	fever_days_diarrhea	Number of days Fever? (Enter 99 If more than 5 times)			(.>0 and .<=5) or .=99		${fever_diarrhea}='1'			yes
integer	exact_fever_days	Enter the exact number of days Fever?			.>5	Number of days should be more than 5	${fever_days_diarrhea}='99'			yes
select_one yn1	general_pains	General aches and pains								yes
integer	general_pains_days	Number of days aches and pains (Enter 99 If more than 5 times)			(.>0 and .<=5) or .=99		${general_pains}='1'			yes
integer	exact_pain_days	Enter the exact number of days aches and pains?			.>5	Number of days should be more than 5	${general_pains_days}='99'			yes
select_one yn1	other_symptoms	Other symptoms								yes
text	other_specify_Diarrhea	Other symptoms (Please Describe)					${other_symptoms}='1'			yes
integer	other_symptoms_days	Number of days ${other_specify_Diarrhea}? (Enter 99 If more than 5 times)			(.>0 and .<=5) or .=99		${other_symptoms}='1'			yes
integer	exact_other_days	Enter the exact number of days of ${other_specify_Diarrhea}?			.>5	Number of days should be more than 5	${other_symptoms_days}='99'			yes
select_one yn	given_medicine_diarrhea	Was the child given any medicine?								yes
select_multiple p_medicine	medicines_particular	Are there particular medicines that were given to your child when he or she had diarrhea?					${given_medicine_diarrhea}='1'			yes
text	medicines_particular_Specify	Other medicine please Specify?					selected (${medicines_particular},'5')			yes
end group	diarrhea
select_one g_medicine	get_medicine	Where did you get these medicines?					${given_medicine_diarrhea}='1'			yes
text	get_medicine_other	Where did you get these medicines(Other specify)?					${get_medicine}='5'			yes
select_one h_community	community_help	who in your community helps you when your child has diarrhea?					${child_diarrhea}='1'			yes
text	community_help_other	Specify who else helps in the community?					${community_help}='4'			yes
select_one diarrhea_code	diagnoses_code_diarrhea	Enter diagnoses
end repeat
integer	numofcough	How many times did you child have a cough occur?			.>0 and .<=5		${child_cough}='1'			yes
begin repeat	cough_event	Cough Event		${numofcough}			${child_cough}='1'
date	cough_date	enter date ${cough_event} occurred?			. <= today()	Incorrect date. Date should be before today	${child_cough}='1'			yes
begin group	cough	Did the child have any of the following symptoms?					${child_cough}='1'
select_one yn1	short_breath	Shortness of breath								yes
integer	short_breath_days	Number of days short of breath? (Enter 99 If more than 5 times)			(.>0 and .<=5) or .=99		${short_breath}='1'			yes
integer	exact_breath_days	Enter the exact number of days short of breath			.>5	Number of days should be more than 5	${short_breath_days}='99'			yes
select_one yn1	sputum	Sputum Production								yes
integer	sputum_days	Number of days Sputum Production? (Enter 99 If more than 5 times)			(.>0 and .<=5) or .=99		${sputum}='1'			yes
integer	exact_sputum_days	Enter the exact number of days sputum production			.>5	Number of days should be more than 5	${sputum_days}='99'			yes
select_one yn1	stuffy_nose	Stuffy or runny Nose								yes
integer	stuffy_nose_days	Number of days nose stuffy or runny? (Enter 99 If more than 5 times)			(.>0 and .<=5) or .=99		${stuffy_nose}='1'			yes
integer	exact_nose_days	Enter the exact number of days stuffy or runny nose			.>5	Number of days should be more than 5	${stuffy_nose_days}='99'			yes
select_one yn1	fever_cough	Fever								yes
integer	fever_days_cough	Number of days Fever? (Enter 99 If more than 5 times)			(.>0 and .<=5) or .=99		${fever_cough}='1'			yes
integer	exact_fever_days_cough	Enter the exact number of days fever?			.>5	Number of days should be more than 5	${fever_days_cough}='99'			yes
select_one yn1	noisy_breathing	Noisy breathing								yes
integer	noisy_breathing_days	Number of days breathing noisy? (Enter 99 If more than 5 times)			(.>0 and .<=5) or .=99		${noisy_breathing}='1'			yes
integer	exact_breathing_days	Enter the exact number of days noisy breathing			.>5	Number of days should be more than 5	${noisy_breathing_days}='99'			yes
select_one yn1	worse_cough	New or worse cough?								yes
integer	worse_cough_days	Number of days New or worse cough? (Enter 99 If more than 5 times)			(.>0 and .<=5) or .=99		${worse_cough}='1'			yes
integer	exact_cough_days	Enter the exact number of days new or worse cough			.>5	Number of days should be more than 5	${worse_cough_days}='99'			yes
select_one yn1	chest_pain	Chest pain								yes
integer	chest_pain_days	Number of days of chest Pains (Enter 99 If more than 5 times)			(.>0 and .<=5) or .=99		${chest_pain}='1'
integer	exact_pain_days	Enter the exact number of days chest Pains			.>5	Number of days should be more than 5	${chest_pain_days}='99'			yes
select_one yn1	night_sweats	Night sweats								yes
integer	night_sweats_days	Number of days of Night Sweats (Enter 99 If more than 5 times)			(.>0 and .<=5) or .=99		${night_sweats}='1'
integer	exact_sweats_days	Enter the exact number of days Night Sweats			.>5	Number of days should be more than 5	${night_sweats_days}='99'			yes
select_one yn1	other_symptoms_cough	Other symptoms								yes
text	other_specify_cough	Other symptoms (Please Describe)					${other_symptoms_cough}='1'			yes
integer	other_symptoms_days_cough	Number of days ${other_specify_cough}? (Enter 99 If more than 5 times)			(.>0 and .<=5) or .=99		${other_symptoms_cough}='1'			yes
integer	exact_other_days	Enter the exact number of days ${other_specify_cough}?			.>5		${other_symptoms_days_cough}='99'			yes
end group	cough
select_one yn	child_immunizaations	Has the child had any immunizations?					${child_cough}='1'			yes
select_one immunizaations	child_immunizaations_visit	How many immunization visits has the child had?					${child_immunizaations}='1'			yes
select_one yn	tb_contact	History of TB contact in the family?					${child_cough}='1'			yes
select_one cough_code	diagnoses_code_cough	Enter diagnoses
end repeat
select_one yn	history_asthma	Is there any history of Asthma in the family					${child_cough}='1'			yes
select_one yn1	failure_thrive	Failure thrive					${avail_vist}='1'			yes
integer	failure_thrive_days	Number of days failure thrive? (Enter 99 If more than 5 times)			(.>0 and .<=5) or .=99		${failure_thrive}='1'			yes
integer	exact_thrive_days	Enter the exact number of days failure thrive?			.>5	Number of days should be more than 5	${failure_thrive_days}='99'			yes
integer	numofrash	How many times did your child have a rash occur? (Enter 99 If more than 5 times)			.>0 and .<=5		${child_rash}='1'			yes
integer	exact_rash_days	Enter the exact number of rash occurred?			.>5	Number of days should be more than 5	${numofrash}='99'			yes
begin repeat	rash_event	Rash Event		${numofrash}			${child_rash}='1'
date	rash_date	enter date ${rash_event} occurred?			. <= today()	Incorrect date. Date should be before today	${child_rash}='1'			yes
select_one rash_develop	child_rash_develop	Where did the child develop the rash?					${child_rash}='1'			yes
text	child_rash_develop_specify	Specify where child rash developed?					${child_rash_develop}='4'			yes
begin group	rash	Did the child have any of the following symptoms?					${child_rash}='1'
select_one yn1	fever_rash	Fever					${avail_vist}='1'			yes
integer	fever_days	Number of day Fever? (Enter 99 If more than 5 times)			(.>0 and .<=5) or .=99		${fever_rash}='1'			yes
integer	exact_fever_days_rash	Enter the exact number of days fever occurred?			.>5	Number of days should be more than 5	${fever_days}='99'			yes
select_one yn1	Itchiness	Itchiness					${avail_vist}='1'			yes
integer	Itchiness_days	Number of days Itchiness? (Enter 99 If more than 5 times)			(.>0 and .<=5) or .=99		${Itchiness}='1'			yes
integer	exact_itchiness_days	Enter the exact number of days itchiness occurred?			.>5	Number of days should be more than 5	${Itchiness_days}='99'			yes
select_one yn1	general_aches	General aches and pains					${avail_vist}='1'			yes
integer	general_aches_days	Number of days aches and pains (Enter 99 If more than 5 times)			(.>0 and .<=5) or .=99		${general_aches}='1'			yes
integer	exact_aches_days_rash	Enter the exact number of days aches and pains occurred			.>5	Number of days should be more than 5	${general_aches_days}='99'			yes
select_one yn1	discoloured_skin	Discoloured skin					${avail_vist}='1'			yes
integer	discoloured_skin_days	Number of days Skin discoloured? (Enter 99 If more than 5 times)			(.>0 and .<=5) or .=99		${discoloured_skin}='1'			yes
integer	exact_discoloured_skin_days	Enter the exact number of days Skin Discoloured			.>5	Number of days should be more than 5	${discoloured_skin_days}='99'			yes
select_one yn1	other_symptoms_rash	Other symptoms (Please Describe)					${avail_vist}='1'			yes
text	other_specify_rash	Other symptoms (Please Describe)					${other_symptoms_rash}='1'			yes
integer	other_symptoms_days_rash	Number of days ${other_specify_rash}? (Enter 99 If more than 5 times)			(.>0 and .<=5) or .=99		${other_symptoms_rash}='1'			yes
integer	exact_other_rash_day	Enter the exact number of days ${other_specify_rash}?			.>5	Number of days should be more than 5	${other_symptoms_days_rash}='99'			yes
end group	rash
select_one yn	rash_medicine	Are there particular medicines for the rash that were given to your child?					${child_rash}='1'			yes
select_one g_medicine	medicine_location	Where did you get these medicines?					${rash_medicine}='1'			yes
text	medicine_location_other	Where did you get these medicines(Other specify)?					${medicine_location}='5'			yes
select_one rash_code	diagnoses_code_rash	Enter diagnoses
end repeat
note	note_begin	Nutritional assessment					${avail_vist}='1'
begin group	Nutritional_assessment	Nutritional assessment					${avail_vist}='1'
select_one yn	child_admitted	Has the child been admitted because of malnutrition?								yes
select_one c_malmutrition	malnutrition_cause	What was the cause of malnutrition?					${child_admitted}='1'			yes
select_one yn	malnutrition_supplement	Was the child taking any nutritional supplements for the condition?					${child_admitted}='1'			yes
end group	Nutritional_assessment
note	rem_exit	Please complete study exit form
begin group	study_exit	This is the beginning of the STUDY EXIT FORM
select_one exit	exit	Give the reason for completing this form								yes
text	other_exit	Specify other					${exit}='97'			yes
date	exit_date	When did the participant exit the study?			date(.) >= date('2017-07-03')					yes
begin group	death	Death information					${exit}='4' or ${avail}='4'			yes
select_one death_place	death_place	Where did the patient die?					${exit}='4' or ${avail}='4'			yes
text	other_death_place	Specify other					${death_place}='97'			yes
select_one yn	dod	Can you recall the day and month of death					${exit}='4' or ${avail}='4'			yes
date	date_of_death	Date of Death					${dod}='1'			yes
select_one ynd	month_only	Month only					${dod}='0'			yes
date	est_dod	Month of death	Record 1st day of month of death				${month_only}='1'			yes
select_multiple cod	cod	Cause of Death					${exit}='4' or ${avail}='4'			yes
end group	death						${exit}='4' or ${avail}='4'			yes
text	other_cod	Other (specify)					${cod}='97'			yes
end group	study_exit
note	finish	End of interview					${avail}='1'

## Sheet: choices
list_name	name	label::English	label::Chichewa
yn	1	Yes
yn	0	No
adm_place	1	Chikwawa DH
adm_place	2	Mwanza DH
adm_place	3	QECH
adm_place	97	Other (specify)
facility	1	Chikhwawa District Hospital
facility	2	Kapichira Health Centre
facility	3	Kakoma Health Centre
facility	4	Misomali Health Centre
facility	5	Chapananga Health Centre
facility	6	Majete Health Centre
facility	7	Tulonkhondo Health Centre
facility	8	Chithumba Health Centre
facility	9	Chabvala Health Centre
facility	10	Village Clinic
facility	11	Incidence study visit
facility	12	Private Clinic
facility	97	Other
rdt_result	1	Positive
rdt_result	2	Negative
rdt_result	3	Not available
microscopy	1	Positive
microscopy	2	Negative
microscopy	3	Not available
visit	2	2 months (interim)
visit	4	4 months (interim)
visit	6	6 months (study visit)
visit	8	8 months (interim)
visit	10	10 months (interim)
visit	12	12 months (study visit)
rdt_microscopy	1	RDT only
rdt_microscopy	2	Microsopy only
rdt_microscopy	3	Both RDT and microsopy
rdt_microscopy	4	Not done
rdt_microscopy	99	Unknown
rdt	1	Positive
rdt	2	Negative
rdt	3	Invalid
rdt	4	Not done
avail	1	Participant temporarily unavailable
avail	2	Participant permanently unavailable
avail	4	Death of participant
avail	5	Participant withdrew from study
avail	6	Other
death_place	1	At home
death_place	2	Chikhwawa District Hospital
death_place	3	Mwanza District Hospital
death_place	4	QECH
death_place	5	Kapichira Health Centre
death_place	6	Kakoma Health Centre
death_place	7	Misomali Health Centre
death_place	8	Chapananga Health Centre
death_place	9	Majete Health Centre
death_place	10	Tulonkhondo Health Centre
death_place	11	Chithumba Health Centre
death_place	12	Chabvala Health Centre
death_place	13	On the way to health facility
death_place	14	Village Clinic
death_place	97	Other
exit	1	Participant withdrew from study
exit	2	Lost to follow up
exit	3	Participant relocated
exit	4	Death of participant
exit	5	Completed follow up
exit	6	Participant exited due to study end
exit	97	Other (specify)
cod	1	Malaria
cod	2	Anaemia
cod	3	Bacterial mengitis
cod	4	Severe diarrhoea
cod	5	Septicaemia
cod	6	Severe pneumonia
cod	7	Trauma/accident
cod	97	Other
cod	99	Unknown
ynd	1	Yes
ynd	0	No
ynd	99	Don't know
feveryn	0	no
feveryn	1	yes
feveryn	2	not recorded
yn1	1	Yes
yn1	0	No
yn1	2	Don't Know
p_medicine	1	Paracetamol
p_medicine	2	Metronidazole (Flagyl)
p_medicine	3	Zinc
p_medicine	4	ORS
p_medicine	5	Other (Specify)
g_medicine	1	Village Clinic
g_medicine	2	Health Centre
g_medicine	3	Private Clinic
g_medicine	4	District Hospital
g_medicine	5	Other (Specify)
h_community	1	Health survellance assitant (HAS)
h_community	2	Traditional Healer
h_community	3	Relatives
h_community	4	Other (Specify)
immunizaations	1	1
immunizaations	2	2
immunizaations	3	3
immunizaations	4	>3
rash_develop	1	Face
rash_develop	2	Whole Body
rash_develop	4	Other (Specify)
c_malmutrition	1	Stunting (Failure to grow/thrive)
c_malmutrition	2	Wasting
c_malmutrition	3	Underweight
diarrhea_code	d1	d1
diarrhea_code	d2	d2
cough_code	c1	c1
cough_code	c2	c2
cough_code	c3	c3
cough_code	c4	c4
cough_code	c5	c5
cough_code	c6	c6
cough_code	c7	c7
rash_code	r1	r1
rash_code	r2	r2
rash_code	r3	r3
rash_code	r4	r4
rash_code	r5	r5

## Sheet: settings
form_title	form_id	default_language	instance_name
IS_Follow_Up_v6	IS_Follow_Up_v6	English	concat('followup','_',${visit}, '_', ${individualId}, '_', ${fieldWorkerId}, '_', ${locationId})
